# Supplementary material for: Plasmid detection and assembly in genomic and metagenomic data sets
Source: PubMed Central journal article supplement — Genome Res. 2019 Jun;29(6):961–8. doi: 10.1101/gr.241299.118 (PMC6581055; doi:10.1101/gr.241299.118), 2019-06
Supplement: supp_gr.241299.118_Supplemental_Fig_S1.pdf [file supp_gr.241299.118_Supplemental_Fig_S1.pdf]

A

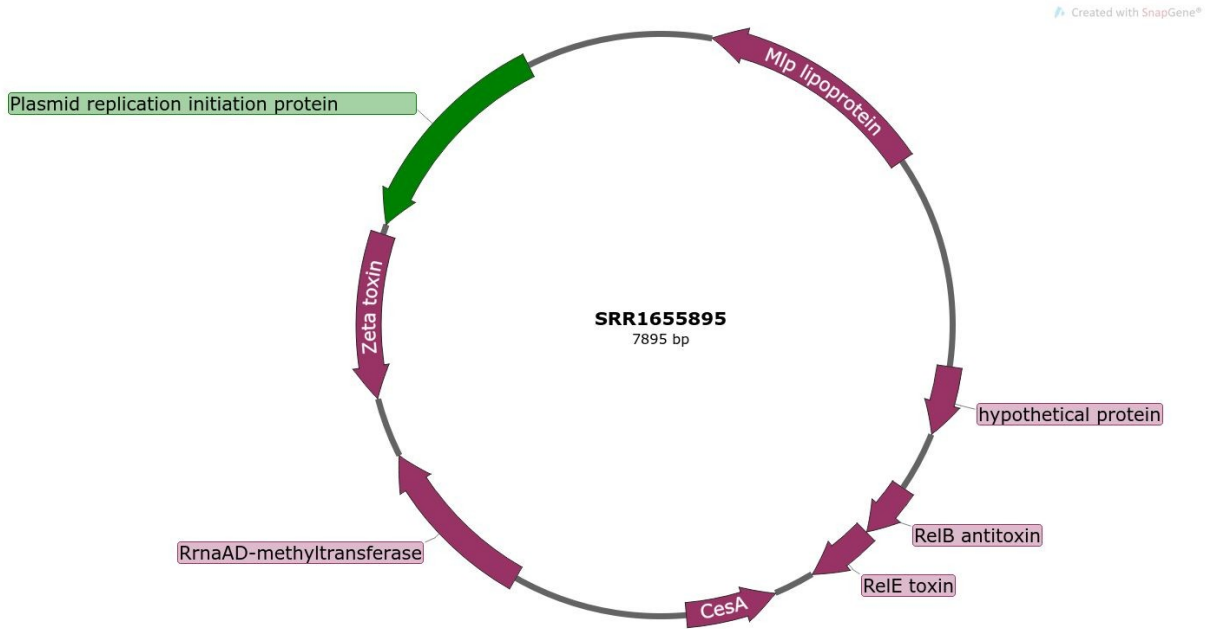

B

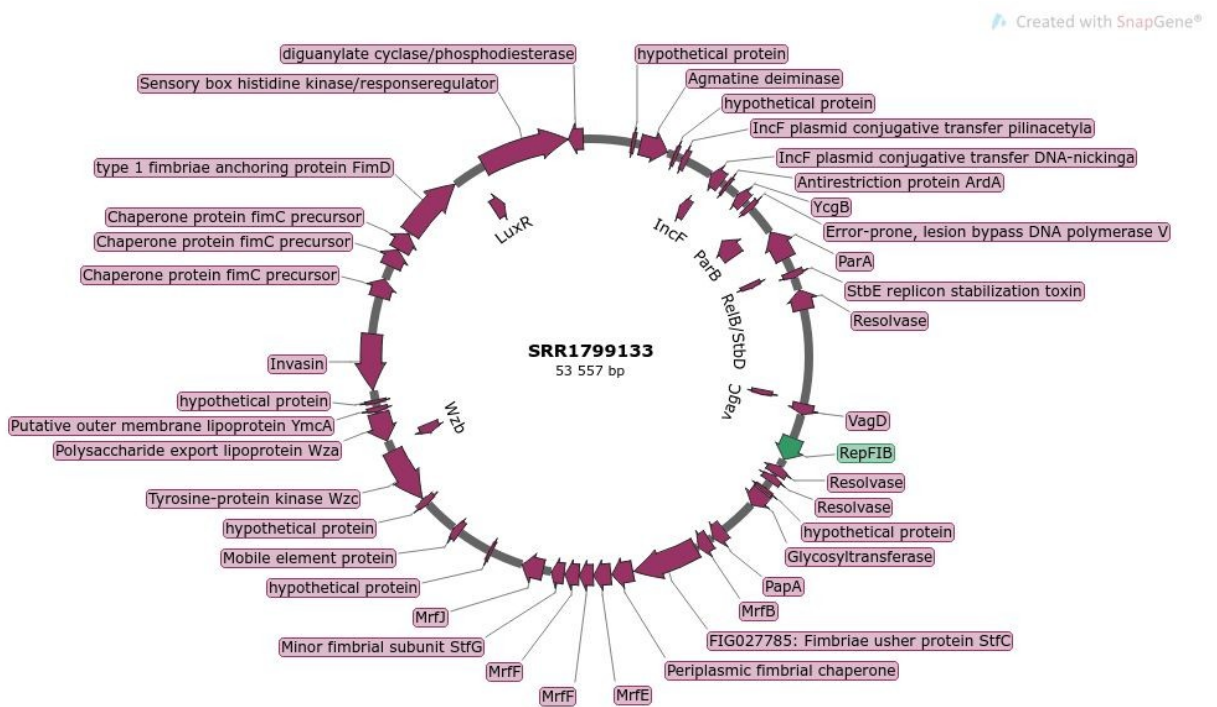

C

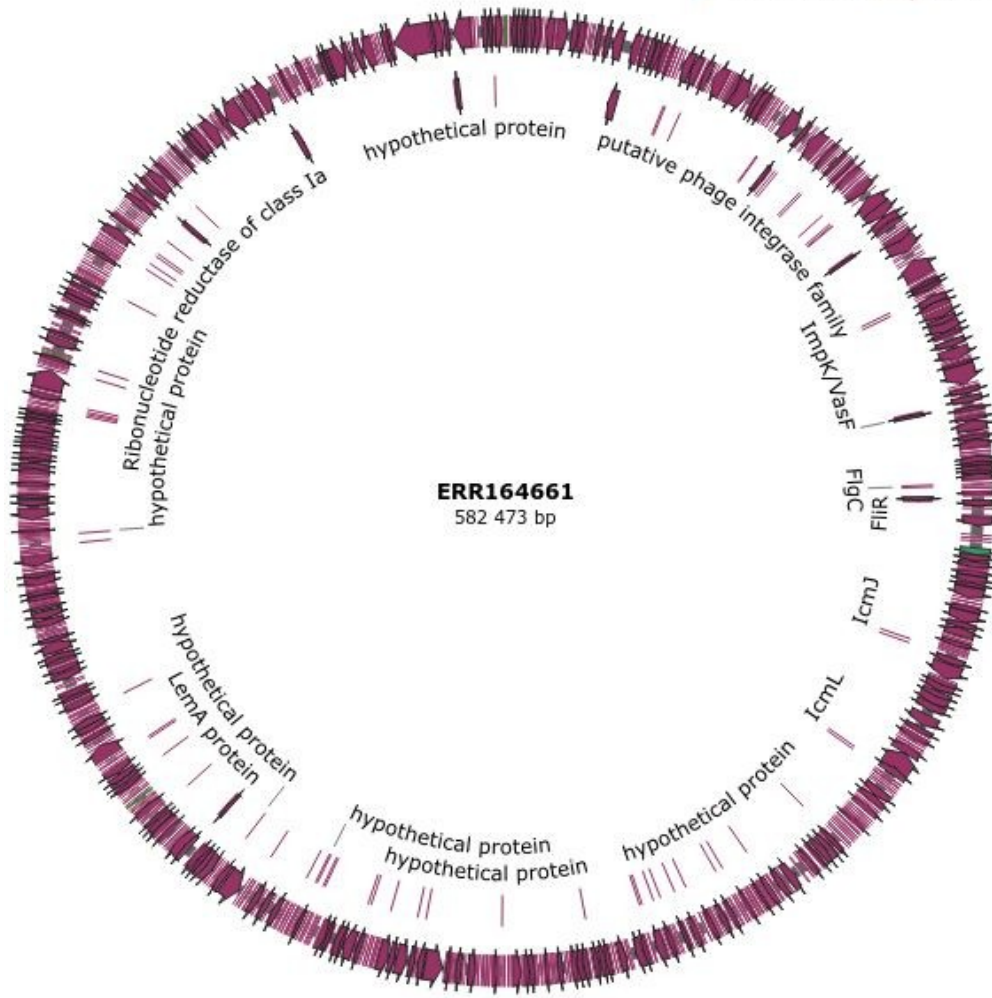

D

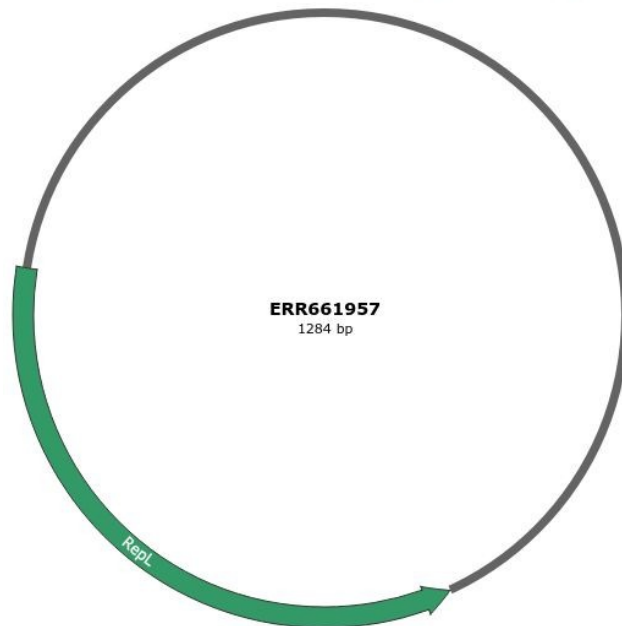

**Figure S1. Maps of the example plasmids from the ISOLATES dataset.**

Plasmid replication proteins are highlighted in green. (A) 7,895 bp long plasmid from *Streptococcus pseudopneumoniae* clinical isolate, (B) 53,557 bp long plasmid from *Enterobacter sp.* CC120223-11, (C) 582 kb long plasmid from halophilic marine gammaproteobacteria *Ferrimonas marina*, strain DSM 16917, (D) 1284 bp long plasmid from the fish pathogen *Ca. Ichthyocystis* 2013Ark19i. The maps built with the SnapGene software (GSL Biotech, [snapgene.com](http://snapgene.com)).
