# Supplementary material for: Plasmid detection and assembly in genomic and metagenomic data sets
Source: HighWire-hosted journal article supplement (doi:10.1101/gr.241299.118), 2019-05-02
Supplement: Supplemental_Table_S1.docx [file Supplemental_Table_S1.docx]

| phylum | #plasmids  (test dataset) | #chromosome chunks  (test dataset) | #plasmids (training dataset) | #chromosome chunks  (training dataset) | False Negatives, % | False Positives, % |
| --- | --- | --- | --- | --- | --- | --- |
| Firmicutes | 2,258 | 57,631 | 7,302 | 265,078 | 14.7 | 2.7 |
| Proteobacteria | 4,963 | 195,356 | 4,597 | 127,353 | 14.6 | 2.8 |
| Cyanobacteria | 189 | 3,551 | 9,371 | 319,158 | 19.0 | 3.6 |
| Bacteroidetes | 107 | 12,689 | 9,453 | 310,020 | 19.6 | 1.3 |

**Table S1. Cross-validation of plasmidVerify on various taxonomic groups (Firmicutes, Proteobacteria, Cyanobacteria, and Bacteroidetes).** For each phylum, plasmidVerify was trained on genomes and plasmids from all other phyla, and tested on genomes and plasmids from the selected phylum.
