# Supplementary material for: Plasmid detection and assembly in genomic and metagenomic data sets
Source: HighWire-hosted journal article supplement (doi:10.1101/gr.241299.118), 2019-05-02
Supplement: Supplemental_Table_S4.docx [file Supplemental_Table_S4.docx]

| dataset | access info | #reads  (millions) | read length  (bp) | average insert size  (bp) |
| --- | --- | --- | --- | --- |
| ISOLATES | Supplemental_List_S1.txt | 3 | 100 | 265 |
| HMP | SRR2822457 | 15 | 100 | 261 |
| MBARC | SRR3656745 | 174 | 150 | 300 |
| SYNTH | SRX200676 | 109 | 100 | 200 |
| INFANT | ERR526087 | 24 | 100 | 318 |
| CROHN | ERP105968 | 93 | 150 | 378 |
| PLASMIDOME | ERR1538272 | 9 | 150 | 500 |
| MARINE | SRX684858 | 28 | 150 | 600 |
| LAKE | ERS433966 | 33 | 101 | 440 |

**Table S4. Information about benchmarking datasets.**
