# Supplementary material for: Plasmid detection and assembly in genomic and metagenomic data sets
Source: HighWire-hosted journal article supplement (doi:10.1101/gr.241299.118), 2019-05-02
Supplement: Supplemental_Table_S5.docx [file Supplemental_Table_S5.docx]

| BLAST best hit in the nt database | #verified cyclocontigs | | | | #verified cyclocontigs that contain ARGs |
| --- | --- | --- | --- | --- | --- |
| all | Identity <90% | Identity 90-95% | Identity >95% |
| plasmid with span >90% | 603 | 16 | 73 | 514 | 79 |
| plasmid with span from 70% to 90% | 170 | 26 | 55 | 89 | 23 |
| plasmid with span from 50 to 70% | 153 | 43 | 64 | 46 | 16 |
| plasmid with span from 30 to 50% | 107 | 51 | 36 | 20 | 6 |
| plasmid with span from 10% to 30% | 101 | 85 | 14 | 2 | 2 |
| bacterial chromosome | 480 | 167 | 96 | 217 | 31 |
| virus/phage | 31 | 11 | 3 | 17 | 2 |
| ambiguous match to plasmid/chromosome with span >10% | 255 | - | - | - | 40 |
| no match to known plasmids/chromosomes | 380 | - | - | - | 4 |

**Table S5. Analysis of cyclocontigs in the ISOLATES dataset reported by plasmidSPAdes and verified by plasmidVerify.**
