# Supplementary material for: Plasmid detection and assembly in genomic and metagenomic data sets
Source: HighWire-hosted journal article supplement (doi:10.1101/gr.241299.118), 2019-05-02
Supplement: Supplemental_Table_S6.docx [file Supplemental_Table_S6.docx]

|  | cBar | PlasFlow | repl_HMM | plasmidVerify |
| --- | --- | --- | --- | --- |
| Precision | 0.66 | 0.75 | 0.88 | 0.91 |
| Recall | 0.97 | 0.89 | 0.79 | 0.94 |

**Table S6. BLAST-based benchmarking of various plasmid verification tools on cyclocontigs constructed by metaplasmidSPAdes (ISOLATES dataset).** Precision is defined as #True Positive/(#True Positive + #False Positive). Recall is defined as #True Positive/(#True Positive + #False Negative). The precision and recall were computed for plasmid and chromosome alignments with span exceeding 10%.
