# Supplementary material for: Plasmid detection and assembly in genomic and metagenomic data sets
Source: HighWire-hosted journal article supplement (doi:10.1101/gr.241299.118), 2019-05-02
Supplement: Supplemental_Table_S8.xlsx [file Supplemental_Table_S8.xlsx]

## Sheet: Sheet1
HMM Pfam ID	Pfam Description	# of matches to plasmid	# of matches to chromosomes	frequency of HMM in PlasmidDatabase	frequency of HMM in nonPlasmidDatabase	frequency ratio
DUF1380	Protein of unknown function (DUF1380)	889	0	0.00131569	3.74124e-07	3516.71
Borrelia_orfA	Borrelia ORF-A	628	0	0.00092985	3.74124e-07	2485.4
Borrelia_lipo_1	Borrelia burgdorferi virulent strain associated lipoprotein	599	0	0.00088698	3.74124e-07	2370.81
PsiB	Plasmid SOS inhibition protein (PsiB)	523	0	0.000774629	3.74124e-07	2070.51
DUF226	Borrelia family of unknown function DUF226	516	0	0.000764281	3.74124e-07	2042.85
Plasmid_parti	Putative plasmid partition protein	506	0	0.000749498	3.74124e-07	2003.34
Lipoprotein_2	Borrelia lipoprotein	471	0	0.000697757	3.74124e-07	1865.04
DUF228	Lyme disease proteins of unknown function	457	0	0.000677061	3.74124e-07	1809.72
ParB	ParB family	402	0	0.000595755	3.74124e-07	1592.4
TraQ	Type-F conjugative transfer system pilin chaperone (TraQ)	326	0	0.000483404	3.74124e-07	1292.09
TrbE	Conjugal transfer protein TrbE	296	0	0.000439055	3.74124e-07	1173.55
PsiA	PsiA protein	572	1	0.000847065	7.48249e-07	1132.06
KID	KID repeat	238	0	0.000353314	3.74124e-07	944.375
DUF261	Protein of unknown function, DUF261	236	0	0.000350357	3.74124e-07	936.472
Mlp	Mlp lipoprotein family	233	0	0.000345922	3.74124e-07	924.618
Borrelia_orfD	Borrelia orf-D family	218	0	0.000323747	3.74124e-07	865.347
Lipoprotein_6	Lipoprotein	210	0	0.000311921	3.74124e-07	833.737
DUF603	Protein of unknown function, DUF603	206	0	0.000306008	3.74124e-07	817.931
DUF1357	Protein of unknown function (DUF1357)	205	0	0.00030453	3.74124e-07	813.98
DUF276	DUF276	198	0	0.000294182	3.74124e-07	786.32
TraA	TraA	397	1	0.000588363	7.48249e-07	786.32
RP-C_C	Replication protein C C-terminal region	388	1	0.000575058	7.48249e-07	768.539
DUF685	Protein of unknown function (DUF685)	193	0	0.00028679	3.74124e-07	766.563
TraW_N	Sex factor F TraW protein N terminal	192	0	0.000285312	3.74124e-07	762.612
DUF735	Protein of unknown function (DUF735)	192	0	0.000285312	3.74124e-07	762.612
FinO_N	Fertility inhibition protein N terminal	385	1	0.000570623	7.48249e-07	762.612
DUF693	Protein of unknown function (DUF693)	191	0	0.000283833	3.74124e-07	758.661
DUF244	Uncharacterized protein family (ORF7) DUF	188	0	0.000279399	3.74124e-07	746.807
Rop	Rop protein	187	0	0.00027792	3.74124e-07	742.855
DUF777	Borrelia burgdorferi protein of unknown function (DUF777)	186	0	0.000276442	3.74124e-07	738.904
DUF1473	Protein of unknown function (DUF1473)	185	0	0.000274964	3.74124e-07	734.953
DUF787	Borrelia burgdorferi protein of unknown function (DUF787)	184	0	0.000273485	3.74124e-07	731.001
DUF1463	Protein of unknown function (DUF1463)	180	0	0.000267572	3.74124e-07	715.196
DUF792	Borrelia burgdorferi protein of unknown function (DUF792)	179	0	0.000266094	3.74124e-07	711.244
DUF1322	Protein of unknown function (DUF1322)	178	0	0.000264616	3.74124e-07	707.293
DUF764	Borrelia burgdorferi protein of unknown function (DUF764)	174	0	0.000258702	3.74124e-07	691.488
RepB-RCR_reg	Replication regulatory protein RepB	509	2	0.000753933	1.12237e-06	671.731
IncFII_repA	IncFII RepA protein family	826	4	0.00122255	1.87062e-06	653.555
DUF3890	Domain of unknown function (DUF3890)	158	0	0.00023505	3.74124e-07	628.266
BLYB	Borrelia hemolysin accessory protein	157	0	0.000233571	3.74124e-07	624.315
Holin_BlyA	holin, BlyA family	157	0	0.000233571	3.74124e-07	624.315
TraS	Plasmid conjugative transfer entry exclusion protein TraS	156	0	0.000232093	3.74124e-07	620.363
DUF759	Borrelia burgdorferi protein of unknown function (DUF759)	155	0	0.000230615	3.74124e-07	616.412
Borrelia_lipo_2	Borrelia burgdorferi BBR25 lipoprotein	153	0	0.000227658	3.74124e-07	608.509
DUF1506	Protein of unknown function (DUF1506)	151	0	0.000224702	3.74124e-07	600.606
TraP	TraP protein	293	1	0.00043462	7.48249e-07	580.85
Tra_M	TraM protein, DNA-binding	388	2	0.000575058	1.12237e-06	512.359
TAL_effector	TAL effector repeat	126	0	0.000187744	3.74124e-07	501.822
pXO2-11	Uncharacterized protein pXO2-11	113	0	0.000168526	3.74124e-07	450.455
HTH_10	HTH DNA binding domain	110	0	0.000164091	3.74124e-07	438.601
PilI	Plasmid conjugative transfer protein PilI	107	0	0.000159656	3.74124e-07	426.747
DUF1173	Protein of unknown function (DUF1173)	295	2	0.000437577	1.12237e-06	389.867
DUF2689	Protein of unknown function (DUF2689)	194	1	0.000288268	7.48249e-07	385.257
DUF5431	Family of unknown function (DUF5431)	266	2	0.000394706	1.12237e-06	351.671
BPTA	Borrelial persistence in ticks protein A	86	0	0.000128612	3.74124e-07	343.768
DUF643	Protein of unknown function (DUF643)	81	0	0.000121221	3.74124e-07	324.011
TraH_2	TraH_2	80	0	0.000119742	3.74124e-07	320.06
Cdc6_C	CDC6, C terminal winged helix domain	79	0	0.000118264	3.74124e-07	316.109
Erp_C	Erp protein C-terminus	79	0	0.000118264	3.74124e-07	316.109
Telomere_res	Telomere resolvase	74	0	0.000110872	3.74124e-07	296.352
DUF5388	Family of unknown function (DUF5388)	68	0	0.000102003	3.74124e-07	272.644
KORA	TrfB plasmid transcriptional repressor	202	2	0.000300095	1.12237e-06	267.375
Chlam_vir	Pgp3 C-terminal domain	65	0	9.75678e-05	3.74124e-07	260.79
TraC	TraC-like protein	131	1	0.000195135	7.48249e-07	260.79
DUF1419	Protein of unknown function (DUF1419)	63	0	9.46112e-05	3.74124e-07	252.887
Rep_1	Replication protein	364	5	0.000539579	2.24475e-06	240.374
Shigella_OspC	Shigella flexneri OspC protein	58	0	8.72197e-05	3.74124e-07	233.13
TraI	DNA helicase TraI	114	1	0.000170004	7.48249e-07	227.203
KorB_C	KorB C-terminal beta-barrel domain	55	0	8.27848e-05	3.74124e-07	221.276
EppA_BapA	Exported protein precursor (EppA/BapA)	55	0	8.27848e-05	3.74124e-07	221.276
Endotoxin_M	delta endotoxin	54	0	8.13065e-05	3.74124e-07	217.325
DUF5514	Family of unknown function (DUF5514)	53	0	7.98282e-05	3.74124e-07	213.373
Rep_3	Initiator Replication protein	2018	37	0.00298469	1.42167e-05	209.942
ParG	ParG	52	0	7.83499e-05	3.74124e-07	209.422
Prok-TraM	Prokaryotic Transcriptional repressor TraM	52	0	7.83499e-05	3.74124e-07	209.422
DUF1612	Protein of unknown function (DUF1612)	157	2	0.000233571	1.12237e-06	208.105
TrbI_Ftype	Type-F conjugative transfer system protein (TrbI_Ftype)	411	7	0.000609059	2.993e-06	203.495
Decorin_bind	Decorin binding protein	50	0	7.53933e-05	3.74124e-07	201.519
Rac1	Rac1-binding domain	50	0	7.53933e-05	3.74124e-07	201.519
OspE	Borrelia outer surface protein E	50	0	7.53933e-05	3.74124e-07	201.519
Lipoprotein_1	Borrelia lipoprotein	50	0	7.53933e-05	3.74124e-07	201.519
DUF5513	Family of unknown function (DUF5513)	49	0	7.3915e-05	3.74124e-07	197.568
SyrA	Exopolysaccharide production repressor	49	0	7.3915e-05	3.74124e-07	197.568
TraV	Type IV conjugative transfer system lipoprotein (TraV)	639	12	0.000946112	4.86362e-06	194.528
TrbM	TrbM	144	2	0.000214353	1.12237e-06	190.982
KorB	KorB domain	140	2	0.00020844	1.12237e-06	185.714
DUF3560	Domain of unknown function (DUF3560)	371	7	0.000549927	2.993e-06	183.738
RepL	Firmicute plasmid replication protein (RepL)	45	0	6.80018e-05	3.74124e-07	181.762
YopE_N	YopE, N terminal	45	0	6.80018e-05	3.74124e-07	181.762
DUF2749	Protein of unknown function (DUF2749)	44	0	6.65235e-05	3.74124e-07	177.811
DUF5511	Family of unknown function (DUF5511)	44	0	6.65235e-05	3.74124e-07	177.811
KleE	Uncharacterized KleE stable inheritance protein	42	0	6.35669e-05	3.74124e-07	169.908
kleA_kleC	Uncharacterized KorC regulated protein A	40	0	6.06103e-05	3.74124e-07	162.006
RP-C	Replication protein C N-terminal domain	158	3	0.00023505	1.4965e-06	157.066
TFIIB	Transcription factor TFIIB repeat	37	0	5.61754e-05	3.74124e-07	150.152
TraL	TraL protein	606	15	0.000897328	5.986e-06	149.905
TraK	TraK protein	710	18	0.00105107	7.10836e-06	147.864
RolB_RolC	RolB/RolC glucosidase family	35	0	5.32188e-05	3.74124e-07	142.249
DUF5425	Family of unknown function (DUF5425)	34	0	5.17405e-05	3.74124e-07	138.298
Anthrax-tox_M	Anthrax toxin lethal factor, middle domain	34	0	5.17405e-05	3.74124e-07	138.298
Borrelia_REV	Borrelia burgdorferi REV protein	34	0	5.17405e-05	3.74124e-07	138.298
TraT	Enterobacterial TraT complement resistance protein	418	11	0.000619407	4.48949e-06	137.968
TraY	TraY domain	309	8	0.000458273	3.36712e-06	136.102
BAT	GAF and HTH_10 associated domain	33	0	5.02622e-05	3.74124e-07	134.346
pXO2-34	Family of unknown function	101	2	0.000150787	1.12237e-06	134.346
OMS28_porin	OMS28 porin	32	0	4.87839e-05	3.74124e-07	130.395
Replicase	Replicase family	261	7	0.000387314	2.993e-06	129.407
DUF1472	Protein of unknown function (DUF1472)	31	0	4.73056e-05	3.74124e-07	126.443
Prok-E2_D	Prokaryotic E2 family D	93	2	0.00013896	1.12237e-06	123.809
Lysis_col	Lysis protein	30	0	4.58273e-05	3.74124e-07	122.492
Antig_Caf1	Caf1 Capsule antigen	29	0	4.4349e-05	3.74124e-07	118.541
TraF	F plasmid transfer operon protein	1101	36	0.00162909	1.38426e-05	117.686
IPT	Isopentenyl transferase	28	0	4.28707e-05	3.74124e-07	114.589
DUF5417	Family of unknown function (DUF5417)	28	0	4.28707e-05	3.74124e-07	114.589
DUF5415	Family of unknown function (DUF5415)	28	0	4.28707e-05	3.74124e-07	114.589
DUF1403	Protein of unknown function (DUF1403)	83	2	0.000124177	1.12237e-06	110.638
pXO2-72	Uncharacterized protein pXO2-72	55	1	8.27848e-05	7.48249e-07	110.638
TBP	Transcription factor TFIID (or TATA-binding protein, TBP)	26	0	3.99141e-05	3.74124e-07	106.687
DUF3150	Protein of unknown function (DUF3150)	160	5	0.000238006	2.24475e-06	106.028
Colicin_im	Colicin immunity protein	25	0	3.84358e-05	3.74124e-07	102.735
TrbC_Ftype	Type-F conjugative transfer system pilin assembly protein	668	25	0.000988982	9.72723e-06	101.671
DUF2761	Protein of unknown function (DUF2761)	24	0	3.69575e-05	3.74124e-07	98.784
DUF5512	Family of unknown function (DUF5512)	48	1	7.24367e-05	7.48249e-07	96.8083
DUF1281	Protein of unknown function (DUF1281)	265	10	0.000393228	4.11537e-06	95.551
VirC1	VirC1 protein	95	3	0.000141917	1.4965e-06	94.8326
SpvD	Salmonella plasmid virulence protein SpvD	46	1	6.94801e-05	7.48249e-07	92.8569
Borrelia_P13	Borrelia membrane protein P13	69	2	0.000103481	1.12237e-06	92.1984
DUF2016	Domain of unknown function (DUF2016)	22	0	3.40009e-05	3.74124e-07	90.8812
TraE	TraE protein	721	31	0.00106733	1.1972e-05	89.1525
T4SS_TraI	Type IV secretory system, conjugal DNA-protein transfer	240	10	0.00035627	4.11537e-06	86.5707
DUF1616	Protein of unknown function (DUF1616)	20	0	3.10443e-05	3.74124e-07	82.9785
AvrPphF-ORF-2	AvrPphF-ORF-2	20	0	3.10443e-05	3.74124e-07	82.9785
DUF762	Coxiella burnetii protein of unknown function (DUF762)	20	0	3.10443e-05	3.74124e-07	82.9785
Colicin	Colicin pore forming domain	124	5	0.000184787	2.24475e-06	82.32
DotD	DotD protein	227	10	0.000337052	4.11537e-06	81.9009
Prok_Ub	Prokaryotic Ubiquitin	39	1	5.9132e-05	7.48249e-07	79.0272
DUF4165	Domain of unknown function (DUF4165)	19	0	2.9566e-05	3.74124e-07	79.0272
DUF807	Coxiella burnetii protein of unknown function (DUF807)	19	0	2.9566e-05	3.74124e-07	79.0272
LydB	LydA-holin antagonist	19	0	2.9566e-05	3.74124e-07	79.0272
DDE_Tnp_Tn3	Tn3 transposase DDE domain	2676	136	0.00395741	5.1255e-05	77.2101
NTP_transf_8	Nucleotidyltransferase	116	5	0.000172961	2.24475e-06	77.0515
Epsilon_antitox	Bacterial epsilon antitoxin	37	1	5.61754e-05	7.48249e-07	75.0758
alpha-hel2	Alpha-helical domain 2	18	0	2.80877e-05	3.74124e-07	75.0758
MbeB_N	MbeB-like, N-term conserved region	18	0	2.80877e-05	3.74124e-07	75.0758
R_equi_Vir	Rhodococcus equi virulence-associated protein	18	0	2.80877e-05	3.74124e-07	75.0758
Endotoxin_C	delta endotoxin	17	0	2.66094e-05	3.74124e-07	71.1244
E2R135	Coiled-coil receptor-binding R-domain of colicin E2	17	0	2.66094e-05	3.74124e-07	71.1244
YopH_N	YopH, N-terminal	105	5	0.0001567	2.24475e-06	69.8073
Cloacin	Colicin-like bacteriocin tRNase domain	52	2	7.83499e-05	1.12237e-06	69.8073
TraH	Conjugative relaxosome accessory transposon protein	716	40	0.00105994	1.53391e-05	69.1006
DUF5406	Family of unknown function (DUF5406)	50	2	7.53933e-05	1.12237e-06	67.1731
DDE_Tnp_IS240	DDE domain	4926	291	0.00728358	0.000109244	66.6724
FmrO	Ribosomal RNA methyltransferase (FmrO)	49	2	7.3915e-05	1.12237e-06	65.856
TrbH	Conjugal transfer protein TrbH	48	2	7.24367e-05	1.12237e-06	64.5388
VRP3	Salmonella virulence-associated 28kDa protein	64	3	9.60895e-05	1.4965e-06	64.2096
TrwC	TrwC relaxase	860	52	0.00127282	1.98286e-05	64.1909
DUF2688	Protein of unknown function (DUF2688)	15	0	2.36528e-05	3.74124e-07	63.2217
Lantibiotic_a	Lantibiotic alpha	15	0	2.36528e-05	3.74124e-07	63.2217
Sulfolobus_pRN	Sulfolobus plasmid regulatory protein	15	0	2.36528e-05	3.74124e-07	63.2217
RHH_6	Ribbon-helix-helix domain	94	5	0.000140438	2.24475e-06	62.5632
T4BSS_DotH_IcmK	Putative outer membrane core complex of type IVb secretion	233	14	0.000345922	5.61187e-06	61.6412
TraN	Type-1V conjugative transfer system mating pair stabilisation	666	42	0.000986026	1.60873e-05	61.292
MobC	Bacterial mobilisation protein (MobC)	317	20	0.000470099	7.85661e-06	59.8349
DUF3991	Protein of unknown function (DUF3991)	135	8	0.000201049	3.36712e-06	59.7094
DUF3701	Phage integrase protein	247	16	0.000366618	6.36011e-06	57.6433
DMSP_lyase	Dimethlysulfonioproprionate lyase	115	7	0.000171483	2.993e-06	57.2947
L_lactis_RepB_C	Lactococcus lactis RepB C-terminus	42	2	6.35669e-05	1.12237e-06	56.6361
T4SS	Type IV secretion system proteins	543	37	0.000804195	1.42167e-05	56.5668
MerE	MerE protein	242	16	0.000359227	6.36011e-06	56.4812
NodA	Nodulation protein A (NodA)	84	5	0.000125655	2.24475e-06	55.9776
DUF4158	Domain of unknown function (DUF4158)	480	33	0.000711062	1.27202e-05	55.9001
RepA1_leader	Tap RepA1 leader peptide	13	0	2.06962e-05	3.74124e-07	55.319
Gemini_AL1	Geminivirus Rep catalytic domain	13	0	2.06962e-05	3.74124e-07	55.319
Pilin_N	Archaeal Type IV pilin, N-terminal	13	0	2.06962e-05	3.74124e-07	55.319
PPR_1	PPR repeat	13	0	2.06962e-05	3.74124e-07	55.319
DNA_pol_B_2	DNA polymerase type B, organellar and viral	13	0	2.06962e-05	3.74124e-07	55.319
DUF3330	Domain of unknown function (DUF3330)	179	12	0.000266094	4.86362e-06	54.7111
DUF3967	Protein of unknown function (DUF3967)	149	10	0.000221745	4.11537e-06	53.8822
PriCT_1	Primase C terminal 1 (PriCT-1)	175	12	0.000260181	4.86362e-06	53.4953
Cloacin_immun	Cloacin immunity protein	53	3	7.98282e-05	1.4965e-06	53.3433
MccV	Microcin V bacteriocin	26	1	3.99141e-05	7.48249e-07	53.3433
StbA	StbA protein	497	36	0.000736193	1.38426e-05	53.1831
Plasmid_stab_B	Plasmid stability protein	388	28	0.000575058	1.08496e-05	53.0027
DUF3854	Domain of unknown function (DUF3854)	105	7	0.0001567	2.993e-06	52.3555
OspD	Borrelia outer surface protein D (OspD)	12	0	1.92179e-05	3.74124e-07	51.3677
GXWXG	GXWXG protein	37	2	5.61754e-05	1.12237e-06	50.0505
TrwB_AAD_bind	Type IV secretion-system coupling protein DNA-binding domain	982	78	0.00145317	2.95558e-05	49.1669
RepA_C	Plasmid encoded RepA protein	198	15	0.000294182	5.986e-06	49.145
T4SS_CagC	Cag pathogenicity island, type IV secretory system	48	3	7.24367e-05	1.4965e-06	48.4041
Mob_Pre	Plasmid recombination enzyme	324	26	0.000480447	1.01014e-05	47.5626
HTH_13	HTH DNA binding domain	11	0	1.77396e-05	3.74124e-07	47.4163
DUF5372	Family of unknown function (DUF5372)	11	0	1.77396e-05	3.74124e-07	47.4163
DUF1392	Protein of unknown function (DUF1392)	11	0	1.77396e-05	3.74124e-07	47.4163
Pim	Pesticin immunity protein	23	1	3.54792e-05	7.48249e-07	47.4163
Microcin	Colicin E1 (microcin) immunity protein	11	0	1.77396e-05	3.74124e-07	47.4163
Aminoglyc_resit	Aminoglycoside-2''-adenylyltransferase	35	2	5.32188e-05	1.12237e-06	47.4163
Replic_Relax	Replication-relaxation	241	20	0.000357748	7.85661e-06	45.5347
Endotoxin_N	delta endotoxin, N-terminal domain	22	1	3.40009e-05	7.48249e-07	45.4406
DUF4320	Domain of unknown function (DUF4320)	90	7	0.000134525	2.993e-06	44.9467
RepB	RepB plasmid partitioning protein	419	36	0.000620886	1.38426e-05	44.8533
Helicase_C_4	C-terminal domain on Strawberry notch homologue	66	5	9.90461e-05	2.24475e-06	44.1235
Colicin_Ia	Colicin Ia	10	0	1.62613e-05	3.74124e-07	43.4649
DdrB	DdrB-like protein	10	0	1.62613e-05	3.74124e-07	43.4649
VirD1	T-DNA border endonuclease VirD1	10	0	1.62613e-05	3.74124e-07	43.4649
DUF768	Protein of unknown function (DUF768)	10	0	1.62613e-05	3.74124e-07	43.4649
Endotoxin_mid	Bacillus thuringiensis delta-Endotoxin, middle domain	10	0	1.62613e-05	3.74124e-07	43.4649
DUF3659	Protein of unknown function (DUF3659)	10	0	1.62613e-05	3.74124e-07	43.4649
MxiM	Pilot protein MxiM	10	0	1.62613e-05	3.74124e-07	43.4649
IstB_IS21_ATP	IstB-like ATP binding N-terminal	10	0	1.62613e-05	3.74124e-07	43.4649
Cag12	Cag pathogenicity island protein Cag12	151	13	0.000224702	5.23774e-06	42.9005
Omega_Repress	Omega Transcriptional Repressor	42	3	6.35669e-05	1.4965e-06	42.4771
EcoRII-C	EcoRII C terminal	131	12	0.000195135	4.86362e-06	40.1215
DUF905	Bacterial protein of unknown function (DUF905)	536	52	0.000793847	1.98286e-05	40.0355
Enterotoxin_ST	Heat-stable enterotoxin ST	19	1	2.9566e-05	7.48249e-07	39.5136
MobA_MobL	MobA/MobL family	680	69	0.00100672	2.61887e-05	38.4411
TrbI	Bacterial conjugation TrbI-like protein	1533	162	0.00226771	6.09823e-05	37.1864
Secretin_N_2	Secretin N-terminal domain	144	15	0.000214353	5.986e-06	35.8092
RepB_primase	RepB DNA-primase from phage plasmid	17	1	2.66094e-05	7.48249e-07	35.5622
RepA_N	Replication initiator protein A (RepA) N-terminus	365	41	0.000541058	1.57132e-05	34.4333
DUF982	Protein of unknown function (DUF982)	337	38	0.000499665	1.45909e-05	34.2451
TraX	TraX protein	513	59	0.000759846	2.24475e-05	33.85
Relaxase	Relaxase/Mobilisation nuclease domain	943	110	0.00139551	4.15278e-05	33.6043
TrfA	TrfA protein	74	8	0.000110872	3.36712e-06	32.928
DUF995	Protein of unknown function (DUF995)	57	6	8.57414e-05	2.61887e-06	32.7398
AAA_34	P-loop containing NTP hydrolase pore-1	96	11	0.000143395	4.48949e-06	31.9401
Fimbrial_K88	Fimbrial, major and minor subunit	55	6	8.27848e-05	2.61887e-06	31.6109
TraC_F_IV	F pilus assembly Type-IV secretion system for plasmid transfer	714	89	0.00105698	3.36712e-05	31.3913
UPF0137	Uncharacterised protein family (UPF0137)	68	8	0.000102003	3.36712e-06	30.2937
Activator-TraM	Transcriptional activator TraM	45	5	6.80018e-05	2.24475e-06	30.2937
ATLF	Anthrax toxin lethal factor, N- and C-terminal domain	37	4	5.61754e-05	1.87062e-06	30.0303
NolX	NolX protein	37	4	5.61754e-05	1.87062e-06	30.0303
Clenterotox	Clostridium enterotoxin	14	1	2.21745e-05	7.48249e-07	29.6352
TraU	TraU protein	704	93	0.0010422	3.51677e-05	29.6352
DUF3085	Protein of unknown function (DUF3085)	125	16	0.000186266	6.36011e-06	29.2865
HisK_N	Histidine kinase N terminal	73	9	0.000109394	3.74124e-06	29.24
KfrA_N	Plasmid replication region DNA-binding N-term	457	61	0.000677061	2.31957e-05	29.1891
DUF992	Protein of unknown function (DUF992)	87	11	0.00013009	4.48949e-06	28.9766
Big_3_3	Bacterial Ig-like domain (group 3)	297	40	0.000440533	1.53391e-05	28.7196
MerT	MerT mercuric transport protein	266	36	0.000394706	1.38426e-05	28.5139
Antirestrict	Antirestriction protein	817	113	0.00120925	4.26502e-05	28.3527
DUF5462	Family of unknown function (DUF5462)	20	2	3.10443e-05	1.12237e-06	27.6595
PGDH_C	Phosphogluconate dehydrogenase (decarboxylating) C-term	69	9	0.000103481	3.74124e-06	27.6595
PcfJ	PcfJ-like protein	74	10	0.000110872	4.11537e-06	26.9411
TerY_C	TerY-C metal binding domain	60	8	9.01763e-05	3.36712e-06	26.7814
TraG_N	TraG-like protein, N-terminal region	737	110	0.00109098	4.15278e-05	26.2712
Y2_Tnp	Putative transposase	843	127	0.00124768	4.78879e-05	26.0543
RPA	Replication initiator protein A	242	36	0.000359227	1.38426e-05	25.9508
T4BSS_DotI_IcmL	Type-IV b secretion system, inner-membrane complex component	231	35	0.000342965	1.34685e-05	25.4643
PilM	PilM	164	25	0.000243919	9.72723e-06	25.0759
DUF3768	Protein of unknown function (DUF3768)	81	12	0.000121221	4.86362e-06	24.924
DUF3846	Domain of unknown function (DUF3846)	49	7	7.3915e-05	2.993e-06	24.696
DsbC_N	Disulfide bond isomerase protein N-terminus	99	15	0.00014783	5.986e-06	24.696
DUF4113	Domain of unknown function (DUF4113)	204	32	0.000303051	1.23461e-05	24.5463
DUF4913	Domain of unknown function (DUF4913)	61	9	9.16546e-05	3.74124e-06	24.4984
T4SS-DNA_transf	Type IV secretory system Conjugative DNA transfer	1018	168	0.00150639	6.3227e-05	23.8251
EcoRII-N	Restriction endonuclease EcoRII, N-terminal	11	1	1.77396e-05	7.48249e-07	23.7081
MmlI	Methylmuconolactone methyl-isomerase	11	1	1.77396e-05	7.48249e-07	23.7081
SNAP	Soluble NSF attachment protein, SNAP	11	1	1.77396e-05	7.48249e-07	23.7081
DUF2913	Protein of unknown function (DUF2913)	209	34	0.000310443	1.30944e-05	23.7081
Endonuclease_7	Recombination endonuclease VII	17	2	2.66094e-05	1.12237e-06	23.7081
ASRT	Anabaena sensory rhodopsin transducer	40	6	6.06103e-05	2.61887e-06	23.1437
RHH_5	CopG-like RHH_1 or ribbon-helix-helix domain, RHH_5	22	3	3.40009e-05	1.4965e-06	22.7203
CcdA	Post-segregation antitoxin CcdA	309	54	0.000458273	2.05768e-05	22.2713
DUF3095	Protein of unknown function (DUF3095)	66	11	9.90461e-05	4.48949e-06	22.0617
Zn_Tnp_IS91	Transposase zinc-binding domain	127	22	0.000189222	8.60486e-06	21.9902
RepC	Replication protein C (RepC)	49	8	7.3915e-05	3.36712e-06	21.952
Peptidase_C58	Yersinia/Haemophilus virulence surface antigen	53	9	7.98282e-05	3.74124e-06	21.3373
DUF1738	Domain of unknown function (DUF1738)	438	82	0.000648973	3.10523e-05	20.8994
DUF2726	Protein of unknown function (DUF2726)	323	61	0.000478969	2.31957e-05	20.649
HTH_7	Helix-turn-helix domain of resolvase	160	30	0.000238006	1.15979e-05	20.5216
ArdA	Antirestriction protein (ArdA)	310	59	0.000459751	2.24475e-05	20.4812
VirB8	VirB8 protein	770	148	0.00113977	5.57445e-05	20.4463
DUF736	Protein of unknown function (DUF736)	299	57	0.00044349	2.16992e-05	20.4381
DUF4111	Domain of unknown function (DUF4111)	392	75	0.000580972	2.84335e-05	20.4327
VirB3	Type IV secretory pathway, VirB3-like protein	534	104	0.00079089	3.92831e-05	20.1331
DUF536	Protein of unknown function, DUF536	167	32	0.000248354	1.23461e-05	20.116
CcdB	CcdB protein	309	60	0.000458273	2.28216e-05	20.0807
Flag1_repress	Repressor of phase-1 flagellin	65	12	9.75678e-05	4.86362e-06	20.0607
Colicin_M	Colicin M	19	3	2.9566e-05	1.4965e-06	19.7568
DUF2735	Protein of unknown function (DUF2735)	24	4	3.69575e-05	1.87062e-06	19.7568
LcrV	V antigen (LcrV) protein	48	9	7.24367e-05	3.74124e-06	19.3617
Methyltransf_17	S-adenosyl-L-methionine methyltransferase	43	8	6.50452e-05	3.36712e-06	19.3178
Peptidase_M27	Clostridial neurotoxin zinc protease	28	5	4.28707e-05	2.24475e-06	19.0982
Peptidase_S26	Signal peptidase, peptidase S26	379	78	0.000561754	2.95558e-05	19.0065
CagE_TrbE_VirB	CagE, TrbE, VirB family, component of type IV transporter system	753	156	0.00111464	5.87375e-05	18.9766
DUF2092	Predicted periplasmic protein (DUF2092)	46	9	6.94801e-05	3.74124e-06	18.5714
PapB	Adhesin biosynthesis transcription regulatory protein	83	17	0.000124177	6.73424e-06	18.4397
TcpQ	Toxin co-regulated pilus biosynthesis protein Q	218	46	0.000323747	1.75838e-05	18.4116
Resolvase	Resolvase, N terminal domain	4802	1033	0.00710027	0.000386845	18.3543
TrbL	TrbL/VirB6 plasmid conjugal transfer protein	804	173	0.00119003	6.50976e-05	18.2807
CagX	Conjugal transfer protein	803	177	0.00118855	6.65941e-05	17.8477
CBM60	Ca-dependent carbohydrate-binding module xylan-binding	26	5	3.99141e-05	2.24475e-06	17.7811
DUF2493	Protein of unknown function (DUF2493)	164	36	0.000243919	1.38426e-05	17.6209
YopD	YopD protein	48	10	7.24367e-05	4.11537e-06	17.6015
Shufflon_N	Bacterial shufflon protein, N-terminal constant region	186	41	0.000276442	1.57132e-05	17.593
LcrG	LcrG protein	47	10	7.09584e-05	4.11537e-06	17.2423
DUF763	Protein of unknown function (DUF763)	64	14	9.60895e-05	5.61187e-06	17.1226
TrbC	TrbC/VIRB2 family	651	151	0.000963851	5.68669e-05	16.9492
Prok-E2_E	Prokaryotic E2 family E	16	3	2.51311e-05	1.4965e-06	16.7933
TraD	Conjugal transfer protein TraD	278	66	0.000412446	2.50663e-05	16.4542
TfuA	TfuA-like protein	113	27	0.000168526	1.04755e-05	16.0877
MipZ	ATPase MipZ	132	32	0.000196614	1.23461e-05	15.9252
MbeD_MobD	MbeD/MobD like	19	4	2.9566e-05	1.87062e-06	15.8054
ParE-like_toxin	ParE-like toxin of type II bacterial toxin-antitoxin system	51	12	7.68716e-05	4.86362e-06	15.8054
Rnk_N	Rnk N-terminus	19	4	2.9566e-05	1.87062e-06	15.8054
DUF3994	Domain of unknown function (DUF3994)	11	2	1.77396e-05	1.12237e-06	15.8054
Type_III_YscX	Type III secretion system YscX (type_III_YscX)	47	11	7.09584e-05	4.48949e-06	15.8054
LcrR	Type III secretion system regulator (LcrR)	47	11	7.09584e-05	4.48949e-06	15.8054
DUF2933	Protein of unknown function (DUF2933)	163	40	0.000242441	1.53391e-05	15.8054
DUF3209	Protein of unknown function (DUF3209)	11	2	1.77396e-05	1.12237e-06	15.8054
T3SS_needle_reg	YopR, type III needle-polymerisation regulator	47	11	7.09584e-05	4.48949e-06	15.8054
Type_III_YscG	Bacterial type II secretion system chaperone protein (type_III_yscG)	47	11	7.09584e-05	4.48949e-06	15.8054
PilS	PilS N terminal	192	48	0.000285312	1.83321e-05	15.5635
DUF3018	Protein of unknown function (DUF3018)	58	14	8.72197e-05	5.61187e-06	15.542
ArsD	Arsenical resistance operon trans-acting repressor ArsD	183	46	0.000272007	1.75838e-05	15.4691
HA	Helicase associated domain	69	17	0.000103481	6.73424e-06	15.3664
DUF2391	Putative integral membrane protein (DUF2391)	30	7	4.58273e-05	2.993e-06	15.3115
DUF4236	Protein of unknown function (DUF4236)	111	28	0.000165569	1.08496e-05	15.2604
DUF1236	Protein of unknown function (DUF1236)	149	38	0.000221745	1.45909e-05	15.1975
DUF900	Alpha/beta hydrolase of unknown function (DUF900)	133	34	0.000198092	1.30944e-05	15.1281
DUF2634	Protein of unknown function (DUF2634)	155	40	0.000230615	1.53391e-05	15.0344
Arr-ms	Rifampin ADP-ribosyl transferase	74	19	0.000110872	7.48249e-06	14.8176
Binary_toxB_2	Clostridial binary toxin B/anthrax toxin PA domain 2	55	14	8.27848e-05	5.61187e-06	14.7517
DUF4942	Domain of unknown function (DUF4942)	364	98	0.000539579	3.70383e-05	14.5681
ToxN_toxin	Toxin ToxN, type III toxin-antitoxin system	21	5	3.25226e-05	2.24475e-06	14.4883
ERF	ERF superfamily	203	55	0.000301573	2.0951e-05	14.3942
DUF1561	Protein of unknown function (DUF1561)	46	12	6.94801e-05	4.86362e-06	14.2857
RHH_3	Ribbon-helix-helix domain	42	11	6.35669e-05	4.48949e-06	14.159
MerB	Alkylmercury lyase	85	23	0.000127134	8.979e-06	14.159
Toprim_3	Toprim domain	271	75	0.000402097	2.84335e-05	14.1417
DUF4392	Domain of unknown function (DUF4392)	24	6	3.69575e-05	2.61887e-06	14.112
ParD	Antitoxin ParD	20	5	3.10443e-05	2.24475e-06	13.8298
NodZ	Nodulation protein Z (NodZ)	13	3	2.06962e-05	1.4965e-06	13.8298
HEPN	HEPN domain	125	35	0.000186266	1.34685e-05	13.8298
DUF4400	Domain of unknown function (DUF4400)	193	55	0.00028679	2.0951e-05	13.6886
DUF1073	Protein of unknown function (DUF1073)	236	68	0.000350357	2.58146e-05	13.5721
Viral_helicase1	Viral (Superfamily 1) RNA helicase	64	18	9.60895e-05	7.10836e-06	13.5178
CbbQ_C	CbbQ/NirQ/NorQ C-terminal	57	16	8.57414e-05	6.36011e-06	13.4811
PrgI	PrgI family protein	91	26	0.000136003	1.01014e-05	13.4639
DUF3280	Protein of unknown function (DUF2380)	33	9	5.02622e-05	3.74124e-06	13.4346
DUF4417	Domain of unknown function (DUF4417)	16	4	2.51311e-05	1.87062e-06	13.4346
TniB	Bacterial TniB protein	245	72	0.000363662	2.73111e-05	13.3155
MerC	MerC mercury resistance protein	187	55	0.00027792	2.0951e-05	13.2653
RecA_dep_nuc	Recombination enhancement, RecA-dependent nuclease	29	8	4.4349e-05	3.36712e-06	13.1712
DUF2934	Protein of unknown function (DUF2934)	259	77	0.000384358	2.91817e-05	13.1712
Transport_MerF	Membrane transport protein MerF	32	9	4.87839e-05	3.74124e-06	13.0395
APH_6_hur	Aminoglycoside/hydroxyurea antibiotic resistance kinase	248	75	0.000368097	2.84335e-05	12.9459
DUF5338	Family of unknown function (DUF5338)	51	15	7.68716e-05	5.986e-06	12.8419
DUF269	Protein of unknown function, DUF269	77	23	0.000115307	8.979e-06	12.8419
TraG-D_C	TraM recognition site of TraD and TraG	258	79	0.000382879	2.99299e-05	12.7925
DUF5065	Domain of unknown function (DUF5065)	28	8	4.28707e-05	3.36712e-06	12.7322
AAA_10	AAA-like domain	259	80	0.000384358	3.03041e-05	12.6834
HTH_29	Winged helix-turn helix	235	73	0.000348879	2.76852e-05	12.6016
NifT	NifT/FixU protein	69	21	0.000103481	8.23074e-06	12.5725
PcfK	PcfK-like protein	18	5	2.80877e-05	2.24475e-06	12.5126
ATPgrasp_Ter	ATP-grasp in the biosynthetic pathway with Ter operon	75	23	0.000112351	8.979e-06	12.5126
Rep_2	Plasmid replication protein	100	31	0.000149308	1.1972e-05	12.4715
DDE_Tnp_IS66_C	IS66 C-terminal element	141	44	0.000209918	1.68356e-05	12.4687
SNase	Staphylococcal nuclease homologue	753	240	0.00111464	9.0164e-05	12.3623
TraI_2	Putative helicase	199	63	0.00029566	2.3944e-05	12.348
VRP1	Salmonella virulence plasmid 28.1kDa A protein	52	16	7.83499e-05	6.36011e-06	12.3189
DUF4238	Protein of unknown function (DUF4238)	92	29	0.000137482	1.12237e-05	12.2492
HTH_Tnp_IS1	InsA C-terminal domain	932	306	0.00137925	0.000114856	12.0085
AAA_31	AAA domain	4547	1497	0.00672331	0.000560438	11.9965
Carbam_trans_N	Carbamoyltransferase N-terminus	102	33	0.000152265	1.27202e-05	11.9703
Rop-like	Rop-like	53	17	7.98282e-05	6.73424e-06	11.8541
DUF2048	Abhydrolase domain containing 18	11	3	1.77396e-05	1.4965e-06	11.8541
GSH_synth_ATP	Eukaryotic glutathione synthase, ATP binding domain	11	3	1.77396e-05	1.4965e-06	11.8541
MUG113	Meiotically up-regulated gene 113	11	3	1.77396e-05	1.4965e-06	11.8541
FAD_binding_8	FAD-binding domain	11	3	1.77396e-05	1.4965e-06	11.8541
Peptidase_M30	Peptidase M30	17	5	2.66094e-05	2.24475e-06	11.8541
WGR	WGR domain	193	64	0.00028679	2.43181e-05	11.7933
Zeta_toxin	Zeta toxin	230	77	0.000341487	2.91817e-05	11.7021
Zn_Tnp_IS1	InsA N-terminal domain	31	10	4.73056e-05	4.11537e-06	11.4949
ETX_MTX2	Clostridium epsilon toxin ETX/Bacillus mosquitocidal toxin MTX2	28	9	4.28707e-05	3.74124e-06	11.4589
Pesticin	Bacterial toxin homologue of phage lysozyme, C-term	25	8	3.84358e-05	3.36712e-06	11.415
PAP_PilO	Pilin accessory protein (PilO)	198	68	0.000294182	2.58146e-05	11.3959
DUF932	Domain of unknown function (DUF932)	524	182	0.000776107	6.84648e-05	11.3359
GAD-like	GAD-like domain	36	12	5.46971e-05	4.86362e-06	11.2462
DUF4384	Domain of unknown function (DUF4384)	21	7	3.25226e-05	2.993e-06	10.8662
vWA-TerF-like	vWA found in TerF C terminus	83	30	0.000124177	1.15979e-05	10.7069
Cu-oxidase	Multicopper oxidase	50	18	7.53933e-05	7.10836e-06	10.6063
Acetyltransf_14	YopJ Serine/Threonine acetyltransferase	71	26	0.000106438	1.01014e-05	10.537
EspG	EspG protein	12	4	1.92179e-05	1.87062e-06	10.2735
Cys_rich_FGFR	Cysteine rich repeat	12	4	1.92179e-05	1.87062e-06	10.2735
CaiF_GrlA	CaiF/GrlA transcriptional regulator	89	34	0.000133047	1.30944e-05	10.1606
Gp49	Phage derived protein Gp49-like (DUF891)	499	197	0.00073915	7.40766e-05	9.97818
TpcC	Conjugative transposon protein TcpC	122	48	0.000181831	1.83321e-05	9.91872
FaeA	FaeA-like protein	54	21	8.13065e-05	8.23074e-06	9.8784
TnpB_IS66	IS66 Orf2 like protein	1309	529	0.00193657	0.000198286	9.76656
Lysozyme_like	Lysozyme-like	211	86	0.0003134	3.25488e-05	9.6286
Atu4866	Agrobacterium tumefaciens protein Atu4866	45	18	6.80018e-05	7.10836e-06	9.56645
DUF2637	Protein of unknown function (DUF2637)	69	28	0.000103481	1.08496e-05	9.53776
Multi_ubiq	Multiubiquitin	23	9	3.54792e-05	3.74124e-06	9.48326
Imm70	Immunity protein 70	11	4	1.77396e-05	1.87062e-06	9.48326
Colicin-DNase	DNase/tRNase domain of colicin-like bacteriocin	54	22	8.13065e-05	8.60486e-06	9.4489
ParBc	ParB-like nuclease domain	2076	869	0.00307043	0.000325488	9.4333
DDE_Tnp_ISAZ013	Rhodopirellula transposase DDE domain	30	12	4.58273e-05	4.86362e-06	9.42247
CopG_antitoxin	CopG antitoxin of type II toxin-antitoxin system	18	7	2.80877e-05	2.993e-06	9.38448
DDE_Tnp_IS66	Transposase IS66 family	1668	709	0.00246728	0.000265628	9.28847
DUF4082	Domain of unknown function (DUF4082)	60	25	9.01763e-05	9.72723e-06	9.27049
HHA	Haemolysin expression modulating protein	501	213	0.000742106	8.00626e-05	9.26907
Glyco_transf_92	Glycosyltransferase family 92	20	8	3.10443e-05	3.36712e-06	9.21984
RNA_lig_T4_1	RNA ligase	13	5	2.06962e-05	2.24475e-06	9.21984
DUF3606	Protein of unknown function (DUF3606)	97	42	0.000144873	1.60873e-05	9.00542
Lactococcin_972	Bacteriocin (Lactococcin_972)	42	18	6.35669e-05	7.10836e-06	8.94255
PRTase_2	Phosphoribosyl transferase	94	41	0.000140438	1.57132e-05	8.9376
PRTase_1	Phosphoribosyl transferase (PRTase)	98	43	0.000146352	1.64615e-05	8.89056
Phage_TAC_14	Phage tail assembly chaperone protein, TAC	17	7	2.66094e-05	2.993e-06	8.89056
DUF3902	Protein of unknown function (DUF3902)	26	11	3.99141e-05	4.48949e-06	8.89056
IpaB_EvcA	IpaB/EvcA family	26	11	3.99141e-05	4.48949e-06	8.89056
FidL_like	FidL-like putative membrane protein	19	8	2.9566e-05	3.36712e-06	8.7808
HTH_OrfB_IS605	Helix-turn-helix domain	199	89	0.00029566	3.36712e-05	8.7808
DDE_Tnp_IS1	IS1 transposase	1074	483	0.00158917	0.000181076	8.77626
HTH_Mga	M protein trans-acting positive regulator (MGA) HTH domain	30	13	4.58273e-05	5.23774e-06	8.74944
Beta-lactamase2	Beta-lactamase enzyme family	947	431	0.00140143	0.000161622	8.67104
DUF2384	Protein of unknown function (DUF2384)	279	127	0.000413924	4.78879e-05	8.6436
Peptidase_M91	Effector protein	12	5	1.92179e-05	2.24475e-06	8.56128
CBP_BcsN	Cellulose biosynthesis protein BcsN	12	5	1.92179e-05	2.24475e-06	8.56128
DUF354	Protein of unknown function (DUF354)	12	5	1.92179e-05	2.24475e-06	8.56128
DndB	DNA-sulfur modification-associated	92	42	0.000137482	1.60873e-05	8.54596
DUF930	Domain of Unknown Function (DUF930)	27	12	4.13924e-05	4.86362e-06	8.51062
YqbF	YqbF, hypothetical protein domain	14	6	2.21745e-05	2.61887e-06	8.4672
DUF5086	Domain of unknown function (DUF5086)	18	8	2.80877e-05	3.36712e-06	8.34176
ROS_MUCR	ROS/MUCR transcriptional regulator protein	192	91	0.000285312	3.44194e-05	8.28926
DUF4326	Domain of unknown function (DUF4326)	22	10	3.40009e-05	4.11537e-06	8.26193
RES	RES domain	473	226	0.000700714	8.49262e-05	8.25085
HTH_23	Homeodomain-like domain	101	48	0.000150787	1.83321e-05	8.22528
DNA_pol3_theta	DNA polymerase III, theta subunit	220	106	0.000326704	4.00313e-05	8.16122
TniQ	TniQ	162	78	0.000240963	2.95558e-05	8.1528
ParE_toxin	ParE toxin of type II toxin-antitoxin system, parDE	1048	522	0.00155074	0.000195667	7.92538
Hypoth_Ymh	Protein of unknown function (Hypoth_ymh)	31	15	4.73056e-05	5.986e-06	7.90272
KNTase_C	KNTase C-terminal domain	15	7	2.36528e-05	2.993e-06	7.90272
DUF4379	Probable Zinc-ribbon domain	25	12	3.84358e-05	4.86362e-06	7.90272
Phage_TTP_13	Phage tail tube protein family	17	8	2.66094e-05	3.36712e-06	7.90272
Thg1	tRNAHis guanylyltransferase	11	5	1.77396e-05	2.24475e-06	7.90272
CzcE	Heavy-metal resistance protein CzcE	11	5	1.77396e-05	2.24475e-06	7.90272
LRV	Leucine rich repeat variant	11	5	1.77396e-05	2.24475e-06	7.90272
LZ_Tnp_IS66	Transposase C of IS166 homeodomain	97	48	0.000144873	1.83321e-05	7.90272
Acetyltransf_8	Acetyltransferase (GNAT) domain	384	194	0.000569145	7.29543e-05	7.8014
DUF2249	Uncharacterized conserved protein (DUF2249)	111	56	0.000165569	2.13251e-05	7.76407
PRiA4_ORF3	Plasmid pRiA4b ORF-3-like protein	193	98	0.00028679	3.70383e-05	7.74307
Phage_int_SAM_4	Phage integrase, N-terminal SAM-like domain	87	44	0.00013009	1.68356e-05	7.7271
Rad52_Rad22	Rad52/22 family double-strand break repair protein	30	15	4.58273e-05	5.986e-06	7.65576
DUF1109	Protein of unknown function (DUF1109)	90	46	0.000134525	1.75838e-05	7.6505
DUF4334	Domain of unknown function (DUF4334)	51	26	7.68716e-05	1.01014e-05	7.61002
DUF3175	Protein of unknown function (DUF3175)	45	23	6.80018e-05	8.979e-06	7.57344
DUF2231	Predicted membrane protein (DUF2231)	64	33	9.60895e-05	1.27202e-05	7.55407
TIR-like	Predicted nucleotide-binding protein containing TIR-like domain	39	20	5.9132e-05	7.85661e-06	7.5264
YafQ_toxin	Bacterial toxin of type II toxin-antitoxin system, YafQ	197	103	0.000292703	3.89089e-05	7.52278
RelB	RelB antitoxin	376	198	0.000557319	7.44507e-05	7.48574
LRR_6	Leucine Rich repeat	50	26	7.53933e-05	1.01014e-05	7.46368
Peptidase_S74	Chaperone of endosialidase	50	26	7.53933e-05	1.01014e-05	7.46368
HTH_43	Winged helix-turn helix	93	49	0.00013896	1.87062e-05	7.42855
TypeIII_RM_meth	Type III restriction/modification enzyme methylation subunit	14	7	2.21745e-05	2.993e-06	7.4088
Tyrosinase	Common central domain of tyrosinase	57	30	8.57414e-05	1.15979e-05	7.39286
DUF2243	Predicted membrane protein (DUF2243)	42	22	6.35669e-05	8.60486e-06	7.38732
MazE_antitoxin	Antidote-toxin recognition MazE, bacterial antitoxin	494	264	0.000731758	9.9143e-05	7.38084
Mu-transpos_C	Mu transposase, C-terminal	53	28	7.98282e-05	1.08496e-05	7.3577
DUF2201_N	Putative metallopeptidase domain	38	20	5.76537e-05	7.85661e-06	7.33824
zf-IS66	zinc-finger binding domain of transposase IS66	36	19	5.46971e-05	7.48249e-06	7.31001
DUF1932	Domain of unknown function (DUF1932)	60	32	9.01763e-05	1.23461e-05	7.30403
GramPos_pilinBB	Gram-positive pilin backbone subunit 2, Cna-B-like domain	47	25	7.09584e-05	9.72723e-06	7.29481
CAT	Chloramphenicol acetyltransferase	135	73	0.000201049	2.76852e-05	7.26196
Bacteriocin_IIi	Aureocin-like type II bacteriocin	10	5	1.62613e-05	2.24475e-06	7.24416
DUF1357_C	Putative nucleotide-binding of sugar-metabolising enzyme	41	22	6.20886e-05	8.60486e-06	7.21552
HTH_37	Helix-turn-helix domain	285	156	0.000422794	5.87375e-05	7.19802
NifQ	NifQ	53	29	7.98282e-05	1.12237e-05	7.11244
DDE_Tnp_1_5	Transposase DDE domain	868	482	0.00128464	0.000180702	7.10917
Glyco_trans_4_3	Gkycosyl transferase family 4 group	42	23	6.35669e-05	8.979e-06	7.07952
Prok-E2_A	Prokaryotic E2 family A	15	8	2.36528e-05	3.36712e-06	7.02464
PDDEXK_2	PD-(D/E)XK nuclease family transposase	226	127	0.000335574	4.78879e-05	7.00749
Peptidase_S6	Immunoglobulin A1 protease	105	59	0.0001567	2.24475e-05	6.98073
BsuBI_PstI_RE	BsuBI/PstI restriction endonuclease C-terminus	20	11	3.10443e-05	4.48949e-06	6.91488
TcdA_TcdB	TcdA/TcdB catalytic glycosyltransferase domain	34	19	5.17405e-05	7.48249e-06	6.91488
SpvB	Salmonella virulence plasmid 65kDa B protein	55	31	8.27848e-05	1.1972e-05	6.91488
MoCo_carrier	Putative molybdenum carrier	13	7	2.06962e-05	2.993e-06	6.91488
Glyco_trans_1_2	Glycosyl transferases group 1	211	121	0.0003134	4.56432e-05	6.86629
CaMKII_AD	Calcium/calmodulin dependent protein kinase II association domain	44	25	6.65235e-05	9.72723e-06	6.83889
Omptin	Omptin family	111	64	0.000165569	2.43181e-05	6.80849
ptaRNA1_toxin	Toxin of toxin-antitoxin type 1 system	11	6	1.77396e-05	2.61887e-06	6.77376
DUF1484	Protein of unknown function (DUF1484)	11	6	1.77396e-05	2.61887e-06	6.77376
DUF3363	Protein of unknown function (DUF3363)	99	58	0.00014783	2.20733e-05	6.69722
ParD_antitoxin	Bacterial antitoxin of ParD toxin-antitoxin type II system and RHH	214	126	0.000317834	4.75138e-05	6.68931
TraF_2	F plasmid transfer operon, TraF, protein	117	69	0.000174439	2.61887e-05	6.66086
DUF3958	Protein of unknown function (DUF3958)	14	8	2.21745e-05	3.36712e-06	6.5856
Cad	Cadmium resistance transporter	157	94	0.000233571	3.55418e-05	6.57173
AbiEii	Nucleotidyl transferase AbiEii toxin, Type IV TA system	353	213	0.000523318	8.00626e-05	6.53636
DUF1643	Protein of unknown function (DUF1643)	101	61	0.000150787	2.31957e-05	6.50062
SIR2_2	SIR2-like domain	245	150	0.000363662	5.64928e-05	6.43731
YolD	YolD-like protein	170	104	0.000252789	3.92831e-05	6.43507
RTX	RTX N-terminal domain	51	31	7.68716e-05	1.1972e-05	6.42096
Ter	DNA replication terminus site-binding protein (Ter protein)	189	116	0.000280877	4.37726e-05	6.41674
NifW	Nitrogen fixation protein NifW	41	25	6.20886e-05	9.72723e-06	6.38296
DUF305	Domain of unknown function (DUF305)	296	183	0.000439055	6.88389e-05	6.37801
DUF4343	Domain of unknown function (DUF4343)	15	9	2.36528e-05	3.74124e-06	6.32217
NifZ	NifZ domain	47	29	7.09584e-05	1.12237e-05	6.32217
CobT	Cobalamin biosynthesis protein CobT	23	14	3.54792e-05	5.61187e-06	6.32217
TerB_N	TerB N-terminal domain	50	31	7.53933e-05	1.1972e-05	6.29748
DNA_ligase_A_M	ATP dependent DNA ligase domain	320	202	0.000474534	7.59472e-05	6.24821
NERD	Nuclease-related domain	214	135	0.000317834	5.08809e-05	6.24663
HemolysinCabind	Haemolysin-type calcium-binding repeat (2 copies)	315	200	0.000467143	7.5199e-05	6.21209
Cytotoxic	Cytotoxic	10	6	1.62613e-05	2.61887e-06	6.20928
NTP_transf_2	Nucleotidyltransferase domain	219	140	0.000325226	5.27515e-05	6.16524
DUF2808	Protein of unknown function (DUF2808)	13	8	2.06962e-05	3.36712e-06	6.14656
HWE_HK	HWE histidine kinase	123	79	0.000183309	2.99299e-05	6.1246
DUF2291	Predicted periplasmic lipoprotein (DUF2291)	78	50	0.000116786	1.90803e-05	6.12073
DUF4096	Putative transposase of IS4/5 family (DUF4096)	1060	684	0.00156848	0.000256275	6.12028
PIN	PIN domain	1241	802	0.00183605	0.000300422	6.11156
GHL6	Hypothetical glycosyl hydrolase 6	16	10	2.51311e-05	4.11537e-06	6.10664
Toprim_2	Toprim-like	121	78	0.000180353	2.95558e-05	6.1021
DUF3692	CRISPR-associated protein	19	12	2.9566e-05	4.86362e-06	6.07901
DDE_Tnp_1_4	Transposase DDE domain group 1	582	378	0.000861848	0.000141793	6.07821
DUF5060	Domain of unknown function (DUF5060)	22	14	3.40009e-05	5.61187e-06	6.05875
HNH_2	HNH endonuclease	51	33	7.68716e-05	1.27202e-05	6.04325
DUF4135	Domain of unknown function (DUF4135)	51	33	7.68716e-05	1.27202e-05	6.04325
CARDB	CARDB	28	18	4.28707e-05	7.10836e-06	6.03102
HicA_toxin	HicA toxin of bacterial toxin-antitoxin,	186	122	0.000276442	4.60173e-05	6.00735
DUF2591	Protein of unknown function (DUF2591)	55	36	8.27848e-05	1.38426e-05	5.98043
CopB	Copper resistance protein B precursor (CopB)	176	116	0.000261659	4.37726e-05	5.9777
Ftsk_gamma	Ftsk gamma domain	79	52	0.000118264	1.98286e-05	5.96431
HigB-like_toxin	RelE-like toxin of type II toxin-antitoxin system HigB	160	106	0.000238006	4.00313e-05	5.9455
Ferritin-like	Ferritin-like	44	29	6.65235e-05	1.12237e-05	5.92704
L_biotic_typeA	Type-A lantibiotic	11	7	1.77396e-05	2.993e-06	5.92704
Toprim_Crpt	C-terminal repeat of topoisomerase	20	13	3.10443e-05	5.23774e-06	5.92704
DUF4878	Domain of unknown function (DUF4878)	26	17	3.99141e-05	6.73424e-06	5.92704
Polysacc_lyase	Polysaccharide lyase	29	19	4.4349e-05	7.48249e-06	5.92704
DDE_Tnp_1_2	Transposase DDE domain	635	424	0.000940198	0.000159003	5.91309
Tape_meas_lam_C	Lambda phage tail tape-measure protein (Tape_meas_lam_C)	69	46	0.000103481	1.75838e-05	5.885
DUF2791	P-loop Domain of unknown function (DUF2791)	58	39	8.72197e-05	1.4965e-05	5.82825
PhdYeFM_antitox	Antitoxin Phd_YefM, type II toxin-antitoxin system	751	509	0.00111168	0.000190803	5.82632
C-C_Bond_Lyase	C-C_Bond_Lyase of the TIM-Barrel fold	77	52	0.000115307	1.98286e-05	5.81521
OrfB_IS605	Probable transposase	528	359	0.00078202	0.000134685	5.8063
DUF4272	Domain of unknown function (DUF4272)	21	14	3.25226e-05	5.61187e-06	5.79533
IstB_IS21	IstB-like ATP binding protein	1710	1167	0.00252937	0.000436977	5.78833
RVT_1	Reverse transcriptase (RNA-dependent DNA polymerase)	1181	808	0.00174735	0.000302667	5.77318
HTH_Tnp_1	Transposase	4496	3083	0.00664791	0.0011538	5.76176
YscO	Type III secretion protein YscO	54	37	8.13065e-05	1.42167e-05	5.71907
DUF411	Protein of unknown function, DUF	255	176	0.000378445	6.622e-05	5.71496
DUF4406	Domain of unknown function (DUF4406)	25	17	3.84358e-05	6.73424e-06	5.70752
Amidase_5	Bacteriophage peptidoglycan hydrolase	12	8	1.92179e-05	3.36712e-06	5.70752
Porin_2	Porin subfamily	62	43	9.31329e-05	1.64615e-05	5.65763
Cas_Cmr3	CRISPR-associated protein (Cas_Cmr3)	19	13	2.9566e-05	5.23774e-06	5.6448
HTH_21	HTH-like domain	521	366	0.000771672	0.000137304	5.62019
DUF922	Bacterial protein of unknown function (DUF922)	33	23	5.02622e-05	8.979e-06	5.59776
DUF3895	Protein of unknown function (DUF3895)	16	11	2.51311e-05	4.48949e-06	5.59776
Antibiotic_NAT	Aminoglycoside 3-N-acetyltransferase	133	94	0.000198092	3.55418e-05	5.57349
RHH_1	Ribbon-helix-helix protein, copG family	214	152	0.000317834	5.7241e-05	5.55256
DUF1217	Protein of unknown function (DUF1217)	34	24	5.17405e-05	9.35311e-06	5.5319
Autoind_synth	Autoinducer synthase	160	114	0.000238006	4.30243e-05	5.5319
PMM	Eukaryotic phosphomannomutase	13	9	2.06962e-05	3.74124e-06	5.5319
PSK_trans_fac	Rv0623-like transcription factor	95	68	0.000141917	2.58146e-05	5.49754
PIN_3	PIN domain	211	152	0.0003134	5.7241e-05	5.47508
DUF2251	Uncharacterized protein conserved in bacteria (DUF2251)	17	12	2.66094e-05	4.86362e-06	5.47111
ProQ	ProQ/FINO family	291	210	0.000431663	7.89402e-05	5.46823
Dehydratase_hem	Haem-containing dehydratase	10	7	1.62613e-05	2.993e-06	5.43312
Phage_Integr_2	Putative phage integrase	10	7	1.62613e-05	2.993e-06	5.43312
Acetone_carb_G	Acetone carboxylase gamma subunit	21	15	3.25226e-05	5.986e-06	5.43312
NUMOD4	NUMOD4 motif	21	15	3.25226e-05	5.986e-06	5.43312
Peptidase_M66	Peptidase M66	43	31	6.50452e-05	1.1972e-05	5.43312
EHN	Epoxide hydrolase N terminus	98	71	0.000146352	2.6937e-05	5.43312
Peptidase_U49	Peptidase U49	10	7	1.62613e-05	2.993e-06	5.43312
CobT_C	Cobalamin biosynthesis protein CobT VWA domain	80	58	0.000119742	2.20733e-05	5.42475
DDE_5	DDE superfamily endonuclease	391	285	0.000579493	0.000107	5.41585
DUF1778	Protein of unknown function (DUF1778)	300	219	0.000444968	8.23074e-05	5.40618
TcpE	TcpE family	59	43	8.8698e-05	1.64615e-05	5.38822
DUF3422	Protein of unknown function (DUF3422)	63	46	9.46112e-05	1.75838e-05	5.38057
AA_synth	Amino acid synthesis	101	74	0.000150787	2.80593e-05	5.37385
DUF916	Bacterial protein of unknown function (DUF916)	45	33	6.80018e-05	1.27202e-05	5.34595
OrfB_Zn_ribbon	Putative transposase DNA-binding domain	435	323	0.000644539	0.000121216	5.31726
GYD	GYD domain	38	28	5.76537e-05	1.08496e-05	5.3139
ADPrib_exo_Tox	ADP-ribosyltransferase exoenzyme	54	40	8.13065e-05	1.53391e-05	5.3006
Peptidase_C14	Caspase domain	117	87	0.000174439	3.29229e-05	5.29841
DUF2399	Protein of unknown function C-terminus (DUF2399)	11	8	1.77396e-05	3.36712e-06	5.26848
DUF1822	Protein of unknown function (DUF1822)	15	11	2.36528e-05	4.48949e-06	5.26848
ERCC4	ERCC4 domain	23	17	3.54792e-05	6.73424e-06	5.26848
DUF2264	Uncharacterized protein conserved in bacteria (DUF2264)	72	54	0.000107916	2.05768e-05	5.24453
DUF3883	Domain of unknown function (DUF3883)	56	42	8.42631e-05	1.60873e-05	5.23785
Tad	Putative Flp pilus-assembly TadE/G-like	89	67	0.000133047	2.54405e-05	5.22974
DUF2161	Putative PD-(D/E)XK phosphodiesterase (DUF2161)	32	24	4.87839e-05	9.35311e-06	5.21579
RRXRR	RRXRR protein	32	24	4.87839e-05	9.35311e-06	5.21579
DDE_Tnp_1	Transposase DDE domain	2984	2262	0.00441272	0.000846643	5.21202
Ku	Ku70/Ku80 beta-barrel domain	217	165	0.000322269	6.21046e-05	5.18913
FixP_N	N-terminal domain of cytochrome oxidase-cbb3, FixP	59	45	8.8698e-05	1.72097e-05	5.15395
AbiEi_4	Transcriptional regulator, AbiEi antitoxin	42	32	6.35669e-05	1.23461e-05	5.14874
DUF2270	Predicted integral membrane protein (DUF2270)	12	9	1.92179e-05	3.74124e-06	5.13677
PI-PLC-C1	Phosphoinositide phospholipase C, Ca2+-dependent	25	19	3.84358e-05	7.48249e-06	5.13677
HTH_32	Homeodomain-like domain	181	140	0.000269051	5.27515e-05	5.10033
DUF1863	MTH538 TIR-like domain (DUF1863)	57	44	8.57414e-05	1.68356e-05	5.09286
PT-TG	Pre-toxin TG	17	13	2.66094e-05	5.23774e-06	5.08032
IMS_C	impB/mucB/samB family C-terminal domain	76	59	0.000113829	2.24475e-05	5.07091
DUF1326	Protein of unknown function (DUF1326)	49	38	7.3915e-05	1.45909e-05	5.06584
TyeA	TyeA	50	39	7.53933e-05	1.4965e-05	5.03798
DNA_ligase_A_C	ATP dependent DNA ligase C terminal region	23	18	3.54792e-05	7.10836e-06	4.99119
Phage_gp49_66	Phage protein (N4 Gp49/phage Sf6 gene 66) family	28	22	4.28707e-05	8.60486e-06	4.98215
DUF4173	Domain of unknown function (DUF4173)	33	26	5.02622e-05	1.01014e-05	4.97578
DUF3800	Protein of unknown function (DUF3800)	82	65	0.000122699	2.46922e-05	4.96913
HTH_38	Helix-turn-helix domain	919	731	0.00136004	0.000273859	4.96619
IMS	impB/mucB/samB family	1181	941	0.00174735	0.000352425	4.95807
HlyC	RTX toxin acyltransferase family	73	58	0.000109394	2.20733e-05	4.95594
DUF3956	Protein of unknown function (DUF3956)	14	11	2.21745e-05	4.48949e-06	4.9392
Bacillus_HBL	Bacillus haemolytic enterotoxin (HBL)	90	72	0.000134525	2.73111e-05	4.92567
EF-hand_7	EF-hand domain pair	25	20	3.84358e-05	7.85661e-06	4.89216
PrlF_antitoxin	prlF antitoxin for toxin YhaV_toxin	67	54	0.000100524	2.05768e-05	4.88532
Fer4_NifH	4Fe-4S iron sulfur cluster binding proteins, NifH/frxC family	130	105	0.000193657	3.96572e-05	4.88328
Chrome_Resist	Chromate resistance exported protein	84	68	0.000125655	2.58146e-05	4.86761
AAA_13	AAA domain	106	86	0.000158178	3.25488e-05	4.85972
CesT	Tir chaperone protein (CesT) family	200	163	0.000297138	6.13564e-05	4.84282
DUF4168	Domain of unknown function (DUF4168)	32	26	4.87839e-05	1.01014e-05	4.82944
DUF499	Protein of unknown function (DUF499)	32	26	4.87839e-05	1.01014e-05	4.82944
DUF4263	Domain of unknown function (DUF4263)	32	26	4.87839e-05	1.01014e-05	4.82944
Peptidase_C48	Ulp1 protease family, C-terminal catalytic domain	49	40	7.3915e-05	1.53391e-05	4.81873
DnaA_N	DnaA N-terminal domain	33	27	5.02622e-05	1.04755e-05	4.79808
TerD	TerD domain	392	324	0.000580972	0.00012159	4.7781
EF-hand_6	EF-hand domain	11	9	1.77396e-05	3.74124e-06	4.74163
DUF1071	Protein of unknown function (DUF1071)	11	9	1.77396e-05	3.74124e-06	4.74163
TetR_C	Tetracyclin repressor, C-terminal all-alpha domain	279	234	0.000413924	8.79192e-05	4.708
ArsA_ATPase	Anion-transporting ATPase	248	208	0.000368097	7.8192e-05	4.7076
DUF3757	Protein of unknown function (DUF3757)	24	20	3.69575e-05	7.85661e-06	4.704
CusF_Ec	Copper binding periplasmic protein CusF	228	192	0.00033853	7.2206e-05	4.6884
HicB	HicB family	101	85	0.000150787	3.21747e-05	4.68649
Pectate_lyase	Pectate lyase	25	21	3.84358e-05	8.23074e-06	4.66979
DUF2281	Protein of unknown function (DUF2281)	12	10	1.92179e-05	4.11537e-06	4.66979
PemK_toxin	PemK-like, MazF-like toxin of type II toxin-antitoxin system	527	446	0.000780542	0.000167234	4.66738
RuBisCO_large	Ribulose bisphosphate carboxylase large chain, catalytic domain	123	104	0.000183309	3.92831e-05	4.66637
DUF4259	Domain of unknown function (DUF4259)	19	16	2.9566e-05	6.36011e-06	4.64866
HTH_28	Helix-turn-helix domain	521	443	0.000771672	0.000166111	4.64552
Histone_HNS	H-NS histone family	644	548	0.000953503	0.000205394	4.64231
Transposase_20	Transposase IS116/IS110/IS902 family	1486	1265	0.00219823	0.000473641	4.64113
Mrr_cat	Restriction endonuclease	295	252	0.000437577	9.46535e-05	4.62293
DUF3796	Protein of unknown function (DUF3796)	13	11	2.06962e-05	4.48949e-06	4.60992
NPP1	Necrosis inducing protein (NPP1)	13	11	2.06962e-05	4.48949e-06	4.60992
Abi_C	Abortive infection C-terminus	28	24	4.28707e-05	9.35311e-06	4.58358
DUF1187	Protein of unknown function (DUF1187)	21	18	3.25226e-05	7.10836e-06	4.57526
Sulfotransfer_1	Sulfotransferase domain	44	38	6.65235e-05	1.45909e-05	4.55926
Fic_N	Fic/DOC family N-terminal	75	65	0.000112351	2.46922e-05	4.55005
BRCT	BRCA1 C Terminus (BRCT) domain	22	19	3.40009e-05	7.48249e-06	4.54406
N6_N4_Mtase	DNA methylase	861	753	0.00127429	0.00028209	4.51734
Bacteriocin_IId	Bacteriocin class IId cyclical uberolysin-like	15	13	2.36528e-05	5.23774e-06	4.51584
Big_2	Bacterial Ig-like domain (group 2)	146	128	0.00021731	4.8262e-05	4.50271
Avidin	Avidin family	24	21	3.69575e-05	8.23074e-06	4.49018
Abi_2	Abi-like protein	134	118	0.00019957	4.45208e-05	4.48263
DUF1045	Protein of unknown function (DUF1045)	50	44	7.53933e-05	1.68356e-05	4.47821
Transposon_TraM	Conjugative transposon, TraM	16	14	2.51311e-05	5.61187e-06	4.47821
DUF5131	Protein of unknown function (DUF5131)	76	67	0.000113829	2.54405e-05	4.47433
Octopine_DH	NAD/NADP octopine/nopaline dehydrogenase, alpha-helical domain	51	45	7.68716e-05	1.72097e-05	4.46675
Transposase_mut	Transposase, Mutator family	1537	1363	0.00227362	0.000510306	4.45542
Colicin_Pyocin	Colicin immunity protein / pyocin immunity protein	62	55	9.31329e-05	2.0951e-05	4.44528
DUF1206	Domain of Unknown Function (DUF1206)	54	48	8.13065e-05	1.83321e-05	4.4352
Guanylate_cyc	Adenylate and Guanylate cyclase catalytic domain	560	499	0.000829326	0.000187062	4.43342
UPF0175	Uncharacterised protein family (UPF0175)	18	16	2.80877e-05	6.36011e-06	4.41622
GIIM	Group II intron, maturase-specific domain	57	51	8.57414e-05	1.94545e-05	4.40728
Phage_integrase	Phage integrase family	5089	4569	0.00752454	0.00170975	4.40097
YscK	YOP proteins translocation protein K (YscK)	48	43	7.24367e-05	1.64615e-05	4.40038
NEL	C-terminal novel E3 ligase, LRR-interacting	110	99	0.000164091	3.74124e-05	4.38601
MerR-DNA-bind	MerR, DNA binding	554	500	0.000820456	0.000187436	4.37725
DUF2971	Protein of unknown function (DUF2971)	53	48	7.98282e-05	1.83321e-05	4.35456
Cas_Cas7	CRISPR-associated protein Cas7	56	51	8.42631e-05	1.94545e-05	4.3313
NodS	Nodulation protein S (NodS)	45	41	6.80018e-05	1.57132e-05	4.32768
DUF746	Domain of Unknown Function (DUF746)	11	10	1.77396e-05	4.11537e-06	4.31057
TetR_C_7	AefR-like transcriptional repressor, C-terminal region	47	43	7.09584e-05	1.64615e-05	4.31057
SSB	Single-strand binding protein family	1239	1144	0.00183309	0.000428372	4.2792
HupE_UreJ_2	HupE / UreJ protein	67	62	0.000100524	2.35698e-05	4.26496
HicB_lk_antitox	HicB_like antitoxin of bacterial toxin-antitoxin system	154	144	0.000229136	5.4248e-05	4.22387
Dimer_Tnp_Tn5	Transposase Tn5 dimerisation domain	46	43	6.94801e-05	1.64615e-05	4.22077
DUF1537	Putative sugar-binding N-terminal domain	305	286	0.00045236	0.000107374	4.21295
PEP_hydrolase	Phosphoenolpyruvate hydrolase-like	80	75	0.000119742	2.84335e-05	4.21132
DUF4142	Domain of unknown function (DUF4142)	202	190	0.000300095	7.14578e-05	4.19961
DUF433	Protein of unknown function (DUF433)	88	83	0.000131569	3.14264e-05	4.18656
NolV	Nodulation protein NolV	35	33	5.32188e-05	1.27202e-05	4.18379
Spherulin4	Spherulation-specific family 4	17	16	2.66094e-05	6.36011e-06	4.18379
Pyridox_oxase_2	Pyridoxamine 5'-phosphate oxidase	19	18	2.9566e-05	7.10836e-06	4.15932
DUF4112	Domain of unknown function (DUF4112)	59	56	8.8698e-05	2.13251e-05	4.15932
DUF1413	Domain of unknown function (DUF1413)	20	19	3.10443e-05	7.48249e-06	4.14893
Fic	Fic/DOC family	569	542	0.000842631	0.000203149	4.14783
Glyco_hydro_28	Glycosyl hydrolases family 28	112	107	0.000167048	4.04054e-05	4.13429
DUF4376	Domain of unknown function (DUF4376)	45	43	6.80018e-05	1.64615e-05	4.13097
Mig-14	Mig-14	48	46	7.24367e-05	1.75838e-05	4.1195
Oxidored_nitro	Nitrogenase component 1 type Oxidoreductase	353	339	0.000523318	0.000127202	4.11406
DUF87	Domain of unknown function DUF87	110	106	0.000164091	4.00313e-05	4.09907
DZR	Double zinc ribbon	29	28	4.4349e-05	1.08496e-05	4.08761
AbiH	Bacteriophage abortive infection AbiH	32	31	4.87839e-05	1.1972e-05	4.07484
NapE	Periplasmic nitrate reductase protein NapE	38	37	5.76537e-05	1.42167e-05	4.05534
DUF1427	Protein of unknown function (DUF1427)	77	75	0.000115307	2.84335e-05	4.05534
LigD_N	DNA polymerase Ligase (LigD)	104	102	0.000155221	3.85348e-05	4.02808
Terminase_6	Terminase-like family	223	219	0.000331139	8.23074e-05	4.0232
DUF2160	Predicted small integral membrane protein (DUF2160)	56	55	8.42631e-05	2.0951e-05	4.02192
DUF1819	Putative inner membrane protein (DUF1819)	31	31	4.73056e-05	1.1972e-05	3.95136
DUF4138	Domain of unknown function (DUF4138)	15	15	2.36528e-05	5.986e-06	3.95136
YafO_toxin	Toxin YafO, type II toxin-antitoxin system	24	24	3.69575e-05	9.35311e-06	3.95136
NTP_transf_5	Uncharacterised nucleotidyltransferase	68	68	0.000102003	2.58146e-05	3.95136
DUF447	Protein of unknown function (DUF447)	12	12	1.92179e-05	4.86362e-06	3.95136
Usg	Usg-like family	26	26	3.99141e-05	1.01014e-05	3.95136
DUF993	Protein of unknown function (DUF993)	32	32	4.87839e-05	1.23461e-05	3.95136
DUF3500	Protein of unknown function (DUF3500)	21	21	3.25226e-05	8.23074e-06	3.95136
DUF2318	Predicted membrane protein (DUF2318)	40	40	6.06103e-05	1.53391e-05	3.95136
DUF2997	Protein of unknown function (DUF2997)	10	10	1.62613e-05	4.11537e-06	3.95136
GST_C_3	Glutathione S-transferase, C-terminal domain	67	67	0.000100524	2.54405e-05	3.95136
GPI	Glucose-6-phosphate isomerase (GPI)	21	21	3.25226e-05	8.23074e-06	3.95136
SLT	Transglycosylase SLT domain	1526	1529	0.00225736	0.00057241	3.94361
HOK_GEF	Hok/gef family	303	306	0.000449403	0.000114856	3.91275
KAP_NTPase	KAP family P-loop domain	92	93	0.000137482	3.51677e-05	3.90932
rve_2	Integrase core domain	200	203	0.000297138	7.63214e-05	3.89325
T3SS_basalb_I	Type III secretion basal body protein I, YscI, HrpB, PscI	52	53	7.83499e-05	2.02027e-05	3.87818
DUF772	Transposase domain (DUF772)	634	646	0.00093872	0.000242059	3.87807
T2SSE	Type II/IV secretion system protein	1817	1855	0.00268755	0.000694375	3.87046
DUF86	Protein of unknown function DUF86	140	143	0.00020844	5.38739e-05	3.86904
DUF1430	Protein of unknown function (DUF1430)	39	40	5.9132e-05	1.53391e-05	3.85498
DUF1810	Protein of unknown function (DUF1810)	59	61	8.8698e-05	2.31957e-05	3.82389
UPF0261	Uncharacterised protein family (UPF0261)	74	77	0.000110872	2.91817e-05	3.79938
NTase_sub_bind	Nucleotidyltransferase substrate binding protein like	45	47	6.80018e-05	1.7958e-05	3.78672
Hydantoinase_A	Hydantoinase/oxoprolinase	203	212	0.000301573	7.96885e-05	3.7844
AbiEi_3	Transcriptional regulator, AbiEi antitoxin, Type IV TA system	42	44	6.35669e-05	1.68356e-05	3.77574
HigB_toxin	HigB_toxin, RelE-like toxic component of a toxin-antitoxin system	103	108	0.000153743	4.07796e-05	3.7701
RuBisCO_small	Ribulose bisphosphate carboxylase, small chain	38	40	5.76537e-05	1.53391e-05	3.75861
Hydantoinase_B	Hydantoinase B/oxoprolinase	234	247	0.0003474	9.27828e-05	3.74423
DUF4172	Domain of unknown function (DUF4172)	51	54	7.68716e-05	2.05768e-05	3.73583
Baculo_PEP_C	Baculovirus polyhedron envelope protein, PEP, C terminus	16	17	2.51311e-05	6.73424e-06	3.73184
Yop-YscD_ppl	Inner membrane component of T3SS, periplasmic domain	49	52	7.3915e-05	1.98286e-05	3.7277
T3SS_needle_E	Type III secretion system, cytoplasmic E component of needle	48	51	7.24367e-05	1.94545e-05	3.7234
RelE	RelE toxin of RelE / RelB toxin-antitoxin system	96	102	0.000143395	3.85348e-05	3.72118
Pro_racemase	Proline racemase	174	185	0.000258702	6.95871e-05	3.71768
NACHT	NACHT domain	30	32	4.58273e-05	1.23461e-05	3.71188
Tn7_Tnp_TnsA_N	TnsA endonuclease N terminal	55	59	8.27848e-05	2.24475e-05	3.68793
DUF1269	Protein of unknown function (DUF1269)	27	29	4.13924e-05	1.12237e-05	3.68793
CRISPR_Cas6	CRISPR-associated endoribonuclease Cas6	26	28	3.99141e-05	1.08496e-05	3.67885
MCH	Cyclohydrolase (MCH)	12	13	1.92179e-05	5.23774e-06	3.66912
Caps_synth_CapC	Capsule biosynthesis CapC	37	40	5.61754e-05	1.53391e-05	3.66223
Peptidase_M10_C	Peptidase M10 serralysin C terminal	58	63	8.72197e-05	2.3944e-05	3.64266
Erythro_esteras	Erythromycin esterase	81	88	0.000121221	3.32971e-05	3.64058
NosD	Periplasmic copper-binding protein (NosD)	69	75	0.000103481	2.84335e-05	3.63941
DDE_3	DDE superfamily endonuclease	1007	1096	0.00149013	0.000410414	3.63078
SEFIR	SEFIR domain	10	11	1.62613e-05	4.48949e-06	3.62208
BNR	BNR/Asp-box repeat	10	11	1.62613e-05	4.48949e-06	3.62208
DUF4262	Domain of unknown function (DUF4262)	21	23	3.25226e-05	8.979e-06	3.62208
DUF669	Protein of unknown function (DUF669)	10	11	1.62613e-05	4.48949e-06	3.62208
Copper-bind	Copper binding proteins, plastocyanin/azurin family	171	187	0.000254267	7.03354e-05	3.61507
DUF3268	zinc-finger-containing domain	20	22	3.10443e-05	8.60486e-06	3.60776
Mrr_cat_2	Restriction endonuclease	29	32	4.4349e-05	1.23461e-05	3.59214
Clostridium_P47	Clostridium P-47 protein	9	10	1.4783e-05	4.11537e-06	3.59214
BA14K	BA14K-like protein	45	50	6.80018e-05	1.90803e-05	3.56397
NnrU	NnrU protein	62	69	9.31329e-05	2.61887e-05	3.55622
Pyocin_S	S-type Pyocin	48	54	7.24367e-05	2.05768e-05	3.5203
Pterin_bind	Pterin binding enzyme	662	744	0.000980112	0.000278723	3.51644
DUF4147	Domain of unknown function (DUF4147)	94	106	0.000140438	4.00313e-05	3.50822
DUF3141	Protein of unknown function (DUF3141)	62	70	9.31329e-05	2.65628e-05	3.50613
DUF2075	Uncharacterized conserved protein (DUF2075)	84	95	0.000125655	3.59159e-05	3.4986
DUF2442	Protein of unknown function (DUF2442)	68	77	0.000102003	2.91817e-05	3.49543
DUF2182	Predicted metal-binding integral membrane protein (DUF2182)	45	51	6.80018e-05	1.94545e-05	3.49543
DUF4011	Protein of unknown function (DUF4011)	37	42	5.61754e-05	1.60873e-05	3.4919
DNA_methylase	C-5 cytosine-specific DNA methylase	559	633	0.000827848	0.000237195	3.49016
Peripla_BP_4	Periplasmic binding protein domain	1730	1962	0.00255894	0.000734406	3.48436
SPW	SPW repeat	43	49	6.50452e-05	1.87062e-05	3.4772
DUF3293	Protein of unknown function (DUF3293)	21	24	3.25226e-05	9.35311e-06	3.4772
CopC	CopC domain	257	293	0.000381401	0.000109993	3.46752
ExoD	Exopolysaccharide synthesis, ExoD	55	63	8.27848e-05	2.3944e-05	3.45744
DUF1788	Domain of unknown function (DUF1788)	27	31	4.13924e-05	1.1972e-05	3.45744
Phenol_Hydrox	Methane/Phenol/Toluene Hydroxylase	33	38	5.02622e-05	1.45909e-05	3.44477
Topoisom_I	Eukaryotic DNA topoisomerase I, catalytic core	73	84	0.000109394	3.18006e-05	3.44001
DUF2254	Predicted membrane protein (DUF2254)	97	112	0.000144873	4.22761e-05	3.42684
Methyltransf_14	C-methyltransferase C-terminal domain	44	51	6.65235e-05	1.94545e-05	3.41944
Adenyl_transf	Streptomycin adenylyltransferase	63	73	9.46112e-05	2.76852e-05	3.41739
DUF4396	Domain of unknown function (DUF4396)	24	28	3.69575e-05	1.08496e-05	3.40634
PAS	PAS fold	215	250	0.000319313	9.39052e-05	3.40037
Iron_permease	Low affinity iron permease	54	63	8.13065e-05	2.3944e-05	3.3957
DUF1205	Protein of unknown function (DUF1205)	41	48	6.20886e-05	1.83321e-05	3.38688
RVT_N	N-terminal domain of reverse transcriptase	11	13	1.77396e-05	5.23774e-06	3.38688
DUF4291	Domain of unknown function (DUF4291)	11	13	1.77396e-05	5.23774e-06	3.38688
DUF2274	Protein of unknown function (DUF2274)	28	33	4.28707e-05	1.27202e-05	3.37028
Topoisom_bac	DNA topoisomerase	911	1069	0.00134821	0.000400313	3.36789
Lsr2	Lsr2	62	73	9.31329e-05	2.76852e-05	3.36399
SHOCT	Short C-terminal domain	33	39	5.02622e-05	1.4965e-05	3.35865
DEDD_Tnp_IS110	Transposase	773	911	0.0011442	0.000341201	3.35346
DUF4062	Domain of unknown function (DUF4062)	27	32	4.13924e-05	1.23461e-05	3.35267
HMA	Heavy-metal-associated domain	491	579	0.000727323	0.000216992	3.35184
DUF4360	Domain of unknown function (DUF4360)	10	12	1.62613e-05	4.86362e-06	3.34346
DUF4879	Domain of unknown function (DUF4879)	21	25	3.25226e-05	9.72723e-06	3.34346
DUF3604	Protein of unknown function (DUF3604)	31	37	4.73056e-05	1.42167e-05	3.32746
DUF4357	Domain of unknown function (DUF4357)	15	18	2.36528e-05	7.10836e-06	3.32746
AAA_22	AAA domain	280	335	0.000415402	0.000125706	3.30456
DUF4192	Domain of unknown function (DUF4192)	50	60	7.53933e-05	2.28216e-05	3.30359
F420_oxidored	NADP oxidoreductase coenzyme F420-dependent	177	212	0.000263137	7.96885e-05	3.30207
FrhB_FdhB_C	Coenzyme F420 hydrogenase/dehydrogenase, beta subunit C terminus	29	35	4.4349e-05	1.34685e-05	3.2928
DUF4041	Domain of unknown function (DUF4041)	14	17	2.21745e-05	6.73424e-06	3.2928
4HFCP_synth	4-HFC-P synthase	14	17	2.21745e-05	6.73424e-06	3.2928
DUF3105	Protein of unknown function (DUF3105)	19	23	2.9566e-05	8.979e-06	3.2928
Toxin_YhaV	Toxin with endonuclease activity, of toxin-antitoxin system	42	51	6.35669e-05	1.94545e-05	3.26747
DUF1485	Metallopeptidase family M81	136	165	0.000202527	6.21046e-05	3.26106
DUF3008	Protein of unknwon function (DUF3008)	41	50	6.20886e-05	1.90803e-05	3.25406
FIVAR	FIVAR domain	27	33	4.13924e-05	1.27202e-05	3.25406
DUF4134	Domain of unknown function (DUF4134)	13	16	2.06962e-05	6.36011e-06	3.25406
D-ser_dehydrat	Putative serine dehydratase domain	64	78	9.60895e-05	2.95558e-05	3.25112
Rep_trans	Replication initiation factor	105	128	0.0001567	4.8262e-05	3.24685
NIPSNAP	NIPSNAP	122	149	0.000181831	5.61187e-05	3.24011
HTH_33	Winged helix-turn helix	138	169	0.000205484	6.36011e-05	3.23082
Lon_2	Putative ATP-dependent Lon protease	30	37	4.58273e-05	1.42167e-05	3.22348
DUF2325	Uncharacterized protein conserved in bacteria (DUF2325)	82	101	0.000122699	3.81607e-05	3.21532
DUF4258	Domain of unknown function (DUF4258)	12	15	1.92179e-05	5.986e-06	3.21048
Bacteriocin_IIc	Bacteriocin class II with double-glycine leader peptide	25	31	3.84358e-05	1.1972e-05	3.21048
OCD_Mu_crystall	Ornithine cyclodeaminase/mu-crystallin family	324	400	0.000480447	0.000150024	3.20247
PGDYG	PGDYG protein	16	20	2.51311e-05	7.85661e-06	3.19872
AtpR	N-ATPase, AtpR subunit	16	20	2.51311e-05	7.85661e-06	3.19872
K_oxygenase	L-lysine 6-monooxygenase (NADPH-requiring)	190	235	0.000282355	8.82933e-05	3.19792
AAA_16	AAA ATPase domain	177	219	0.000263137	8.23074e-05	3.19701
DUF899	Bacterial protein of unknown function (DUF899)	97	121	0.000144873	4.56432e-05	3.17404
ThuA	Trehalose utilisation	108	135	0.000161135	5.08809e-05	3.1669
FixQ	Cbb3-type cytochrome oxidase component FixQ	107	134	0.000159656	5.05068e-05	3.16109
Antigen_C	Cell surface antigen C-terminus	15	19	2.36528e-05	7.48249e-06	3.16109
DUF1156	Protein of unknown function (DUF1156)	23	29	3.54792e-05	1.12237e-05	3.16109
DUF3703	Protein of unknown function (DUF3703)	11	14	1.77396e-05	5.61187e-06	3.16109
HTH_5	Bacterial regulatory protein, arsR family	982	1234	0.00145317	0.000462044	3.14509
BrnT_toxin	Ribonuclease toxin, BrnT, of type II toxin-antitoxin system	100	126	0.000149308	4.75138e-05	3.14242
Cytochrome_P460	Cytochrome P460	26	33	3.99141e-05	1.27202e-05	3.13784
SRAP	SOS response associated peptidase (SRAP)	329	415	0.000487839	0.000155636	3.13449
TadE	TadE-like protein	152	192	0.00022618	7.2206e-05	3.13242
ArsB	Arsenical pump membrane protein	231	292	0.000342965	0.000109618	3.12872
ATC_hydrolase	L-2-amino-thiazoline-4-carboxylic acid hydrolase	29	37	4.4349e-05	1.42167e-05	3.11949
Lar_restr_allev	Restriction alleviation protein Lar	14	18	2.21745e-05	7.10836e-06	3.11949
DUF4007	Protein of unknown function (DUF4007)	14	18	2.21745e-05	7.10836e-06	3.11949
DUF4752	Domain of unknown function (DUF4752)	10	13	1.62613e-05	5.23774e-06	3.10464
CpeS	CpeS-like protein	10	13	1.62613e-05	5.23774e-06	3.10464
DUF4010	Domain of unknown function (DUF4010)	46	59	6.94801e-05	2.24475e-05	3.09523
SoxY	Sulfur oxidation protein SoxY	46	59	6.94801e-05	2.24475e-05	3.09523
Tnp_DNA_bind	Transposase DNA-binding	46	59	6.94801e-05	2.24475e-05	3.09523
Sulfotransfer_3	Sulfotransferase family	172	220	0.000255746	8.26815e-05	3.09314
LigA	Aromatic-ring-opening dioxygenase LigAB, LigA subunit	17	22	2.66094e-05	8.60486e-06	3.09237
MTTB	Trimethylamine methyltransferase (MTTB)	49	63	7.3915e-05	2.3944e-05	3.087
rve_3	Integrase core domain	962	1233	0.0014236	0.00046167	3.0836
DUF1541	Protein of unknown function (DUF1541)	27	35	4.13924e-05	1.34685e-05	3.07328
DUF2840	Protein of unknown function (DUF2840)	27	35	4.13924e-05	1.34685e-05	3.07328
DDE_Tnp_ISL3	Transposase	840	1089	0.00124325	0.000407796	3.04871
Phage_min_tail	Phage minor tail protein	113	147	0.000168526	5.53704e-05	3.04361
DUF4410	Domain of unknown function (DUF4410)	9	12	1.4783e-05	4.86362e-06	3.03951
DUF2277	Uncharacterized conserved protein (DUF2277)	32	42	4.87839e-05	1.60873e-05	3.03244
FmdA_AmdA	Acetamidase/Formamidase family	126	165	0.000187744	6.21046e-05	3.02303
DUF2478	Protein of unknown function (DUF2478)	12	16	1.92179e-05	6.36011e-06	3.02163
CO_deh_flav_C	CO dehydrogenase flavoprotein C-terminal domain	15	20	2.36528e-05	7.85661e-06	3.01056
HTH_19	Helix-turn-helix domain	172	227	0.000255746	8.53004e-05	2.99818
DUF4031	Protein of unknown function (DUF4031)	21	28	3.25226e-05	1.08496e-05	2.99758
ATPase_2	ATPase domain predominantly from Archaea	21	28	3.25226e-05	1.08496e-05	2.99758
AbiEi_2	Transcriptional regulator, AbiEi antitoxin, Type IV TA system	21	28	3.25226e-05	1.08496e-05	2.99758
DUF347	Repeat of Unknown Function (DUF347)	71	94	0.000106438	3.55418e-05	2.99471
DUF2958	Protein of unknown function (DUF2958)	24	32	3.69575e-05	1.23461e-05	2.99345
DUF2961	Protein of unknown function (DUF2961)	24	32	3.69575e-05	1.23461e-05	2.99345
DUF2786	Protein of unknown function (DUF2786)	61	81	9.16546e-05	3.06782e-05	2.98761
Potass_KdpF	F subunit of K+-transporting ATPase (Potass_KdpF)	51	68	7.68716e-05	2.58146e-05	2.97784
Prim-Pol	Bifunctional DNA primase/polymerase, N-terminal	57	76	8.57414e-05	2.88076e-05	2.97635
YoeB_toxin	YoeB-like toxin of bacterial type II toxin-antitoxin system	108	144	0.000161135	5.4248e-05	2.97033
DUF957	Enterobacterial protein of unknown function (DUF957)	41	55	6.20886e-05	2.0951e-05	2.96352
DUF4225	Protein of unknown function (DUF4225)	23	31	3.54792e-05	1.1972e-05	2.96352
DUF5412	Family of unknown function (DUF5412)	11	15	1.77396e-05	5.986e-06	2.96352
DUF1837	Domain of unknown function (DUF1837)	20	27	3.10443e-05	1.04755e-05	2.96352
EthD	EthD domain	35	47	5.32188e-05	1.7958e-05	2.96352
Cas_TM1802	CRISPR-associated protein TM1802 (cas_TM1802)	8	11	1.33047e-05	4.48949e-06	2.96352
HpaP	Type III secretion protein (HpaP)	17	23	2.66094e-05	8.979e-06	2.96352
AAA_15	AAA ATPase domain	286	385	0.000424272	0.000144412	2.93793
Cu-oxidase_3	Multicopper oxidase	435	588	0.000644539	0.000220359	2.92494
Dioxygenase_C	Dioxygenase	303	410	0.000449403	0.000153765	2.92266
ABC_membrane_3	ABC transporter transmembrane region	16	22	2.51311e-05	8.60486e-06	2.92057
DUF262	Protein of unknown function DUF262	225	305	0.000334096	0.000114482	2.91832
Phage_fiber_2	Phage tail fibre repeat	47	64	7.09584e-05	2.43181e-05	2.91793
D5_N	D5 N terminal like	47	64	7.09584e-05	2.43181e-05	2.91793
HupE_UreJ	HupE / UreJ protein	80	109	0.000119742	4.11537e-05	2.90964
DUF3348	Protein of unknown function (DUF3348)	24	33	3.69575e-05	1.27202e-05	2.90541
Glyco_hydro_39	Glycosyl hydrolases family 39	24	33	3.69575e-05	1.27202e-05	2.90541
DUF2894	Protein of unknown function (DUF2894)	24	33	3.69575e-05	1.27202e-05	2.90541
Transposase_31	Putative transposase, YhgA-like	381	519	0.00056471	0.000194545	2.90273
AAA_35	AAA-like domain	18	25	2.80877e-05	9.72723e-06	2.88753
RcpC	Flp pilus assembly protein RcpC/CpaB	152	209	0.00022618	7.85661e-05	2.87885
VapB_antitoxin	Bacterial antitoxin of type II TA system, VapB	66	91	9.90461e-05	3.44194e-05	2.87762
CmcI	Cephalosporin hydroxylase	23	32	3.54792e-05	1.23461e-05	2.87371
VWA	von Willebrand factor type A domain	270	372	0.000400619	0.000139548	2.87083
DUF3830	Protein of unknown function (DUF3830)	12	17	1.92179e-05	6.73424e-06	2.85376
DUF3489	Protein of unknown function (DUF3489)	12	17	1.92179e-05	6.73424e-06	2.85376
FCD	FCD domain	2214	3066	0.00327443	0.00114744	2.85369
Mga	Mga helix-turn-helix domain	112	156	0.000167048	5.87375e-05	2.84397
LHH	A nuclease of the HNH/ENDO VII superfamily with conserved LHH	9	13	1.4783e-05	5.23774e-06	2.8224
Phage_pRha	Phage regulatory protein Rha (Phage_pRha)	74	104	0.000110872	3.92831e-05	2.8224
DUF4268	Domain of unknown function (DUF4268)	21	30	3.25226e-05	1.15979e-05	2.80419
Peptidase_S78_2	Putative phage serine protease XkdF	16	23	2.51311e-05	8.979e-06	2.79888
DUF3618	Protein of unknown function (DUF3618)	45	64	6.80018e-05	2.43181e-05	2.79635
RraA-like	Aldolase/RraA	364	515	0.000539579	0.000193048	2.79505
EF-hand_1	EF hand	40	57	6.06103e-05	2.16992e-05	2.7932
YtkA	YtkA-like	42	60	6.35669e-05	2.28216e-05	2.78538
DUF3672	Fibronectin type III protein	30	43	4.58273e-05	1.64615e-05	2.78391
FlhC	Flagellar transcriptional activator (FlhC)	111	158	0.000165569	5.94858e-05	2.78335
SBP_bac_1	Bacterial extracellular solute-binding protein	808	1151	0.00119594	0.000430991	2.77487
Glyco_hydro_16	Glycosyl hydrolases family 16	114	163	0.000170004	6.13564e-05	2.77077
HCBP_related	Haemolysin-type calcium binding protein related domain	13	19	2.06962e-05	7.48249e-06	2.76595
DUF2285	Uncharacterized conserved protein (DUF2285)	27	39	4.13924e-05	1.4965e-05	2.76595
BKACE	beta-keto acid cleavage enzyme	176	252	0.000261659	9.46535e-05	2.76439
SnoaL	SnoaL-like polyketide cyclase	148	212	0.000220267	7.96885e-05	2.7641
TPR_3	Tetratricopeptide repeat	59	85	8.8698e-05	3.21747e-05	2.75676
NosL	NosL	54	78	8.13065e-05	2.95558e-05	2.75095
DUF3850	Domain of Unknown Function with PDB structure (DUF3850)	15	22	2.36528e-05	8.60486e-06	2.74877
NHase_beta	Nitrile hydratase beta subunit	33	48	5.02622e-05	1.83321e-05	2.74176
HTH_17	Helix-turn-helix domain	363	524	0.000538101	0.000196415	2.73961
IucA_IucC	IucA / IucC family	227	328	0.000337052	0.000123087	2.73833
Hint_2	Hint domain	89	129	0.000133047	4.86362e-05	2.73556
XisI	XisI protein	8	12	1.33047e-05	4.86362e-06	2.73556
PTH2	Peptidyl-tRNA hydrolase PTH2	8	12	1.33047e-05	4.86362e-06	2.73556
DUF3072	Protein of unknown function (DUF3072)	8	12	1.33047e-05	4.86362e-06	2.73556
HrpB2	Bacterial type III secretion protein (HrpB2)	17	25	2.66094e-05	9.72723e-06	2.73556
Cu-oxidase_2	Multicopper oxidase	137	199	0.000204005	7.48249e-05	2.72644
UPF0262	Uncharacterised protein family (UPF0262)	19	28	2.9566e-05	1.08496e-05	2.72507
Peptidase_C1	Papain family cysteine protease	21	31	3.25226e-05	1.1972e-05	2.71656
DUF3616	Protein of unknown function (DUF3616)	10	15	1.62613e-05	5.986e-06	2.71656
Peptidase_M60	Peptidase M60, enhancin and enhancin-like	21	31	3.25226e-05	1.1972e-05	2.71656
DUF2513	Hypothetical protein (DUF2513)	23	34	3.54792e-05	1.30944e-05	2.7095
NAD_binding_9	FAD-NAD(P)-binding	166	243	0.000246876	9.12863e-05	2.70441
DUF3892	Protein of unknown function (DUF3892)	25	37	3.84358e-05	1.42167e-05	2.70356
Autoind_bind	Autoinducer binding domain	259	379	0.000384358	0.000142167	2.70356
DUF4160	Domain of unknown function (DUF4160)	40	59	6.06103e-05	2.24475e-05	2.70009
DUF2398	Protein of unknown function (DUF2398)	14	21	2.21745e-05	8.23074e-06	2.69411
Amidoligase_2	Putative amidoligase enzyme	16	24	2.51311e-05	9.35311e-06	2.68692
DUF1349	Protein of unknown function (DUF1349)	67	99	0.000100524	3.74124e-05	2.68692
Mucin_bdg	Putative mucin or carbohydrate-binding module	37	55	5.61754e-05	2.0951e-05	2.68128
Phage_tail_L	Phage minor tail protein L	113	167	0.000168526	6.28529e-05	2.68128
Phage_CRI	Phage replication protein CRI	20	30	3.10443e-05	1.15979e-05	2.67673
CopD	Copper resistance protein D	192	284	0.000285312	0.000106625	2.67583
DUF802	Domain of unknown function (DUF802)	24	36	3.69575e-05	1.38426e-05	2.66984
DUF1989	Domain of unknown function (DUF1989)	113	168	0.000168526	6.3227e-05	2.66541
Glyco_transf_36	Glycosyltransferase family 36	32	48	4.87839e-05	1.83321e-05	2.66112
TrmB	Sugar-specific transcriptional regulator TrmB	60	90	9.01763e-05	3.40453e-05	2.64871
SnoaL_4	SnoaL-like domain	187	280	0.00027792	0.000105129	2.64361
HipA_C	HipA-like C-terminal domain	263	394	0.000390271	0.000147779	2.64091
Thioredoxin_4	Thioredoxin	276	414	0.000409489	0.000155262	2.63741
DUF4157	Domain of unknown function (DUF4157)	25	38	3.84358e-05	1.45909e-05	2.63424
MmoB_DmpM	MmoB/DmpM family	11	17	1.77396e-05	6.73424e-06	2.63424
Minor_capsid_2	Minor capsid protein	7	11	1.18264e-05	4.48949e-06	2.63424
Peptidase_M78	IrrE N-terminal-like domain	195	293	0.000289747	0.000109993	2.63424
DUF1257	Protein of unknown function (DUF1257)	9	14	1.4783e-05	5.61187e-06	2.63424
DUF3445	Protein of unknown function (DUF3445)	17	26	2.66094e-05	1.01014e-05	2.63424
Phage_Gp15	Bacteriophage Gp15 protein	7	11	1.18264e-05	4.48949e-06	2.63424
RnlB_antitoxin	Antitoxin to bacterial toxin RNase LS or RnlA	7	11	1.18264e-05	4.48949e-06	2.63424
Stap_Strp_tox_C	Staphylococcal/Streptococcal toxin, beta-grasp domain	43	65	6.50452e-05	2.46922e-05	2.63424
DUF3726	Protein of unknown function (DUF3726)	7	11	1.18264e-05	4.48949e-06	2.63424
CbiA	CobQ/CobB/MinD/ParA nucleotide binding domain	292	440	0.000433142	0.000164989	2.62528
N6_Mtase	N-6 DNA Methylase	589	889	0.000872197	0.000332971	2.61944
Peptidase_M56	BlaR1 peptidase M56	118	179	0.000175918	6.73424e-05	2.61229
ANT	Phage antirepressor protein KilAC domain	69	105	0.000103481	3.96572e-05	2.60939
Cupin_7	ChrR Cupin-like domain	99	151	0.00014783	5.68669e-05	2.59958
TctB	Tripartite tricarboxylate transporter TctB family	197	300	0.000292703	0.000112611	2.59923
Dam	DNA N-6-adenine-methyltransferase (Dam)	47	72	7.09584e-05	2.73111e-05	2.59815
FRG	FRG domain	37	57	5.61754e-05	2.16992e-05	2.58882
HTH_20	Helix-turn-helix domain	728	1112	0.00107768	0.0004164	2.58809
LssY_C	LssY C-terminus	16	25	2.51311e-05	9.72723e-06	2.58358
Glyco_hydro_4C	Family 4 glycosyl hydrolase C-terminal domain	82	126	0.000122699	4.75138e-05	2.58238
DUF2000	Protein of unknown function (DUF2000)	31	48	4.73056e-05	1.83321e-05	2.58048
DUF2094	Uncharacterized protein conserved in bacteria (DUF2094)	63	97	9.46112e-05	3.66642e-05	2.58048
DUF2397	Protein of unknown function (DUF2397)	14	22	2.21745e-05	8.60486e-06	2.57697
Phage_min_cap2	Phage minor capsid protein 2	14	22	2.21745e-05	8.60486e-06	2.57697
GMC_oxred_C	GMC oxidoreductase	278	427	0.000412446	0.000160125	2.57577
XhlA	Haemolysin XhlA	42	65	6.35669e-05	2.46922e-05	2.57437
Mpt_N	Methylene-tetrahydromethanopterin dehydrogenase, N-terminal	12	19	1.92179e-05	7.48249e-06	2.56838
DUF2280	Uncharacterized conserved protein (DUF2280)	23	36	3.54792e-05	1.38426e-05	2.56304
YqaJ	YqaJ-like viral recombinase domain	98	152	0.000146352	5.7241e-05	2.55676
DUF3717	Protein of unknown function (DUF3717)	43	67	6.50452e-05	2.54405e-05	2.55676
EndoU_bacteria	Bacterial EndoU nuclease	21	33	3.25226e-05	1.27202e-05	2.55676
Fer2_2	[2Fe-2S] binding domain	409	633	0.000606103	0.000237195	2.55529
DUF326	Domain of Unknown Function (DUF326)	48	75	7.24367e-05	2.84335e-05	2.54759
AAA_18	AAA domain	57	89	8.57414e-05	3.36712e-05	2.54643
MCD	Malonyl-CoA decarboxylase C-terminal domain	37	58	5.61754e-05	2.20733e-05	2.54494
DUF1636	Protein of unknown function (DUF1636)	17	27	2.66094e-05	1.04755e-05	2.54016
HrpB4	Bacterial type III secretion protein (HrpB4)	17	27	2.66094e-05	1.04755e-05	2.54016
HrpB7	Bacterial type III secretion protein (HrpB7)	17	27	2.66094e-05	1.04755e-05	2.54016
EcoR124_C	Type I restriction and modification enzyme - subunit R C terminal	69	108	0.000103481	4.07796e-05	2.53757
BrnA_antitoxin	BrnA antitoxin of type II toxin-antitoxin system	79	124	0.000118264	4.67655e-05	2.52887
PS_pyruv_trans	Polysaccharide pyruvyl transferase	184	289	0.000273485	0.000108496	2.52069
DUF4145	Domain of unknown function (DUF4145)	20	32	3.10443e-05	1.23461e-05	2.5145
Cas_Csd1	CRISPR-associated protein (Cas_Csd1)	25	40	3.84358e-05	1.53391e-05	2.50574
Phage_terminase	Phage terminase small subunit	11	18	1.77396e-05	7.10836e-06	2.49559
Fae	Formaldehyde-activating enzyme (Fae)	23	37	3.54792e-05	1.42167e-05	2.49559
DHFR_1	Dihydrofolate reductase	356	565	0.000527753	0.000211754	2.49229
DUF4257	Protein of unknown function (DUF4257)	16	26	2.51311e-05	1.01014e-05	2.48789
Gram_pos_anchor	LPXTG cell wall anchor motif	33	53	5.02622e-05	2.02027e-05	2.48789
HHH_4	Helix-hairpin-helix containing domain	16	26	2.51311e-05	1.01014e-05	2.48789
APH	Phosphotransferase enzyme family	1120	1783	0.00165717	0.000667438	2.48289
PhoPQ_related	PhoPQ-activated pathogenicity-related protein	31	50	4.73056e-05	1.90803e-05	2.47928
NPCBM_assoc	NPCBM-associated, NEW3 domain of alpha-galactosidase	9	15	1.4783e-05	5.986e-06	2.4696
Sulfotransfer_2	Sulfotransferase family	42	68	6.35669e-05	2.58146e-05	2.46244
Peripla_BP_5	Periplasmic binding protein domain	127	205	0.000189222	7.70696e-05	2.45521
TctA	Tripartite tricarboxylate transporter TctA family	222	358	0.000329661	0.000134311	2.45446
FixO	Cytochrome C oxidase, mono-heme subunit/FixO	138	223	0.000205484	8.38039e-05	2.45196
T2SS-T3SS_pil_N	Pilus formation protein N terminal region	20	33	3.10443e-05	1.27202e-05	2.44054
RAMPs	RAMP superfamily	65	106	9.75678e-05	4.00313e-05	2.43729
AlbA_2	Putative DNA-binding domain	73	119	0.000109394	4.48949e-05	2.43667
Caa3_CtaG	Cytochrome c oxidase caa3 assembly factor (Caa3_CtaG)	134	218	0.00019957	8.19332e-05	2.43577
HTH_36	Helix-turn-helix domain	68	111	0.000102003	4.19019e-05	2.43432
HisKA_7TM	N-terminal 7TM region of histidine kinase	15	25	2.36528e-05	9.72723e-06	2.4316
DUF3485	Protein of unknown function (DUF3485)	7	12	1.18264e-05	4.86362e-06	2.4316
BPL_LplA_LipB_2	Biotin/lipoate A/B protein ligase family	7	12	1.18264e-05	4.86362e-06	2.4316
GDE_N_bis	N-terminal domain of (some) glycogen debranching enzymes	47	77	7.09584e-05	2.91817e-05	2.4316
T5orf172	T5orf172 domain	40	66	6.06103e-05	2.50663e-05	2.418
WxL	WxL domain surface cell wall-binding	84	138	0.000125655	5.20033e-05	2.4163
GXGXG	GXGXG motif	60	99	9.01763e-05	3.74124e-05	2.41033
SGL	SMP-30/Gluconolaconase/LRE-like region	386	634	0.000572102	0.000237569	2.40815
DUF4433	Domain of unknown function (DUF4433)	27	45	4.13924e-05	1.72097e-05	2.40517
Lipoprotein_22	Uncharacterised lipoprotein family	16	27	2.51311e-05	1.04755e-05	2.39904
DUF1093	Protein of unknown function (DUF1093)	90	149	0.000134525	5.61187e-05	2.39716
DUF3006	Protein of unknown function (DUF3006)	22	37	3.40009e-05	1.42167e-05	2.39161
DoxX_3	DoxX-like family	31	52	4.73056e-05	1.98286e-05	2.38573
HTH_3	Helix-turn-helix	2237	3706	0.00330843	0.00138688	2.38552
Ferritin_2	Ferritin-like domain	40	67	6.06103e-05	2.54405e-05	2.38244
Carbam_trans_C	Carbamoyltransferase C-terminus	52	87	7.83499e-05	3.29229e-05	2.3798
Pyridox_ox_2	Pyridoxamine 5'-phosphate oxidase	120	200	0.000178874	7.5199e-05	2.37868
SUKH_6	SMI1-KNR4 cell-wall	76	127	0.000113829	4.78879e-05	2.37699
HTH_Crp_2	Crp-like helix-turn-helix domain	459	764	0.000680018	0.000286205	2.37598
DUF1796	Putative papain-like cysteine peptidase (DUF1796)	17	29	2.66094e-05	1.12237e-05	2.37081
DUF2089	Protein of unknown function (DUF2089)	23	39	3.54792e-05	1.4965e-05	2.37081
Host_attach	Protein required for attachment to host cells	35	59	5.32188e-05	2.24475e-05	2.37081
Transglut_core3	Transglutaminase-like superfamily	29	49	4.4349e-05	1.87062e-05	2.37081
DUF2293	Uncharacterized conserved protein (DUF2293)	14	24	2.21745e-05	9.35311e-06	2.37081
Inhibitor_I36	Peptidase inhibitor family I36	8	14	1.33047e-05	5.61187e-06	2.37081
Fer4_15	4Fe-4S single cluster domain	67	113	0.000100524	4.26502e-05	2.35695
SoxD	Sarcosine oxidase, delta subunit family	65	110	9.75678e-05	4.15278e-05	2.34946
DUF1016	Protein of unknown function (DUF1016)	100	169	0.000149308	6.36011e-05	2.34757
PepSY_2	Peptidase propeptide and YPEB domain	56	95	8.42631e-05	3.59159e-05	2.34612
PBS_linker_poly	Phycobilisome Linker polypeptide	15	26	2.36528e-05	1.01014e-05	2.34155
SprT-like	SprT-like family	156	264	0.000232093	9.9143e-05	2.34099
DUF2169	Uncharacterized protein conserved in bacteria (DUF2169)	44	75	6.65235e-05	2.84335e-05	2.33962
CbtA	Probable cobalt transporter subunit (CbtA)	38	65	5.76537e-05	2.46922e-05	2.33489
DUF2267	Uncharacterized conserved protein (DUF2267)	25	43	3.84358e-05	1.64615e-05	2.33489
DUF1476	Domain of unknown function (DUF1476)	19	33	2.9566e-05	1.27202e-05	2.32433
NPCBM	NPCBM/NEW2 domain	9	16	1.4783e-05	6.36011e-06	2.32433
AdoMet_Synthase	S-adenosylmethionine synthetase (AdoMet synthetase)	9	16	1.4783e-05	6.36011e-06	2.32433
DUF928	Domain of Unknown Function (DUF928)	9	16	1.4783e-05	6.36011e-06	2.32433
NnrS	NnrS protein	86	147	0.000128612	5.53704e-05	2.32276
Nitro_FeMo-Co	Dinitrogenase iron-molybdenum cofactor	66	113	9.90461e-05	4.26502e-05	2.32229
Peptidase_S24	Peptidase S24-like	834	1422	0.00123438	0.000532379	2.31861
DUF2322	Uncharacterized protein conserved in bacteria (DUF2322)	23	40	3.54792e-05	1.53391e-05	2.31299
TIR_2	TIR domain	75	129	0.000112351	4.86362e-05	2.31002
TnsD	Tn7-like transposition protein D	20	35	3.10443e-05	1.34685e-05	2.30496
DUF4304	Domain of unknown function (DUF4304)	6	11	1.03481e-05	4.48949e-06	2.30496
MvaI_BcnI	MvaI/BcnI restriction endonuclease family	6	11	1.03481e-05	4.48949e-06	2.30496
GFA	Glutathione-dependent formaldehyde-activating enzyme	299	514	0.00044349	0.000192674	2.30176
Lambda_Bor	Bor protein	31	54	4.73056e-05	2.05768e-05	2.29897
DUF3861	Domain of Unknown Function with PDB structure (DUF3861)	17	30	2.66094e-05	1.15979e-05	2.29434
Alpha_L_fucos	Alpha-L-fucosidase	82	142	0.000122699	5.34998e-05	2.29345
Cupin_2	Cupin domain	1002	1728	0.00148273	0.000646861	2.2922
Peptidase_Mx	Putative zinc-binding metallo-peptidase	28	49	4.28707e-05	1.87062e-05	2.29179
DUF1775	Domain of unkown function (DUF1775)	50	87	7.53933e-05	3.29229e-05	2.28999
Cupin_6	Cupin	178	308	0.000264616	0.000115604	2.28897
HNH_4	HNH endonuclease	25	44	3.84358e-05	1.68356e-05	2.28301
DUF2793	Protein of unknown function (DUF2793)	14	25	2.21745e-05	9.72723e-06	2.27963
FCSD-flav_bind	Flavocytochrome c sulphide dehydrogenase, flavin-binding	14	25	2.21745e-05	9.72723e-06	2.27963
PqqA	PqqA family	14	25	2.21745e-05	9.72723e-06	2.27963
Acyl-CoA_dh_2	Acyl-CoA dehydrogenase, C-terminal domain	289	502	0.000428707	0.000188185	2.27812
DUF1524	Protein of unknown function (DUF1524)	67	117	0.000100524	4.41467e-05	2.27705
AAA_27	AAA domain	52	91	7.83499e-05	3.44194e-05	2.27633
Polysacc_synt_3	Polysaccharide biosynthesis protein	193	336	0.00028679	0.00012608	2.27467
ImcF-related_N	ImcF-related N-terminal domain	99	173	0.00014783	6.50976e-05	2.2709
NfrA_C	Bacteriophage N adsorption protein A C-term	26	46	3.99141e-05	1.75838e-05	2.26993
HrpJ	HrpJ-like domain	63	111	9.46112e-05	4.19019e-05	2.25792
DUF4279	Domain of unknown function (DUF4279)	11	20	1.77396e-05	7.85661e-06	2.25792
Cas_Cmr5	CRISPR-associated protein (Cas_Cmr5)	7	13	1.18264e-05	5.23774e-06	2.25792
BPD_transp_2	Branched-chain amino acid transport system / permease component	3306	5804	0.00488874	0.00217179	2.25101
FixH	FixH	73	129	0.000109394	4.86362e-05	2.24923
Pyrid_ox_like	Pyridoxamine 5'-phosphate oxidase like	66	117	9.90461e-05	4.41467e-05	2.24357
AP_endonuc_2	Xylose isomerase-like TIM barrel	1254	2213	0.00185527	0.000828311	2.23982
DUF1839	Domain of unknown function (DUF1839)	16	29	2.51311e-05	1.12237e-05	2.2391
AIPR	AIPR protein	29	52	4.4349e-05	1.98286e-05	2.23662
DUF1705	Domain of unknown function (DUF1705)	34	61	5.17405e-05	2.31957e-05	2.23061
FAD_binding_5	FAD binding domain in molybdopterin dehydrogenase	290	516	0.000430185	0.000193422	2.22407
SdpA	Sporulation delaying protein SdpA	8	15	1.33047e-05	5.986e-06	2.22264
RE_AlwI	AlwI restriction endonuclease	8	15	1.33047e-05	5.986e-06	2.22264
DUF1629	Protein of unknown function (DUF1629)	8	15	1.33047e-05	5.986e-06	2.22264
DUF551	Protein of unknown function (DUF551)	26	47	3.99141e-05	1.7958e-05	2.22264
MRJP	Major royal jelly protein	31	56	4.73056e-05	2.13251e-05	2.21831
SBP56	56kDa selenium binding protein (SBP56)	13	24	2.06962e-05	9.35311e-06	2.21276
AfsA	A-factor biosynthesis hotdog domain	13	24	2.06962e-05	9.35311e-06	2.21276
FixS	Cytochrome oxidase maturation protein cbb3-type	96	173	0.000143395	6.50976e-05	2.20277
CDPS	Cyclodipeptide synthase	9	17	1.4783e-05	6.73424e-06	2.1952
DUF3331	Domain of unknown function (DUF3331)	24	44	3.69575e-05	1.68356e-05	2.1952
DUF3584	Protein of unknown function (DUF3584)	9	17	1.4783e-05	6.73424e-06	2.1952
DUF2247	Uncharacterized protein conserved in bacteria (DUF2247)	9	17	1.4783e-05	6.73424e-06	2.1952
AHH	A nuclease family of the HNH/ENDO VII superfamily with conserved AHH	14	26	2.21745e-05	1.01014e-05	2.1952
AAA_11	AAA domain	51	93	7.68716e-05	3.51677e-05	2.18586
YmgB	Biofilm development protein YmgB/AriR	46	84	6.94801e-05	3.18006e-05	2.18487
AAA-ATPase_like	Predicted AAA-ATPase	31	57	4.73056e-05	2.16992e-05	2.18006
sCache_3_3	Single cache domain 3	15	28	2.36528e-05	1.08496e-05	2.18006
BNR_2	BNR repeat-like domain	111	202	0.000165569	7.59472e-05	2.18006
AAA_5	AAA domain (dynein-related subfamily)	325	591	0.000481926	0.000221482	2.17592
YHS	YHS domain	21	39	3.25226e-05	1.4965e-05	2.17325
RNA_ligase	RNA ligase	21	39	3.25226e-05	1.4965e-05	2.17325
rve	Integrase core domain	6479	11782	0.00957938	0.00440831	2.17303
SoxG	Sarcosine oxidase, gamma subunit family	60	110	9.01763e-05	4.15278e-05	2.17147
Peptidase_A24	Type IV leader peptidase family	177	323	0.000263137	0.000121216	2.17081
LEH	Limonene-1,2-epoxide hydrolase catalytic domain	16	30	2.51311e-05	1.15979e-05	2.16687
Hepar_II_III	Heparinase II/III-like protein	68	125	0.000102003	4.71397e-05	2.16384
PLDc_2	PLD-like domain	904	1652	0.00133786	0.000618428	2.16333
DUF302	Domain of unknown function DUF302	82	151	0.000122699	5.68669e-05	2.15765
Y1_Tnp	Transposase IS200 like	489	897	0.000724367	0.000335964	2.15609
CBM9_2	Carbohydrate-binding family 9	5	10	8.8698e-06	4.11537e-06	2.15529
DUF3797	Domain of unknown function (DUF3797)	5	10	8.8698e-06	4.11537e-06	2.15529
DUF4243	Protein of unknown function (DUF4243)	5	10	8.8698e-06	4.11537e-06	2.15529
DUF3365	Protein of unknown function (DUF3365)	29	54	4.4349e-05	2.05768e-05	2.15529
AbiEi_1	AbiEi antitoxin C-terminal domain	11	21	1.77396e-05	8.23074e-06	2.15529
DUF2282	Predicted integral membrane protein (DUF2282)	61	113	9.16546e-05	4.26502e-05	2.14898
TetR_C_5	QacR-like protein, C-terminal region	18	34	2.80877e-05	1.30944e-05	2.14502
SBP_bac_8	Bacterial extracellular solute-binding protein	1508	2780	0.00223075	0.00104044	2.14405
Peptidase_M73	Camelysin metallo-endopeptidase	31	58	4.73056e-05	2.20733e-05	2.14311
MqsA_antitoxin	Antitoxin component of bacterial toxin-antitoxin system, MqsA	32	60	4.87839e-05	2.28216e-05	2.13762
DctQ	Tripartite ATP-independent periplasmic transporters, DctQ component	525	974	0.000777585	0.000364771	2.13171
Darcynin	Darcynin, domain of unknown function	6	12	1.03481e-05	4.86362e-06	2.12765
DUF790	Protein of unknown function (DUF790)	6	12	1.03481e-05	4.86362e-06	2.12765
DUF3884	Protein of unknown function (DUF3884)	6	12	1.03481e-05	4.86362e-06	2.12765
Sipho_Gp157	Siphovirus Gp157	27	51	4.13924e-05	1.94545e-05	2.12765
IalB	Invasion associated locus B (IalB) protein	34	64	5.17405e-05	2.43181e-05	2.12765
Minor_capsid_1	Minor capsid protein	6	12	1.03481e-05	4.86362e-06	2.12765
Minor_capsid_3	Minor capsid protein from bacteriophage	6	12	1.03481e-05	4.86362e-06	2.12765
ATP-grasp_3	ATP-grasp domain	34	64	5.17405e-05	2.43181e-05	2.12765
Zn_ribbon_recom	Recombinase zinc beta ribbon domain	6	12	1.03481e-05	4.86362e-06	2.12765
Penicillinase_R	Penicillinase repressor	176	330	0.000261659	0.000123835	2.11296
ATP-grasp_4	ATP-grasp domain	85	160	0.000127134	6.0234e-05	2.11066
Urate_ox_N	Urate oxidase N-terminal	54	102	8.13065e-05	3.85348e-05	2.10995
DUF2950	Protein of unknown function (DUF2950)	55	104	8.27848e-05	3.92831e-05	2.10739
DUF4284	Immunity protein 22	7	14	1.18264e-05	5.61187e-06	2.10739
EF-hand_5	EF hand	50	95	7.53933e-05	3.59159e-05	2.09916
Alpha-L-AF_C	Alpha-L-arabinofuranosidase C-terminal domain	76	144	0.000113829	5.4248e-05	2.09831
Fil_haemagg_2	Haemagluttinin repeat	102	193	0.000152265	7.25801e-05	2.09789
PAS_3	PAS fold	224	423	0.000332617	0.000158629	2.09683
Bro-N	BRO family, N-terminal domain	77	146	0.000115307	5.49963e-05	2.09664
MT-A70	MT-A70	28	54	4.28707e-05	2.05768e-05	2.08344
Endonuclease_NS	DNA/RNA non-specific endonuclease	115	219	0.000171483	8.23074e-05	2.08344
HSDR_N	Type I restriction enzyme R protein N terminus (HSDR_N)	107	204	0.000159656	7.66955e-05	2.08169
HrpB1_HrpK	Bacterial type III secretion protein (HrpB1_HrpK)	19	37	2.9566e-05	1.42167e-05	2.07966
DHHA2	DHHA2 domain	9	18	1.4783e-05	7.10836e-06	2.07966
DUF1254	Protein of unknown function (DUF1254)	73	140	0.000109394	5.27515e-05	2.07376
DUF2269	Predicted integral membrane protein (DUF2269)	32	62	4.87839e-05	2.35698e-05	2.06976
Serpin	Serpin (serine protease inhibitor)	21	41	3.25226e-05	1.57132e-05	2.06976
ETC_C1_NDUFA4	ETC complex I subunit conserved region	21	41	3.25226e-05	1.57132e-05	2.06976
PI-PLC-X	Phosphatidylinositol-specific phospholipase C, X domain	21	41	3.25226e-05	1.57132e-05	2.06976
SLH	S-layer homology domain	237	454	0.000351835	0.000170227	2.06686
DUF4150	Domain of unknown function (DUF4150)	45	87	6.80018e-05	3.29229e-05	2.06548
DUF2829	Protein of unknown function (DUF2829)	35	68	5.32188e-05	2.58146e-05	2.06158
Bmp	ABC transporter substrate-binding protein PnrA-like	207	400	0.000307486	0.000150024	2.04958
DUF3732	Protein of unknown function (DUF3732)	13	26	2.06962e-05	1.01014e-05	2.04885
Dak2	DAK2 domain	141	273	0.000209918	0.00010251	2.04778
DUF1906	Domain of unknown function (DUF1906)	42	82	6.35669e-05	3.10523e-05	2.04709
DUF4411	Domain of unknown function (DUF4411)	14	28	2.21745e-05	1.08496e-05	2.04381
DUF2283	Protein of unknown function (DUF2283)	15	30	2.36528e-05	1.15979e-05	2.03941
T3SS_needle_F	Type III secretion needle MxiH, YscF, SsaG, EprI, PscF, EscF	66	129	9.90461e-05	4.86362e-05	2.03647
BetR	BetR domain	16	32	2.51311e-05	1.23461e-05	2.03555
CbtB	Probable cobalt transporter subunit (CbtB)	33	65	5.02622e-05	2.46922e-05	2.03555
DUF4351	Domain of unknown function (DUF4351)	17	34	2.66094e-05	1.30944e-05	2.03213
Phasin_2	Phasin protein	96	188	0.000143395	7.07095e-05	2.02795
DDE_Tnp_1_3	Transposase DDE domain	135	264	0.000201049	9.9143e-05	2.02787
GMC_oxred_N	GMC oxidoreductase	345	674	0.000511492	0.000252534	2.02544
DUF4365	Domain of unknown function (DUF4365)	20	40	3.10443e-05	1.53391e-05	2.02387
Glyco_hydro_88	Glycosyl Hydrolase Family 88	126	247	0.000187744	9.27828e-05	2.02348
Phycobilisome	Phycobilisome protein	21	42	3.25226e-05	1.60873e-05	2.02163
DUF892	Domain of unknown function (DUF892)	150	295	0.000223223	0.000110741	2.01573
RecT	RecT family	106	209	0.000158178	7.85661e-05	2.01331
LANC_like	Lanthionine synthetase C-like protein	27	54	4.13924e-05	2.05768e-05	2.0116
DUF917	Protein of unknown function (DUF917)	31	62	4.73056e-05	2.35698e-05	2.00704
PGA_cap	Bacterial capsule synthesis protein PGA_cap	121	241	0.000180353	9.05381e-05	1.99201
DinI	DinI-like family	136	271	0.000202527	0.000101762	1.99021
GFO_IDH_MocA	Oxidoreductase family, NAD-binding Rossmann fold	1316	2627	0.00194692	0.000983199	1.98019
Thy1	Thymidylate synthase complementing protein	63	127	9.46112e-05	4.78879e-05	1.97568
EcKinase	Ecdysteroid kinase	15	31	2.36528e-05	1.1972e-05	1.97568
DUF1579	Protein of unknown function (DUF1579)	7	15	1.18264e-05	5.986e-06	1.97568
DUF1983	Domain of unknown function (DUF1983)	31	63	4.73056e-05	2.3944e-05	1.97568
AOX	Alternative oxidase	7	15	1.18264e-05	5.986e-06	1.97568
Terminase_6C	Terminase RNaseH-like domain	31	63	4.73056e-05	2.3944e-05	1.97568
Lipocalin_5	Lipocalin-like domain	20	41	3.10443e-05	1.57132e-05	1.97568
DUF3990	Protein of unknown function (DUF3990)	7	15	1.18264e-05	5.986e-06	1.97568
Y_phosphatase2	Tyrosine phosphatase family	7	15	1.18264e-05	5.986e-06	1.97568
AbrB-like	AbrB-like transcriptional regulator	6	13	1.03481e-05	5.23774e-06	1.97568
DUF2255	Uncharacterized protein conserved in bacteria (DUF2255)	12	25	1.92179e-05	9.72723e-06	1.97568
DUF5011	Domain of unknown function (DUF5011)	24	49	3.69575e-05	1.87062e-05	1.97568
DUF4143	Domain of unknown function (DUF4143)	58	117	8.72197e-05	4.41467e-05	1.97568
DDE_Tnp_4	DDE superfamily endonuclease	58	117	8.72197e-05	4.41467e-05	1.97568
DUF4347	Domain of unknown function (DUF4347)	17	35	2.66094e-05	1.34685e-05	1.97568
Pentapeptide_3	Pentapeptide repeats (9 copies)	14	29	2.21745e-05	1.12237e-05	1.97568
Malectin	Di-glucose binding within endoplasmic reticulum	9	19	1.4783e-05	7.48249e-06	1.97568
DUF1659	Protein of unknown function (DUF1659)	16	33	2.51311e-05	1.27202e-05	1.97568
Sipho_Gp37	Siphovirus ReqiPepy6 Gp37-like protein	5	11	8.8698e-06	4.48949e-06	1.97568
DUF3005	Protein of unknown function (DUF3005)	16	33	2.51311e-05	1.27202e-05	1.97568
Coq4	Coenzyme Q (ubiquinone) biosynthesis protein Coq4	10	21	1.62613e-05	8.23074e-06	1.97568
Cas_Cas4	Domain of unknown function DUF83	33	67	5.02622e-05	2.54405e-05	1.97568
DUF3801	Protein of unknown function (DUF3801)	5	11	8.8698e-06	4.48949e-06	1.97568
RnlA_toxin	RNase LS, bacterial toxin	5	11	8.8698e-06	4.48949e-06	1.97568
Me-amine-dh_L	Methylamine dehydrogenase, L chain	5	11	8.8698e-06	4.48949e-06	1.97568
PilX_N	PilX N-terminal	16	33	2.51311e-05	1.27202e-05	1.97568
DUF4287	Domain of unknown function (DUF4287)	21	43	3.25226e-05	1.64615e-05	1.97568
DUF2963	Protein of unknown function (DUF2963)	21	43	3.25226e-05	1.64615e-05	1.97568
DUF1852	Domain of unknown function (DUF1852)	34	69	5.17405e-05	2.61887e-05	1.97568
DUF4872	Domain of unknown function (DUF4872)	11	23	1.77396e-05	8.979e-06	1.97568
Phage-tail_3	Putative phage tail protein	82	165	0.000122699	6.21046e-05	1.97568
Dak1	Dak1 domain	194	390	0.000288268	0.000146283	1.97063
DHDPS	Dihydrodipicolinate synthetase family	775	1555	0.00114716	0.000582137	1.9706
ImpA_N	ImpA, N-terminal, type VI secretion system	104	210	0.000155221	7.89402e-05	1.96632
MG1	Alpha-2-macroglobulin MG1 domain	77	156	0.000115307	5.87375e-05	1.9631
HlyD_3	HlyD family secretion protein	761	1534	0.00112646	0.000574281	1.96152
DUF2188	Uncharacterized protein conserved in bacteria (DUF2188)	41	84	6.20886e-05	3.18006e-05	1.95244
BBP2	Putative beta-barrel porin-2, OmpL-like. bbp2	31	64	4.73056e-05	2.43181e-05	1.94528
Ring_hydroxyl_A	Ring hydroxylating alpha subunit (catalytic domain)	210	428	0.000311921	0.000160499	1.94344
DUF2189	Predicted integral membrane protein (DUF2189)	28	58	4.28707e-05	2.20733e-05	1.94219
Methylase_S	Type I restriction modification DNA specificity domain	338	689	0.000501143	0.000258146	1.94132
RicinB_lectin_2	Ricin-type beta-trefoil lectin domain-like	52	107	7.83499e-05	4.04054e-05	1.93909
Ring_hydroxyl_B	Ring hydroxylating beta subunit	131	268	0.000195135	0.00010064	1.93896
Methyltransf_21	Methyltransferase FkbM domain	112	230	0.000167048	8.64227e-05	1.93292
DUF2334	Uncharacterized protein conserved in bacteria (DUF2334)	43	89	6.50452e-05	3.36712e-05	1.93178
YadA_head	Head domain of trimeric autotransporter adhesin	53	110	7.98282e-05	4.15278e-05	1.92228
DUF4214	Domain of unknown function (DUF4214)	17	36	2.66094e-05	1.38426e-05	1.92228
PqqD	Coenzyme PQQ synthesis protein D (PqqD)	65	135	9.75678e-05	5.08809e-05	1.91757
MEDS	MEDS: MEthanogen/methylotroph, DcmR Sensory domain	15	32	2.36528e-05	1.23461e-05	1.91581
Bac_rhamnosid6H	Bacterial alpha-L-rhamnosidase 6 hairpin glycosidase domain	61	127	9.16546e-05	4.78879e-05	1.91394
Ald_Xan_dh_C2	Molybdopterin-binding domain of aldehyde dehydrogenase	476	986	0.000705149	0.000369261	1.90962
HSP20	Hsp20/alpha crystallin family	434	903	0.00064306	0.000338208	1.90137
Adenine_deam_C	Adenine deaminase C-terminal domain	101	211	0.000150787	7.93144e-05	1.90113
SseC	Secretion system effector C (SseC) like family	62	130	9.31329e-05	4.90103e-05	1.90027
zf-ISL3	zinc-finger of transposase IS204/IS1001/IS1096/IS1165	32	68	4.87839e-05	2.58146e-05	1.88978
KduI	KduI/IolB family	151	317	0.000224702	0.000118972	1.8887
Glyoxalase_4	Glyoxalase/Bleomycin resistance protein/Dioxygenase superfamily	134	282	0.00019957	0.000105877	1.88492
YfdX	YfdX protein	50	106	7.53933e-05	4.00313e-05	1.88336
MR_MLE_C	Enolase C-terminal domain-like	755	1586	0.00111759	0.000593735	1.88231
PglZ	PglZ domain	29	62	4.4349e-05	2.35698e-05	1.8816
Cupin_3	Protein of unknown function (DUF861)	153	323	0.000227658	0.000121216	1.87811
NHase_alpha	Nitrile hydratase, alpha chain	18	39	2.80877e-05	1.4965e-05	1.8769
UxuA	D-mannonate dehydratase (UxuA)	122	258	0.000181831	9.68982e-05	1.87651
BPD_transp_1	Binding-protein-dependent transport system inner membrane component	10989	23143	0.0162465	0.00865873	1.87631
DUF2716	Protein of unknown function (DUF2716)	8	18	1.33047e-05	7.10836e-06	1.8717
DUF2242	Uncharacterized protein conserved in bacteria (DUF2242)	16	35	2.51311e-05	1.34685e-05	1.86592
p450	Cytochrome P450	601	1275	0.000889936	0.000477383	1.8642
DUF1064	Protein of unknown function (DUF1064)	15	33	2.36528e-05	1.27202e-05	1.85946
Glyco_hydro_70	Glycosyl hydrolase family 70	7	16	1.18264e-05	6.36011e-06	1.85946
DUF4352	Domain of unknown function (DUF4352)	38	82	5.76537e-05	3.10523e-05	1.85666
CbiG_C	Cobalamin synthesis G C-terminus	45	97	6.80018e-05	3.66642e-05	1.85472
Ead_Ea22	Ead/Ea22-like protein	29	63	4.4349e-05	2.3944e-05	1.8522
Esterase_phd	Esterase PHB depolymerase	81	174	0.000121221	6.54718e-05	1.85149
Exosortase_EpsH	Transmembrane exosortase (Exosortase_EpsH)	21	46	3.25226e-05	1.75838e-05	1.84957
Thioredoxin_2	Thioredoxin-like domain	230	493	0.000341487	0.000184817	1.8477
E1-E2_ATPase	E1-E2 ATPase	1191	2549	0.00176213	0.000954017	1.84707
DUF2171	Uncharacterized protein conserved in bacteria (DUF2171)	13	29	2.06962e-05	1.12237e-05	1.84397
SnoaL_2	SnoaL-like domain	312	670	0.000462708	0.000251037	1.84318
Amidohydro_2	Amidohydrolase	471	1012	0.000697757	0.000378988	1.84111
Fer2_4	2Fe-2S iron-sulfur cluster binding domain	115	248	0.000171483	9.3157e-05	1.84079
YopX	YopX protein	33	72	5.02622e-05	2.73111e-05	1.84036
WD40	WD domain, G-beta repeat	80	173	0.000119742	6.50976e-05	1.83943
CHAT	CHAT domain	58	126	8.72197e-05	4.75138e-05	1.83567
Glyco_hydro_3_C	Glycosyl hydrolase family 3 C-terminal domain	92	200	0.000137482	7.5199e-05	1.82824
Multi_Drug_Res	Small Multidrug Resistance protein	543	1177	0.000804195	0.000440718	1.82474
EB_dh	Ethylbenzene dehydrogenase	5	12	8.8698e-06	4.86362e-06	1.8237
DUF4278	Domain of unknown function (DUF4278)	5	12	8.8698e-06	4.86362e-06	1.8237
Peptidase_C47	Staphopain peptidase C47	11	25	1.77396e-05	9.72723e-06	1.8237
Imm30	Immunity protein 30	5	12	8.8698e-06	4.86362e-06	1.8237
PLDc	Phospholipase D Active site motif	5	12	8.8698e-06	4.86362e-06	1.8237
Eco57I	Eco57I restriction-modification methylase	29	64	4.4349e-05	2.43181e-05	1.8237
Spond_N	Spondin_N	5	12	8.8698e-06	4.86362e-06	1.8237
DUF3553	Protein of unknown function (DUF3553)	5	12	8.8698e-06	4.86362e-06	1.8237
PQ-loop	PQ loop repeat	22	49	3.40009e-05	1.87062e-05	1.81762
Toxin_15	ShET2 enterotoxin, N-terminal region	33	73	5.02622e-05	2.76852e-05	1.81549
DUF2922	Protein of unknown function (DUF2922)	33	73	5.02622e-05	2.76852e-05	1.81549
Beta_helix	Right handed beta helix region	134	293	0.00019957	0.000109993	1.8144
HisKA_2	Histidine kinase	55	121	8.27848e-05	4.56432e-05	1.81374
CRISPR_Cas2	CRISPR associated protein Cas2	76	167	0.000113829	6.28529e-05	1.81104
DUF2642	Protein of unknown function (DUF2642)	10	23	1.62613e-05	8.979e-06	1.81104
DUF2324	Putative membrane peptidase family (DUF2324)	21	47	3.25226e-05	1.7958e-05	1.81104
PAS_7	PAS fold	70	154	0.000104959	5.79893e-05	1.80998
PAS_4	PAS fold	168	368	0.000249833	0.000138052	1.8097
AAA	ATPase family associated with various cellular activities (AAA)	375	820	0.00055584	0.000307156	1.80964
Abi	CAAX protease self-immunity	518	1134	0.000767237	0.000424631	1.80683
DUF1911	Domain of unknown function (DUF1911)	15	34	2.36528e-05	1.30944e-05	1.80634
DUF1194	Protein of unknown function (DUF1194)	15	34	2.36528e-05	1.30944e-05	1.80634
NMT1_2	NMT1-like family	305	669	0.00045236	0.000250663	1.80465
AAA_30	AAA domain	252	553	0.00037401	0.000207265	1.8045
VirJ	Bacterial virulence protein (VirJ)	25	56	3.84358e-05	2.13251e-05	1.80237
Collagen_mid	Bacterial collagen, middle region	51	113	7.68716e-05	4.26502e-05	1.80237
peroxidase	Peroxidase	139	306	0.000206962	0.000114856	1.80192
NMT1	NMT1/THI5 like	536	1178	0.000793847	0.000441093	1.79973
PAS_9	PAS domain	136	300	0.000202527	0.000112611	1.79846
ATP_transf	ATP adenylyltransferase	4	10	7.3915e-06	4.11537e-06	1.79607
DUF1127	Domain of unknown function (DUF1127)	89	197	0.000133047	7.40766e-05	1.79607
DUF4083	Domain of unknown function (DUF4083)	4	10	7.3915e-06	4.11537e-06	1.79607
DUF1896	Domain of unknown function (DUF1896)	4	10	7.3915e-06	4.11537e-06	1.79607
Glyco_transf_21	Glycosyl transferase family 21	44	98	6.65235e-05	3.70383e-05	1.79607
DUF1344	Protein of unknown function (DUF1344)	4	10	7.3915e-06	4.11537e-06	1.79607
DUF4133	Domain of unknown function (DUF4133)	4	10	7.3915e-06	4.11537e-06	1.79607
DctP	Bacterial extracellular solute-binding protein, family 7	588	1299	0.000870718	0.000486362	1.79027
DUF4231	Protein of unknown function (DUF4231)	13	30	2.06962e-05	1.15979e-05	1.78448
rhaM	L-rhamnose mutarotase	90	201	0.000134525	7.55731e-05	1.78007
Peripla_BP_3	Periplasmic binding protein-like domain	1666	3700	0.00246432	0.00138463	1.77977
DUF1622	Protein of unknown function (DUF1622)	17	39	2.66094e-05	1.4965e-05	1.77811
DUF2924	Protein of unknown function (DUF2924)	8	19	1.33047e-05	7.48249e-06	1.77811
An_peroxidase	Animal haem peroxidase	17	39	2.66094e-05	1.4965e-05	1.77811
SBP_bac_5	Bacterial extracellular solute-binding proteins, family 5 Middle	1869	4158	0.00276442	0.00155598	1.77664
DUF3299	Protein of unknown function (DUF3299)	39	88	5.9132e-05	3.32971e-05	1.77589
TPR_12	Tetratricopeptide repeat	251	560	0.000372531	0.000209884	1.77494
DUF1353	Protein of unknown function (DUF1353)	12	28	1.92179e-05	1.08496e-05	1.7713
CMD	Carboxymuconolactone decarboxylase family	679	1518	0.00100524	0.000568295	1.76888
ADH_zinc_N_2	Zinc-binding dehydrogenase	301	676	0.000446446	0.000253282	1.76264
VKOR	Vitamin K epoxide reductase family	32	73	4.87839e-05	2.76852e-05	1.76209
Asparaginase_II	L-asparaginase II	31	71	4.73056e-05	2.6937e-05	1.75616
FlbT	Flagellar protein FlbT	15	35	2.36528e-05	1.34685e-05	1.75616
DUF2076	Uncharacterized protein conserved in bacteria (DUF2076)	31	71	4.73056e-05	2.6937e-05	1.75616
Cadherin	Cadherin domain	7	17	1.18264e-05	6.73424e-06	1.75616
DUF475	Protein of unknown function (DUF475)	35	80	5.32188e-05	3.03041e-05	1.75616
ETF	Electron transfer flavoprotein domain	422	951	0.000625321	0.000356166	1.7557
DnaJ	DnaJ domain	182	412	0.000270529	0.000154513	1.75084
AAA_19	AAA domain	65	148	9.75678e-05	5.57445e-05	1.75027
AcetDehyd-dimer	Prokaryotic acetaldehyde dehydrogenase, dimerisation	61	139	9.16546e-05	5.23774e-05	1.74989
ANTAR	ANTAR domain	105	239	0.0001567	8.97898e-05	1.74518
NmrA	NmrA-like family	152	346	0.00022618	0.000129821	1.74224
SMI1_KNR4	SMI1 / KNR4 family (SUKH-1)	40	92	6.06103e-05	3.47936e-05	1.742
AAA_21	AAA domain, putative AbiEii toxin, Type IV TA system	206	469	0.000306008	0.000175839	1.74028
DUF1529	Domain of Unknown Function (DUF1259)	21	49	3.25226e-05	1.87062e-05	1.7386
Hydant_A_N	Hydantoinase/oxoprolinase N-terminal region	21	49	3.25226e-05	1.87062e-05	1.7386
FGase	N-formylglutamate amidohydrolase	138	315	0.000205484	0.000118223	1.7381
DUF1704	Domain of unknown function (DUF1704)	28	65	4.28707e-05	2.46922e-05	1.7362
DUF4926	Domain of unknown function (DUF4926)	17	40	2.66094e-05	1.53391e-05	1.73474
Creatininase	Creatinine amidohydrolase	81	186	0.000121221	6.99613e-05	1.73268
DUF2491	Protein of unknown function (DUF2491)	31	72	4.73056e-05	2.73111e-05	1.7321
Ion_trans_2	Ion channel	123	282	0.000183309	0.000105877	1.73134
Glycoamylase	Putative glucoamylase	20	47	3.10443e-05	1.7958e-05	1.72872
AraC_binding_2	AraC-binding-like domain	90	207	0.000134525	7.78179e-05	1.72872
LAGLIDADG_3	LAGLIDADG-like domain	6	15	1.03481e-05	5.986e-06	1.72872
TROVE	TROVE domain	6	15	1.03481e-05	5.986e-06	1.72872
Rho_N	Rho termination factor, N-terminal domain	6	15	1.03481e-05	5.986e-06	1.72872
PDDEXK_4	PD-(D/E)XK nuclease superfamily	16	38	2.51311e-05	1.45909e-05	1.72239
HPP	HPP family	77	178	0.000115307	6.69683e-05	1.72182
DUF2083	Predicted transcriptional regulator (DUF2083)	53	123	7.98282e-05	4.63914e-05	1.72075
HTH_35	Winged helix-turn-helix DNA-binding	90	208	0.000134525	7.8192e-05	1.72045
MerR_2	MerR HTH family regulatory protein	76	176	0.000113829	6.622e-05	1.71895
LacY_symp	LacY proton/sugar symporter	99	229	0.00014783	8.60486e-05	1.71798
DNase_NucA_NucB	Deoxyribonuclease NucA/NucB	19	45	2.9566e-05	1.72097e-05	1.71798
Peptidase_C70	Papain-like cysteine protease AvrRpt2	9	22	1.4783e-05	8.60486e-06	1.71798
Choline_kinase	Choline/ethanolamine kinase	28	66	4.28707e-05	2.50663e-05	1.71029
DGC	DGC domain	18	43	2.80877e-05	1.64615e-05	1.70627
Cupredoxin_1	Cupredoxin-like domain	74	173	0.000110872	6.50976e-05	1.70317
McrBC	McrBC 5-methylcytosine restriction system component	42	99	6.35669e-05	3.74124e-05	1.69908
DDE_Tnp_IS1595	ISXO2-like transposase domain	137	320	0.000204005	0.000120094	1.69871
SdiA-regulated	SdiA-regulated	63	148	9.46112e-05	5.57445e-05	1.69723
DctM	Tripartite ATP-independent periplasmic transporter, DctM component	638	1487	0.000944633	0.000556697	1.69685
He_PIG	Putative Ig domain	20	48	3.10443e-05	1.83321e-05	1.69344
Cas_DxTHG	CRISPR-associated (Cas) DxTHG family	8	20	1.33047e-05	7.85661e-06	1.69344
Chaperone_III	Type III secretion chaperone domain	11	27	1.77396e-05	1.04755e-05	1.69344
Ntox44	Bacterial toxin 44	5	13	8.8698e-06	5.23774e-06	1.69344
RgpF	Rhamnan synthesis protein F	17	41	2.66094e-05	1.57132e-05	1.69344
DUF2887	Protein of unknown function (DUF2887)	8	20	1.33047e-05	7.85661e-06	1.69344
DUF3875	Domain of unknown function, B. Theta Gene description (DUF3875)	5	13	8.8698e-06	5.23774e-06	1.69344
TRAM	TRAM domain	25	60	3.84358e-05	2.28216e-05	1.68419
DUF1845	Domain of unknown function (DUF1845)	22	53	3.40009e-05	2.02027e-05	1.68299
MEKHLA	MEKHLA domain	16	39	2.51311e-05	1.4965e-05	1.67933
Pyr_redox_3	Pyridine nucleotide-disulphide oxidoreductase	244	576	0.000362183	0.00021587	1.67779
DUF2382	Domain of unknown function (DUF2382)	29	70	4.4349e-05	2.65628e-05	1.66959
Iron_transport	Fe2+ transport protein	42	101	6.35669e-05	3.81607e-05	1.66577
LHC	Antenna complex alpha/beta subunit	7	18	1.18264e-05	7.10836e-06	1.66373
PP2C	Protein phosphatase 2C	15	37	2.36528e-05	1.42167e-05	1.66373
DUF3311	Protein of unknown function (DUF3311)	41	99	6.20886e-05	3.74124e-05	1.65957
Glyco_transf_41	Glycosyl transferase family 41	41	99	6.20886e-05	3.74124e-05	1.65957
Prim_Zn_Ribbon	Zinc-binding domain of primase-helicase	12	30	1.92179e-05	1.15979e-05	1.65702
AAT	Acyl-coenzyme A:6-aminopenicillanic acid acyl-transferase	51	123	7.68716e-05	4.63914e-05	1.65702
Pilus_CpaD	Pilus biogenesis CpaD protein (pilus_cpaD)	12	30	1.92179e-05	1.15979e-05	1.65702
Integrase_1	Integrase	27	66	4.13924e-05	2.50663e-05	1.65131
Cytochrom_C_2	Cytochrome C'	47	114	7.09584e-05	4.30243e-05	1.64926
Chromate_transp	Chromate transporter	231	555	0.000342965	0.000208013	1.64877
17kDa_Anti_2	17 kDa outer membrane surface antigen	14	35	2.21745e-05	1.34685e-05	1.6464
DsbD	Cytochrome C biogenesis protein transmembrane region	164	395	0.000243919	0.000148153	1.6464
DUF1924	Domain of unknown function (DUF1924)	4	11	7.3915e-06	4.48949e-06	1.6464
DUF2290	Uncharacterized conserved protein (DUF2290)	4	11	7.3915e-06	4.48949e-06	1.6464
Prok-JAB	Prokaryotic homologs of the JAB domain	56	136	8.42631e-05	5.1255e-05	1.644
Inos-1-P_synth	Myo-inositol-1-phosphate synthase	31	76	4.73056e-05	2.88076e-05	1.64212
FAD-SLDH	Membrane bound FAD containing D-sorbitol dehydrogenase	21	52	3.25226e-05	1.98286e-05	1.64019
VipB	Type VI secretion protein, EvpB/VC_A0108, tail sheath	140	339	0.00020844	0.000127202	1.63865
ADH_N	Alcohol dehydrogenase GroES-like domain	1137	2745	0.0016823	0.00102735	1.63753
Glucodextran_N	Glucodextranase, domain N	11	28	1.77396e-05	1.08496e-05	1.63504
DUF1203	Protein of unknown function (DUF1203)	11	28	1.77396e-05	1.08496e-05	1.63504
DUF4910	Domain of unknown function (DUF4910)	11	28	1.77396e-05	1.08496e-05	1.63504
Glyco_hydro_32N	Glycosyl hydrolases family 32 N-terminal domain	158	385	0.00023505	0.000144412	1.62763
Mito_fiss_Elm1	Mitochondrial fission ELM1	20	50	3.10443e-05	1.90803e-05	1.62703
DUF2272	Uncharacterized protein conserved in bacteria (DUF2272)	6	16	1.03481e-05	6.36011e-06	1.62703
Astacin	Astacin (Peptidase family M12A)	6	16	1.03481e-05	6.36011e-06	1.62703
sCache_2	Single Cache domain 2	55	135	8.27848e-05	5.08809e-05	1.62703
T6SS_VipA	Type VI secretion system, VipA, VC_A0107 or Hcp2	127	311	0.000189222	0.000116727	1.62107
YcaO	YcaO cyclodehydratase, ATP-ad Mg2+-binding	127	311	0.000189222	0.000116727	1.62107
DnaB	DnaB-like helicase N terminal domain	24	60	3.69575e-05	2.28216e-05	1.61941
Peptidase_M15_4	D-alanyl-D-alanine carboxypeptidase	67	165	0.000100524	6.21046e-05	1.61863
DUF2145	Uncharacterized protein conserved in bacteria (DUF2145)	17	43	2.66094e-05	1.64615e-05	1.61646
Terminase_4	Phage terminase, small subunit	62	153	9.31329e-05	5.76152e-05	1.61646
DUF3416	Domain of unknown function (DUF3416)	61	151	9.16546e-05	5.68669e-05	1.61174
NYN	NYN domain	118	291	0.000175918	0.000109244	1.61031
Trns_repr_metal	Metal-sensitive transcriptional repressor	255	629	0.000378445	0.000235698	1.60563
CBM_4_9	Carbohydrate binding domain	12	31	1.92179e-05	1.1972e-05	1.60524
DUF1706	Protein of unknown function (DUF1706)	35	88	5.32188e-05	3.32971e-05	1.5983
Pentapeptide	Pentapeptide repeats (8 copies)	240	598	0.00035627	0.000224101	1.58978
Bac_luciferase	Luciferase-like monooxygenase	1104	2755	0.00163352	0.00103109	1.58427
adh_short_C2	Enoyl-(Acyl carrier protein) reductase	3650	9119	0.00539727	0.00341201	1.58184
Imm8	Immunity protein 8	7	19	1.18264e-05	7.48249e-06	1.58054
DUF4391	Domain of unknown function (DUF4391)	11	29	1.77396e-05	1.12237e-05	1.58054
MFS_3	Transmembrane secretion effector	191	480	0.000283833	0.000179954	1.57726
ABATE	Putative stress-induced transcription regulator	30	77	4.58273e-05	2.91817e-05	1.57041
PAAR_motif	PAAR motif	154	389	0.000229136	0.000145908	1.57041
DUF983	Protein of unknown function (DUF983)	28	72	4.28707e-05	2.73111e-05	1.56972
Lyase_aromatic	Aromatic amino acid lyase	174	440	0.000258702	0.000164989	1.568
Ribonuc_L-PSP	Endoribonuclease L-PSP	718	1811	0.0010629	0.000677913	1.5679
Alginate_exp	Alginate export	47	120	7.09584e-05	4.5269e-05	1.56748
Pentapeptide_4	Pentapeptide repeats (9 copies)	93	236	0.00013896	8.86675e-05	1.56721
DUF2141	Uncharacterized protein conserved in bacteria (DUF2141)	22	57	3.40009e-05	2.16992e-05	1.56692
Cna_B	Cna protein B-type domain	20	52	3.10443e-05	1.98286e-05	1.56563
DUF1059	Protein of unknown function (DUF1059)	20	52	3.10443e-05	1.98286e-05	1.56563
Cas_Cas5d	CRISPR-associated protein (Cas_Cas5)	58	148	8.72197e-05	5.57445e-05	1.56463
Phage_Mu_Gam	Bacteriophage Mu Gam like protein	16	42	2.51311e-05	1.60873e-05	1.56216
Glyco_tran_WbsX	Glycosyltransferase WbsX	16	42	2.51311e-05	1.60873e-05	1.56216
FMN_red	NADPH-dependent FMN reductase	631	1602	0.000934285	0.000599721	1.55787
T2SSF	Type II secretion system (T2SS), protein F	522	1326	0.00077315	0.000496463	1.55732
Phage_int_SAM_1	Phage integrase, N-terminal SAM-like domain	56	144	8.42631e-05	5.4248e-05	1.55329
AfaD	Enterobacteria AfaD invasin protein	10	27	1.62613e-05	1.04755e-05	1.55232
HTH_31	Helix-turn-helix domain	427	1089	0.000632712	0.000407796	1.55154
DUF1611	Domain of unknown function (DUF1611_C) P-loop domain	19	50	2.9566e-05	1.90803e-05	1.54955
Phosphonate-bd	ABC transporter, phosphonate, periplasmic substrate-binding protein	186	476	0.000276442	0.000178457	1.54906
DUF3047	Protein of unknown function (DUF3047)	8	22	1.33047e-05	8.60486e-06	1.54618
DUF3880	DUF based on E. rectale Gene description (DUF3880)	8	22	1.33047e-05	8.60486e-06	1.54618
DUF1028	Family of unknown function (DUF1028)	33	86	5.02622e-05	3.25488e-05	1.54421
DUF4355	Domain of unknown function (DUF4355)	15	40	2.36528e-05	1.53391e-05	1.54199
HTH_26	Cro/C1-type HTH DNA-binding domain	151	389	0.000224702	0.000145908	1.54002
zf-CGNR	CGNR zinc finger	43	112	6.50452e-05	4.22761e-05	1.53858
DUF3597	Domain of unknown function (DUF3597)	13	35	2.06962e-05	1.34685e-05	1.53664
Phytochelatin	Phytochelatin synthase	6	17	1.03481e-05	6.73424e-06	1.53664
DUF3923	Protein of unknown function (DUF3923)	6	17	1.03481e-05	6.73424e-06	1.53664
IpgD	Enterobacterial virulence protein IpgD	11	30	1.77396e-05	1.15979e-05	1.52956
UPF0160	Uncharacterised protein family (UPF0160)	11	30	1.77396e-05	1.15979e-05	1.52956
HTH_24	Winged helix-turn-helix DNA-binding	236	612	0.000350357	0.000229338	1.52769
XFP_N	XFP N-terminal domain	50	131	7.53933e-05	4.93844e-05	1.52666
DUF2165	Predicted small integral membrane protein (DUF2165)	21	56	3.25226e-05	2.13251e-05	1.52509
VIT1	VIT family	102	266	0.000152265	9.98912e-05	1.52431
LRR_5	Leucine rich repeats (6 copies)	31	82	4.73056e-05	3.10523e-05	1.52342
Chal_sti_synt_N	Chalcone and stilbene synthases, N-terminal domain	31	82	4.73056e-05	3.10523e-05	1.52342
T6SS_TssG	Type VI secretion, TssG	127	331	0.000189222	0.000124209	1.52342
3-dmu-9_3-mt	3-demethylubiquinone-9 3-methyltransferase	147	383	0.000218788	0.000143664	1.52292
AAA_33	AAA domain	120	313	0.000178874	0.000117475	1.52266
Flavodoxin_4	Flavodoxin	19	51	2.9566e-05	1.94545e-05	1.51975
DUF3914	Protein of unknown function (DUF3914)	4	12	7.3915e-06	4.86362e-06	1.51975
DUF1186	Protein of unknown function (DUF1186)	4	12	7.3915e-06	4.86362e-06	1.51975
XFP_C	XFP C-terminal domain	4	12	7.3915e-06	4.86362e-06	1.51975
DUF3387	Domain of unknown function (DUF3387)	44	116	6.65235e-05	4.37726e-05	1.51975
SCIFF	Six-cysteine peptide SCIFF	4	12	7.3915e-06	4.86362e-06	1.51975
YjgF_endoribonc	YjgF/chorismate_mutase-like, putative endoribonuclease	94	246	0.000140438	9.24087e-05	1.51975
Glyco_tran_28_C	Glycosyltransferase family 28 C-terminal domain	112	294	0.000167048	0.000110367	1.51357
HAMP	HAMP domain	48	127	7.24367e-05	4.78879e-05	1.51263
ChaC	ChaC-like protein	79	208	0.000118264	7.8192e-05	1.51248
KTSC	KTSC domain	30	80	4.58273e-05	3.03041e-05	1.51225
Sortase	Sortase family	186	488	0.000276442	0.000182947	1.51105
DUF4386	Domain of unknown function (DUF4386)	12	33	1.92179e-05	1.27202e-05	1.51081
Ectoine_synth	Ectoine synthase	20	54	3.10443e-05	2.05768e-05	1.5087
DUF4242	Protein of unknown function (DUF4242)	18	49	2.80877e-05	1.87062e-05	1.50152
ComA	(2R)-phospho-3-sulfolactate synthase (ComA)	10	28	1.62613e-05	1.08496e-05	1.49879
DUF3274	Protein of unknown function (DUF3274)	10	28	1.62613e-05	1.08496e-05	1.49879
YukC	WXG100 protein secretion system (Wss), protein YukC	24	65	3.69575e-05	2.46922e-05	1.49673
MethyltransfD12	D12 class N6 adenine-specific DNA methyltransferase	181	480	0.000269051	0.000179954	1.49511
CbiC	Precorrin-8X methylmutase	92	245	0.000137482	9.20346e-05	1.49381
DUF2235	Uncharacterized alpha/beta hydrolase domain (DUF2235)	56	150	8.42631e-05	5.64928e-05	1.49157
Nuc_deoxyrib_tr	Nucleoside 2-deoxyribosyltransferase	42	113	6.35669e-05	4.26502e-05	1.49042
Laminin_G_3	Concanavalin A-like lectin/glucanases superfamily	54	145	8.13065e-05	5.46222e-05	1.48853
DotU	Type VI secretion system protein DotU	124	331	0.000184787	0.000124209	1.48771
T2SSM_b	Type II secretion system (T2SS), protein M subtype b	5	15	8.8698e-06	5.986e-06	1.48176
DUF4405	Domain of unknown function (DUF4405)	8	23	1.33047e-05	8.979e-06	1.48176
SNF2_N	SNF2 family N-terminal domain	187	501	0.00027792	0.00018781	1.47979
Carb_anhydrase	Eukaryotic-type carbonic anhydrase	39	106	5.9132e-05	4.00313e-05	1.47714
Peptidase_S8	Subtilase family	437	1172	0.000647495	0.000438848	1.47544
Tautomerase	Tautomerase enzyme	158	425	0.00023505	0.000159377	1.4748
ShlB	Haemolysin secretion/activation protein ShlB/FhaC/HecB	149	401	0.000221745	0.000150398	1.47439
Rieske	Rieske [2Fe-2S] domain	494	1326	0.000731758	0.000496463	1.47394
ADC	Acetoacetate decarboxylase (ADC)	43	117	6.50452e-05	4.41467e-05	1.47339
NapB	Nitrate reductase cytochrome c-type subunit (NapB)	53	144	7.98282e-05	5.4248e-05	1.47154
PsiE	Phosphate-starvation-inducible E	101	273	0.000150787	0.00010251	1.47094
DDE_Tnp_1_assoc	DDE_Tnp_1-associated	146	394	0.00021731	0.000147779	1.47051
Cyanate_lyase	Cyanate lyase C-terminal domain	41	112	6.20886e-05	4.22761e-05	1.46865
COX2	Cytochrome C oxidase subunit II, periplasmic domain	120	325	0.000178874	0.000121964	1.46661
TPR_11	TPR repeat	35	96	5.32188e-05	3.62901e-05	1.46648
NAD_binding_2	NAD binding domain of 6-phosphogluconate dehydrogenase	523	1411	0.000774629	0.000528264	1.46637
DM13	Electron transfer DM13	19	53	2.9566e-05	2.02027e-05	1.46347
DUF3100	Protein of unknown function (DUF3100)	9	26	1.4783e-05	1.01014e-05	1.46347
GUN4	GUN4-like	9	26	1.4783e-05	1.01014e-05	1.46347
RHS_repeat	RHS Repeat	249	674	0.000369575	0.000252534	1.46347
MbtH	MbtH-like protein	99	269	0.00014783	0.000101014	1.46347
HK97-gp10_like	Bacteriophage HK97-gp10, putative tail-component	30	83	4.58273e-05	3.14264e-05	1.45824
DUF3199	Protein of unknown function (DUF3199)	6	18	1.03481e-05	7.10836e-06	1.45576
DUF3750	Protein of unknown function (DUF3750)	6	18	1.03481e-05	7.10836e-06	1.45576
ParD_like	ParD-like antitoxin of type II bacterial toxin-antitoxin system	38	105	5.76537e-05	3.96572e-05	1.4538
COX1	Cytochrome C and Quinol oxidase polypeptide I	477	1299	0.000706627	0.000486362	1.45288
DUF2798	Protein of unknown function (DUF2798)	24	67	3.69575e-05	2.54405e-05	1.45271
TM2	TM2 domain	67	184	0.000100524	6.9213e-05	1.45239
DAO	FAD dependent oxidoreductase	1499	4082	0.00221745	0.00152755	1.45164
HTH_IclR	IclR helix-turn-helix domain	238	650	0.000353314	0.000243555	1.45065
DUF4183	Domain of unknown function (DUF4183)	10	29	1.62613e-05	1.12237e-05	1.44883
CofC	Guanylyl transferase CofC like	10	29	1.62613e-05	1.12237e-05	1.44883
PaaX	PaaX-like protein	26	73	3.99141e-05	2.76852e-05	1.44171
Glu_dehyd_C	Glucose dehydrogenase C-terminus	3	10	5.9132e-06	4.11537e-06	1.43686
GSCFA	GSCFA family	11	32	1.77396e-05	1.23461e-05	1.43686
PRCH	Photosynthetic reaction centre, H-chain N-terminal region	3	10	5.9132e-06	4.11537e-06	1.43686
DmpG_comm	DmpG-like communication domain	3	10	5.9132e-06	4.11537e-06	1.43686
Glyco_transf_7C	N-terminal domain of galactosyltransferase	3	10	5.9132e-06	4.11537e-06	1.43686
Lycopene_cycl	Lycopene cyclase protein	15	43	2.36528e-05	1.64615e-05	1.43686
PDDEXK_9	PD-(D/E)XK nuclease superfamily	3	10	5.9132e-06	4.11537e-06	1.43686
Phenol_hyd_sub	Phenol hydroxylase subunit	3	10	5.9132e-06	4.11537e-06	1.43686
BTAD	Bacterial transcriptional activator domain	88	244	0.000131569	9.16605e-05	1.43539
SnoaL_3	SnoaL-like domain	64	178	9.60895e-05	6.69683e-05	1.43485
TelA	Toxic anion resistance protein (TelA)	69	192	0.000103481	7.2206e-05	1.43314
AAA_24	AAA domain	24	68	3.69575e-05	2.58146e-05	1.43165
DUF2721	Protein of unknown function (DUF2721)	20	57	3.10443e-05	2.16992e-05	1.43066
DUF2976	Protein of unknown function (DUF2976)	16	46	2.51311e-05	1.75838e-05	1.42921
SipA	Salmonella invasion protein A	12	35	1.92179e-05	1.34685e-05	1.42688
DUF1003	Protein of unknown function (DUF1003)	47	132	7.09584e-05	4.97585e-05	1.42605
NIR_SIR_ferr	Nitrite/Sulfite reductase ferredoxin-like half domain	53	149	7.98282e-05	5.61187e-05	1.42249
POTRA_2	POTRA domain, ShlB-type	26	74	3.99141e-05	2.80593e-05	1.42249
Holin_BhlA	BhlA holin family	8	24	1.33047e-05	9.35311e-06	1.42249
YdjM	LexA-binding, inner membrane-associated putative hydrolase	161	450	0.000239484	0.00016873	1.41933
YscW	Type III secretion system lipoprotein chaperone (YscW)	50	141	7.53933e-05	5.31257e-05	1.41915
Nterm_IS4	Insertion element 4 transposase N-terminal	60	169	9.01763e-05	6.36011e-05	1.41784
DUF1488	Protein of unknown function (DUF1488)	66	186	9.90461e-05	6.99613e-05	1.41573
PEMT	Phospholipid methyltransferase	66	186	9.90461e-05	6.99613e-05	1.41573
Cytochrom_D1	Cytochrome D1 heme domain	33	94	5.02622e-05	3.55418e-05	1.41417
Glyco_hydro_15	Glycosyl hydrolases family 15	73	206	0.000109394	7.74437e-05	1.41256
Collagen	Collagen triple helix repeat (20 copies)	83	234	0.000124177	8.79192e-05	1.4124
PQQ_3	PQQ-like domain	14	41	2.21745e-05	1.57132e-05	1.4112
Whib	Transcription factor WhiB	99	279	0.00014783	0.000104755	1.4112
Phage_holin_4_1	Bacteriophage holin family	44	125	6.65235e-05	4.71397e-05	1.4112
ZinT	ZinT (YodA) periplasmic lipocalin-like zinc-recruitment	55	156	8.27848e-05	5.87375e-05	1.4094
LRR_4	Leucine Rich repeats (2 copies)	91	257	0.000136003	9.65241e-05	1.40901
Poly_export	Polysaccharide biosynthesis/export protein	183	515	0.000272007	0.000193048	1.40901
DUF1272	Protein of unknown function (DUF1272)	25	72	3.84358e-05	2.73111e-05	1.40733
Invas_SpaK	Invasion protein B family	15	44	2.36528e-05	1.68356e-05	1.40493
VirK	VirK protein	10	30	1.62613e-05	1.15979e-05	1.40209
Suc_Fer-like	Sucrase/ferredoxin-like	10	30	1.62613e-05	1.15979e-05	1.40209
DUF3734	Patatin phospholipase	27	78	4.13924e-05	2.95558e-05	1.40048
Phenol_MetA_deg	Putative MetA-pathway of phenol degradation	84	239	0.000125655	8.97898e-05	1.39944
Peptidase_C39_2	Peptidase_C39 like family	56	160	8.42631e-05	6.0234e-05	1.39893
Urocanase_C	Urocanase C-terminal domain	91	259	0.000136003	9.72723e-05	1.39817
DSBA	DSBA-like thioredoxin domain	312	884	0.000462708	0.0003311	1.39749
Terminase_3	Phage terminase large subunit	34	98	5.17405e-05	3.70383e-05	1.39694
Glyco_hydro_106	alpha-L-rhamnosidase	11	33	1.77396e-05	1.27202e-05	1.3946
T6SS_VasE	Bacterial Type VI secretion, VC_A0110, EvfL, ImpJ, VasE	121	345	0.000180353	0.000129447	1.39325
Fer4_18	4Fe-4S dicluster domain	80	229	0.000119742	8.60486e-05	1.39157
Ldh_2	Malate/L-lactate dehydrogenase	187	533	0.00027792	0.000199782	1.39111
T2SS_PulS_OutS	Type II secretion system pilotin lipoprotein (PulS_OutS)	37	107	5.61754e-05	4.04054e-05	1.39029
DUF2784	Protein of Unknown function (DUF2784)	18	53	2.80877e-05	2.02027e-05	1.39029
DUF2268	Predicted Zn-dependent protease (DUF2268)	25	73	3.84358e-05	2.76852e-05	1.38831
DUF1850	Domain of unknown function (DUF1850)	12	36	1.92179e-05	1.38426e-05	1.38831
FlaF	Flagellar protein FlaF	12	36	1.92179e-05	1.38426e-05	1.38831
Cofac_haem_bdg	Haem-binding uptake, Tiki superfamily, ChaN	32	93	4.87839e-05	3.51677e-05	1.38718
HlyD_D23	Barrel-sandwich domain of CusB or HlyD membrane-fusion	1040	2970	0.00153891	0.00111152	1.3845
LGFP	LGFP repeat	27	79	4.13924e-05	2.99299e-05	1.38298
BtpA	BtpA family	27	79	4.13924e-05	2.99299e-05	1.38298
Imm63	Immunity protein 63	6	19	1.03481e-05	7.48249e-06	1.38298
AAA_23	AAA domain	192	551	0.000285312	0.000206517	1.38154
DUF4440	Domain of unknown function (DUF4440)	92	265	0.000137482	9.95171e-05	1.38149
DUF2520	Domain of unknown function (DUF2520)	36	105	5.46971e-05	3.96572e-05	1.37925
Cutinase	Cutinase	59	171	8.8698e-05	6.43494e-05	1.37838
ALO	D-arabinono-1,4-lactone oxidase	29	85	4.4349e-05	3.21747e-05	1.37838
Fur_reg_FbpA	Fur-regulated basic protein A	14	42	2.21745e-05	1.60873e-05	1.37838
PQQ	PQQ enzyme repeat	116	335	0.000172961	0.000125706	1.37592
DUF2278	Uncharacterized conserved protein (DUF2278)	15	45	2.36528e-05	1.72097e-05	1.37439
SDH_sah	Serine dehydrogenase proteinase	7	22	1.18264e-05	8.60486e-06	1.37439
Peptidase_C11	Clostripain family	7	22	1.18264e-05	8.60486e-06	1.37439
DUF1330	Domain of unknown function (DUF1330)	56	163	8.42631e-05	6.13564e-05	1.37334
Glyco_hydro_2_C	Glycosyl hydrolases family 2, TIM barrel domain	138	399	0.000205484	0.00014965	1.3731
FlxA	FlxA-like protein	16	48	2.51311e-05	1.83321e-05	1.37088
DUF2063	Putative DNA-binding domain	61	178	9.16546e-05	6.69683e-05	1.36863
DUF3275	Protein of unknown function (DUF3275)	8	25	1.33047e-05	9.72723e-06	1.36778
DUF3304	Protein of unknown function (DUF3304)	36	106	5.46971e-05	4.00313e-05	1.36636
TerB	Tellurite resistance protein TerB	87	254	0.00013009	9.54017e-05	1.36361
DUF2218	Uncharacterized protein conserved in bacteria (DUF2218)	19	57	2.9566e-05	2.16992e-05	1.36254
PRC	PRC-barrel domain	102	298	0.000152265	0.000111863	1.36117
Cytochrome_C7	Cytochrome c7 and related cytochrome c	30	89	4.58273e-05	3.36712e-05	1.36102
DUF4178	Domain of unknown function (DUF4178)	20	60	3.10443e-05	2.28216e-05	1.3603
DUF4810	Domain of unknown function (DUF4810)	20	60	3.10443e-05	2.28216e-05	1.3603
RecU	Recombination protein U	43	127	6.50452e-05	4.78879e-05	1.35828
VKG_Carbox	Vitamin K-dependent gamma-carboxylase	10	31	1.62613e-05	1.1972e-05	1.35828
Glyco_tranf_2_2	Glycosyltransferase like family 2	10	31	1.62613e-05	1.1972e-05	1.35828
Cytochrom_C	Cytochrome c	302	881	0.000447925	0.000329978	1.35744
DUF2200	Uncharacterized protein conserved in bacteria (DUF2200)	22	66	3.40009e-05	2.50663e-05	1.35644
ABC_membrane_2	ABC transporter transmembrane region 2	57	168	8.57414e-05	6.3227e-05	1.35609
HTH_18	Helix-turn-helix domain	2214	6465	0.00327443	0.00241909	1.35358
YadA_stalk	Coiled stalk of trimeric autotransporter adhesin	51	151	7.68716e-05	5.68669e-05	1.35178
DUF4226	Domain of unknown function (DUF4226)	12	37	1.92179e-05	1.42167e-05	1.35178
AHSA1	Activator of Hsp90 ATPase homolog 1-like protein	231	679	0.000342965	0.000254405	1.34811
SoxZ	Sulphur oxidation protein SoxZ	14	43	2.21745e-05	1.64615e-05	1.34705
Tae4	Type VI secretion system (T6SS), amidase effector protein 4	15	46	2.36528e-05	1.75838e-05	1.34514
Abhydrolase_6	Alpha/beta hydrolase family	552	1627	0.0008175	0.000609074	1.3422
Phage_prot_Gp6	Phage portal protein, SPP1 Gp6-like	35	105	5.32188e-05	3.96572e-05	1.34197
HHH_6	Helix-hairpin-helix motif	36	108	5.46971e-05	4.07796e-05	1.34129
Peripla_BP_6	Periplasmic binding protein	689	2033	0.00102003	0.000760969	1.34043
AAA_25	AAA domain	100	297	0.000149308	0.000111489	1.33922
CRISPR_assoc	CRISPR associated protein	32	97	4.87839e-05	3.66642e-05	1.33056
Acetyltransf_7	Acetyltransferase (GNAT) domain	134	400	0.00019957	0.000150024	1.33026
Trehalose_PPase	Trehalose-phosphatase	69	207	0.000103481	7.78179e-05	1.32978
MCRA	MCRA family	36	109	5.46971e-05	4.11537e-05	1.32909
NAD_binding_10	NAD(P)H-binding	433	1291	0.000641582	0.000483369	1.32731
IclR	Bacterial transcriptional regulator	697	2086	0.00103185	0.000780798	1.32154
Flavin_Reduct	Flavin reductase like domain	372	1117	0.000551406	0.000418271	1.3183
PerC	PerC transcriptional activator	14	44	2.21745e-05	1.68356e-05	1.31712
DUF1614	Protein of unknown function (DUF1614)	3	11	5.9132e-06	4.48949e-06	1.31712
Methyltransf_12	Methyltransferase domain	30	92	4.58273e-05	3.47936e-05	1.31712
NB-ARC	NB-ARC domain	7	23	1.18264e-05	8.979e-06	1.31712
Peptidase_M43	Pregnancy-associated plasma protein-A	10	32	1.62613e-05	1.23461e-05	1.31712
YvrJ	YvrJ protein family	15	47	2.36528e-05	1.7958e-05	1.31712
Head-tail_con	Bacteriophage head to tail connecting protein	5	17	8.8698e-06	6.73424e-06	1.31712
BNR_4	BNR repeat-containing family member	4	14	7.3915e-06	5.61187e-06	1.31712
DUF4435	Protein of unknown function (DUF4435)	8	26	1.33047e-05	1.01014e-05	1.31712
PKD	PKD domain	22	68	3.40009e-05	2.58146e-05	1.31712
putAbiC	Putative phage abortive infection protein	3	11	5.9132e-06	4.48949e-06	1.31712
TED	Thioester domain	5	17	8.8698e-06	6.73424e-06	1.31712
OHCU_decarbox	OHCU decarboxylase	58	176	8.72197e-05	6.622e-05	1.31712
DUF1036	Protein of unknown function (DUF1036)	8	26	1.33047e-05	1.01014e-05	1.31712
DUF2326	Uncharacterised protein conserved in bacteria (DUF2326)	10	32	1.62613e-05	1.23461e-05	1.31712
TraI_2_C	Putative conjugal transfer nickase/helicase TraI C-term	3	11	5.9132e-06	4.48949e-06	1.31712
DUF1328	Protein of unknown function (DUF1328)	94	284	0.000140438	0.000106625	1.31712
DUF2945	Protein of unknown function (DUF2945)	8	26	1.33047e-05	1.01014e-05	1.31712
DUF2778	Protein of unknown function (DUF2778)	23	71	3.54792e-05	2.6937e-05	1.31712
Reductase_C	Reductase C-terminal	3	11	5.9132e-06	4.48949e-06	1.31712
CpeT	CpeT/CpcT family (DUF1001)	5	17	8.8698e-06	6.73424e-06	1.31712
DUF4876	Protein of unknown function (DUF4876)	3	11	5.9132e-06	4.48949e-06	1.31712
LVIVD	LVIVD repeat	10	32	1.62613e-05	1.23461e-05	1.31712
Phage_GPD	Phage late control gene D protein (GPD)	317	954	0.000470099	0.000357289	1.31574
Sugar-bind	Putative sugar-binding domain	194	586	0.000288268	0.000219611	1.31263
Cas_Cas1	CRISPR associated protein Cas1	89	271	0.000133047	0.000101762	1.30743
Arc	Arc-like DNA binding domain	30	93	4.58273e-05	3.51677e-05	1.30311
DUF3324	Protein of unknown function C-terminal (DUF3324)	26	81	3.99141e-05	3.06782e-05	1.30106
TetR_C_6	BetI-type transcriptional repressor, C-terminal	91	279	0.000136003	0.000104755	1.2983
DUF799	Putative bacterial lipoprotein (DUF799)	20	63	3.10443e-05	2.3944e-05	1.29654
Phage_antiter_Q	Phage antitermination protein Q	20	63	3.10443e-05	2.3944e-05	1.29654
DUF1214	Protein of unknown function (DUF1214)	39	121	5.9132e-05	4.56432e-05	1.29553
Tagatose_6_P_K	Tagatose 6 phosphate kinase	57	176	8.57414e-05	6.622e-05	1.2948
2OG-FeII_Oxy	2OG-Fe(II) oxygenase superfamily	17	54	2.66094e-05	2.05768e-05	1.29317
Lumazine_bd_2	Putative lumazine-binding	16	51	2.51311e-05	1.94545e-05	1.29179
Calx-beta	Calx-beta domain	13	42	2.06962e-05	1.60873e-05	1.28649
DUF2846	Protein of unknown function (DUF2846)	13	42	2.06962e-05	1.60873e-05	1.28649
AraC_N	AraC-type transcriptional regulator N-terminus	123	380	0.000183309	0.000142541	1.28601
AsnC_trans_reg	Lrp/AsnC ligand binding domain	585	1800	0.000866283	0.000673798	1.28567
Phg_2220_C	Conserved phage C-terminus (Phg_2220_C)	12	39	1.92179e-05	1.4965e-05	1.28419
IpaC_SipC	Salmonella-Shigella invasin protein C (IpaC_SipC)	12	39	1.92179e-05	1.4965e-05	1.28419
Haemagg_act	haemagglutination activity domain	112	348	0.000167048	0.000130569	1.27938
RdgC	Putative exonuclease, RdgC	77	240	0.000115307	9.0164e-05	1.27886
DUF1768	Domain of unknown function (DUF1768)	32	101	4.87839e-05	3.81607e-05	1.27838
Glyco_hydro_115	Glycosyl hydrolase family 115	9	30	1.4783e-05	1.15979e-05	1.27463
Glyco_hydro_20	Glycosyl hydrolase family 20, catalytic domain	78	244	0.000116786	9.16605e-05	1.27411
DUF4123	Domain of unknown function (DUF4123)	57	179	8.57414e-05	6.73424e-05	1.27322
Isochorismatase	Isochorismatase family	672	2088	0.000994895	0.000781546	1.27298
Phage_T4_gp19	T4-like virus tail tube protein gp19	18	58	2.80877e-05	2.20733e-05	1.27247
Ser_hydrolase	Serine hydrolase	74	232	0.000110872	8.7171e-05	1.2719
MqsR_toxin	Motility quorum-sensing regulator, toxin of MqsA	17	55	2.66094e-05	2.0951e-05	1.27008
BAAT_C	BAAT / Acyl-CoA thioester hydrolase C terminal	8	27	1.33047e-05	1.04755e-05	1.27008
Lipocalin_2	Lipocalin-like domain	85	267	0.000127134	0.000100265	1.26797
Glyco_hydro_127	Beta-L-arabinofuranosidase, GH127	48	152	7.24367e-05	5.7241e-05	1.26547
DUF3987	Protein of unknown function (DUF3987)	31	99	4.73056e-05	3.74124e-05	1.26443
DUF4303	Domain of unknown function (DUF4303)	7	24	1.18264e-05	9.35311e-06	1.26443
Couple_hipA	HipA N-terminal domain	15	49	2.36528e-05	1.87062e-05	1.26443
DUF488	Protein of unknown function, DUF488	119	374	0.000177396	0.000140297	1.26443
GNAT_acetyltran	GNAT acetyltransferase	22	71	3.40009e-05	2.6937e-05	1.26224
DUF4198	Domain of unknown function (DUF4198)	45	143	6.80018e-05	5.38739e-05	1.26224
IpaD	Invasion plasmid antigen IpaD	14	46	2.21745e-05	1.75838e-05	1.26107
Plasmid_RAQPRD	Plasmid protein of unknown function (Plasmid_RAQPRD)	14	46	2.21745e-05	1.75838e-05	1.26107
OprB	Carbohydrate-selective porin, OprB family	81	256	0.000121221	9.615e-05	1.26074
Endonuclea_NS_2	DNA/RNA non-specific endonuclease	33	106	5.02622e-05	4.00313e-05	1.25557
DnaB_C	DnaB-like helicase C terminal domain	271	856	0.000402097	0.000320625	1.25411
DUF1657	Protein of unknown function (DUF1657)	18	59	2.80877e-05	2.24475e-05	1.25126
DUF3024	Protein of unknown function (DUF3024)	5	18	8.8698e-06	7.10836e-06	1.2478
DUF3347	Protein of unknown function (DUF3347)	5	18	8.8698e-06	7.10836e-06	1.2478
DUF5309	Family of unknown function (DUF5309)	5	18	8.8698e-06	7.10836e-06	1.2478
DUF1345	Protein of unknown function (DUF1345)	28	91	4.28707e-05	3.44194e-05	1.24554
CHASE2	CHASE2 domain	50	161	7.53933e-05	6.06081e-05	1.24395
DUF2859	Protein of unknown function (DUF2859)	16	53	2.51311e-05	2.02027e-05	1.24395
BON	BON domain	229	730	0.000340009	0.000273485	1.24325
GST_C_2	Glutathione S-transferase, C-terminal domain	59	190	8.8698e-05	7.14578e-05	1.24126
DUF296	Domain of unknown function (DUF296)	37	120	5.61754e-05	4.5269e-05	1.24092
Cas_Cas6	CRISPR associated protein Cas6	15	50	2.36528e-05	1.90803e-05	1.23964
TetR_N	Bacterial regulatory proteins, tetR family	2270	7245	0.00335722	0.00271091	1.23841
PAPS_reduct	Phosphoadenosine phosphosulfate reductase family	264	846	0.000391749	0.000316883	1.23626
DUF2783	Protein of unknown function (DUF2783)	19	63	2.9566e-05	2.3944e-05	1.2348
DUF3649	Protein of unknown function (DUF3649)	4	15	7.3915e-06	5.986e-06	1.2348
DUF3088	Protein of unknown function (DUF3088)	9	31	1.4783e-05	1.1972e-05	1.2348
Imm61	Immunity protein 61	4	15	7.3915e-06	5.986e-06	1.2348
T6SS_TssF	Type VI secretion system, TssF	131	422	0.000195135	0.000158255	1.23305
dCache_1	Cache domain	86	278	0.000128612	0.000104381	1.23214
Methyltransf_2	O-methyltransferase	57	185	8.57414e-05	6.95871e-05	1.23214
Amidohydro_3	Amidohydrolase family	509	1637	0.000753933	0.000612816	1.23028
Excalibur	Excalibur calcium-binding domain	27	89	4.13924e-05	3.36712e-05	1.22931
Spore_permease	Spore germination protein	92	298	0.000137482	0.000111863	1.22902
EAL	EAL domain	1355	4361	0.00200457	0.00163193	1.22835
DUF1883	Domain of unknown function (DUF1883)	8	28	1.33047e-05	1.08496e-05	1.22628
DUF2875	Protein of unknown function (DUF2875)	8	28	1.33047e-05	1.08496e-05	1.22628
Ureidogly_lyase	Ureidoglycolate lyase	60	196	9.01763e-05	7.37025e-05	1.22352
Rotamase_2	PPIC-type PPIASE domain	51	167	7.68716e-05	6.28529e-05	1.22304
TPR_10	Tetratricopeptide repeat	12	41	1.92179e-05	1.57132e-05	1.22304
Hydrolase_2	Cell Wall Hydrolase	67	219	0.000100524	8.23074e-05	1.22133
DUF2895	Protein of unknown function (DUF2895)	16	54	2.51311e-05	2.05768e-05	1.22133
Bac_transf	Bacterial sugar transferase	288	934	0.000427228	0.000349806	1.22133
PadR	Transcriptional regulator PadR-like family	305	991	0.00045236	0.000371131	1.21887
Metal_resist	Heavy-metal resistance	44	145	6.65235e-05	5.46222e-05	1.21788
Phage_portal	Phage portal protein	120	392	0.000178874	0.000147031	1.21658
DUF4297	Domain of unknown function (DUF4297)	7	25	1.18264e-05	9.72723e-06	1.2158
GvpO	Gas vesicle synthesis protein GvpO	3	12	5.9132e-06	4.86362e-06	1.2158
CHASE5	Periplasmic sensor domain found in signal transduction proteins	3	12	5.9132e-06	4.86362e-06	1.2158
DUF3473	Domain of unknown function (DUF3473)	7	25	1.18264e-05	9.72723e-06	1.2158
NAGidase	beta-N-acetylglucosaminidase	7	25	1.18264e-05	9.72723e-06	1.2158
Fe_dep_repress	Iron dependent repressor, N-terminal DNA binding domain	27	90	4.13924e-05	3.40453e-05	1.2158
DUF4116	Domain of unknown function (DUF4116)	3	12	5.9132e-06	4.86362e-06	1.2158
NapD	NapD protein	43	142	6.50452e-05	5.34998e-05	1.2158
TPR_17	Tetratricopeptide repeat	11	38	1.77396e-05	1.45909e-05	1.2158
COX4_pro	Prokaryotic Cytochrome C oxidase subunit IV	137	448	0.000204005	0.000167982	1.21445
TolA	TolA C-terminal	54	178	8.13065e-05	6.69683e-05	1.2141
T2SSJ	Type II secretion system (T2SS), protein J	37	123	5.61754e-05	4.63914e-05	1.2109
ABC2_membrane_4	ABC-2 family transporter protein	78	257	0.000116786	9.65241e-05	1.20991
DUF4880	Domain of unknown function (DUF4880)	25	84	3.84358e-05	3.18006e-05	1.20865
FGE-sulfatase	Sulfatase-modifying factor enzyme 1	195	640	0.000289747	0.000239814	1.20822
Terminase_1	Phage Terminase	76	251	0.000113829	9.42793e-05	1.20736
Cytochrom_B562	Cytochrome b562	43	143	6.50452e-05	5.38739e-05	1.20736
SURF1	SURF1 family	82	271	0.000122699	0.000101762	1.20575
NicO	High-affinity nickel-transport protein	125	412	0.000186266	0.000154513	1.2055
Peptidase_S49	Peptidase family S49	189	622	0.000280877	0.00023308	1.20507
AAA_14	AAA domain	42	140	6.35669e-05	5.27515e-05	1.20502
Aldedh	Aldehyde dehydrogenase family	2153	7073	0.00318426	0.00264656	1.20317
BOF	Bacterial OB fold (BOF) protein	83	275	0.000124177	0.000103258	1.20259
AAA_12	AAA domain	62	206	9.31329e-05	7.74437e-05	1.20259
GramPos_pilinD1	Gram-positive pilin subunit D1, N-terminal	6	22	1.03481e-05	8.60486e-06	1.20259
Peptidase_C93	Bacterial transglutaminase-like cysteine proteinase BTLCP	30	101	4.58273e-05	3.81607e-05	1.2009
PhnG	Phosphonate metabolism protein PhnG	39	131	5.9132e-05	4.93844e-05	1.19738
HATPase_c_3	Histidine kinase-, DNA gyrase B-, and HSP90-like ATPase	49	164	7.3915e-05	6.17305e-05	1.19738
HATPase_c_4	Putative ATP-dependent DNA helicase recG C-terminal	29	98	4.4349e-05	3.70383e-05	1.19738
PhyH	Phytanoyl-CoA dioxygenase (PhyH)	112	372	0.000167048	0.000139548	1.19706
2CSK_N	Two-component sensor kinase N-terminal	82	273	0.000122699	0.00010251	1.19694
COX_ARM	COX Aromatic Rich Motif	85	283	0.000127134	0.000106251	1.19654
ADH_zinc_N	Zinc-binding dehydrogenase	743	2463	0.00109985	0.000921842	1.1931
Phage_int_SAM_2	Phage integrase, N-terminal	15	52	2.36528e-05	1.98286e-05	1.19286
ABC_tran	ABC transporter	12338	40875	0.0182407	0.0152927	1.19277
Abhydrolase_1	alpha/beta hydrolase fold	1477	4897	0.00218493	0.00183246	1.19235
Big_3_5	Bacterial Ig-like domain (group 3)	18	62	2.80877e-05	2.35698e-05	1.19168
RtcR	Regulator of RNA terminal phosphate cyclase	21	72	3.25226e-05	2.73111e-05	1.19082
Peptidase_S15	X-Pro dipeptidyl-peptidase (S15 family)	114	381	0.000170004	0.000142916	1.18954
DUF3520	Domain of unknown function (DUF3520)	33	112	5.02622e-05	4.22761e-05	1.1889
CarboxypepD_reg	Carboxypeptidase regulatory-like domain	85	285	0.000127134	0.000107	1.18817
GerE	Bacterial regulatory proteins, luxR family	821	2733	0.00121516	0.00102286	1.18801
Cytochrome_CBB3	Cytochrome C oxidase, cbb3-type, subunit III	299	998	0.00044349	0.00037375	1.18659
ImpE	ImpE protein	20	69	3.10443e-05	2.61887e-05	1.18541
DUF2312	Uncharacterized protein conserved in bacteria (DUF2312)	20	69	3.10443e-05	2.61887e-05	1.18541
DUF4019	Protein of unknown function (DUF4019)	8	29	1.33047e-05	1.12237e-05	1.18541
PT-HINT	Pretoxin HINT domain	11	39	1.77396e-05	1.4965e-05	1.18541
PYNP_C	Pyrimidine nucleoside phosphorylase C-terminal domain	14	49	2.21745e-05	1.87062e-05	1.18541
DUF4865	Domain of unknown function (DUF4865)	11	39	1.77396e-05	1.4965e-05	1.18541
DUF1400	Alpha/beta hydrolase of unknown function (DUF1400)	5	19	8.8698e-06	7.48249e-06	1.18541
DUF1956	Domain of unknown function (DUF1956)	41	139	6.20886e-05	5.23774e-05	1.18541
DUF2263	Uncharacterized protein conserved in bacteria (DUF2263)	5	19	8.8698e-06	7.48249e-06	1.18541
PaaA_PaaC	Phenylacetic acid catabolic protein	110	369	0.000164091	0.000138426	1.18541
PhnH	Bacterial phosphonate metabolism protein (PhnH)	40	136	6.06103e-05	5.1255e-05	1.18252
DUF624	Protein of unknown function, DUF624	34	116	5.17405e-05	4.37726e-05	1.18203
Usp	Universal stress protein family	747	2500	0.00110577	0.000935685	1.18177
Transthyretin	HIUase/Transthyretin family	83	280	0.000124177	0.000105129	1.18119
ATP-grasp_5	ATP-grasp domain	103	347	0.000153743	0.000130195	1.18087
bPH_3	Bacterial PH domain	19	66	2.9566e-05	2.50663e-05	1.17951
YcgR_2	Flagellar protein YcgR	19	66	2.9566e-05	2.50663e-05	1.17951
Glyco_transf_20	Glycosyltransferase family 20	86	291	0.000128612	0.000109244	1.17729
DUF3262	Protein of unknown function (DUF3262)	13	46	2.06962e-05	1.75838e-05	1.177
DUF3139	Protein of unknown function (DUF3139)	13	46	2.06962e-05	1.75838e-05	1.177
HxlR	HxlR-like helix-turn-helix	448	1507	0.000663756	0.00056418	1.1765
SBP_bac_3	Bacterial extracellular solute-binding proteins, family 3	1482	4984	0.00219232	0.00186501	1.1755
HIPIP	High potential iron-sulfur protein	10	36	1.62613e-05	1.38426e-05	1.17473
PhnJ	Phosphonate metabolism protein PhnJ	40	137	6.06103e-05	5.16292e-05	1.17395
FHA	FHA domain	100	339	0.000149308	0.000127202	1.17379
DUF1904	Domain of unknown function (DUF1904)	7	26	1.18264e-05	1.01014e-05	1.17077
Glyco_hydro_12	Glycosyl hydrolase family 12	7	26	1.18264e-05	1.01014e-05	1.17077
Dodecin	Dodecin	46	158	6.94801e-05	5.94858e-05	1.16801
Secretin	Bacterial type II and III secretion system protein	312	1058	0.000462708	0.000396198	1.16787
DUF1449	Protein of unknown function (DUF1449)	25	87	3.84358e-05	3.29229e-05	1.16745
ESX-1_EspG	EspG family	27	94	4.13924e-05	3.55418e-05	1.16461
DUF1993	Domain of unknown function (DUF1993)	32	111	4.87839e-05	4.19019e-05	1.16424
K_trans	K+ potassium transporter	117	400	0.000174439	0.000150024	1.16274
Peptidase_C10	Peptidase C10 family	4	16	7.3915e-06	6.36011e-06	1.16216
Gly_reductase	Glycine/sarcosine/betaine reductase component B subunits	4	16	7.3915e-06	6.36011e-06	1.16216
GrlR	T3SS negative regulator,GrlR	4	16	7.3915e-06	6.36011e-06	1.16216
SCPU	Spore Coat Protein U domain	82	282	0.000122699	0.000105877	1.15888
GCV_T	Aminomethyltransferase folate-binding domain	266	911	0.000394706	0.000341201	1.15681
Peptidase_C39	Peptidase C39 family	65	225	9.75678e-05	8.45521e-05	1.15394
CblD	CblD like pilus biogenesis initiator	6	23	1.03481e-05	8.979e-06	1.15248
DUF3577	Protein of unknown function (DUF3577)	13	47	2.06962e-05	1.7958e-05	1.15248
DUF563	Protein of unknown function (DUF563)	13	47	2.06962e-05	1.7958e-05	1.15248
Glyco_hydro_38	Glycosyl hydrolases family 38 N-terminal domain	50	174	7.53933e-05	6.54718e-05	1.15154
DUF2892	Protein of unknown function (DUF2892)	47	164	7.09584e-05	6.17305e-05	1.14949
DUF4255	Protein of unknown function (DUF4255)	8	30	1.33047e-05	1.15979e-05	1.14717
DUF1987	Domain of unknown function (DUF1987)	8	30	1.33047e-05	1.15979e-05	1.14717
DUF1599	Domain of Unknown Function (DUF1599)	8	30	1.33047e-05	1.15979e-05	1.14717
Mu-like_gpT	Mu-like prophage major head subunit gpT	8	30	1.33047e-05	1.15979e-05	1.14717
Glyco_hydro_25	Glycosyl hydrolases family 25	89	309	0.000133047	0.000115979	1.14717
DUF1275	Protein of unknown function (DUF1275)	93	323	0.00013896	0.000121216	1.14638
GrpB	GrpB protein	59	206	8.8698e-05	7.74437e-05	1.14532
Zn_Tnp_IS1595	Transposase zinc-ribbon domain	10	37	1.62613e-05	1.42167e-05	1.14381
EntA_Immun	Enterocin A Immunity	21	75	3.25226e-05	2.84335e-05	1.14381
Tannase	Tannase and feruloyl esterase	23	82	3.54792e-05	3.10523e-05	1.14256
CCP_MauG	Di-haem cytochrome c peroxidase	108	376	0.000161135	0.000141045	1.14244
DUF4229	Protein of unknown function (DUF4229)	12	44	1.92179e-05	1.68356e-05	1.1415
LysR_substrate	LysR substrate binding domain	5204	18042	0.00769455	0.00675033	1.13988
DUF3487	Protein of unknown function (DUF3487)	14	51	2.21745e-05	1.94545e-05	1.13981
Epimerase	NAD dependent epimerase/dehydratase family	981	3404	0.00145169	0.00127389	1.13957
Thioesterase	Thioesterase domain	120	420	0.000178874	0.000157506	1.13566
Capsule_synth	Capsule polysaccharide biosynthesis protein	74	260	0.000110872	9.76465e-05	1.13545
OEP	Outer membrane efflux protein	927	3230	0.00137186	0.0012088	1.1349
MM_CoA_mutase	Methylmalonyl-CoA mutase	106	372	0.000158178	0.000139548	1.1335
CheB_methylest	CheB methylesterase	181	634	0.000269051	0.000237569	1.13252
GSDH	Glucose / Sorbosone dehydrogenase	163	572	0.000242441	0.000214373	1.13093
MarR_2	MarR family	367	1285	0.000544014	0.000481124	1.13072
DUF2357	Domain of unknown function (DUF2357)	5	20	8.8698e-06	7.85661e-06	1.12896
BCHF	2-vinyl bacteriochlorophyllide hydratase (BCHF)	3	13	5.9132e-06	5.23774e-06	1.12896
DUF4336	Domain of unknown function (DUF4336)	7	27	1.18264e-05	1.04755e-05	1.12896
DUF3438	Protein of unknown function (DUF3438)	15	55	2.36528e-05	2.0951e-05	1.12896
Mo-nitro_C	Mo-dependent nitrogenase C-terminus	5	20	8.8698e-06	7.85661e-06	1.12896
DUF4864	Domain of unknown function (DUF4864)	5	20	8.8698e-06	7.85661e-06	1.12896
Z1	Z1 domain	7	27	1.18264e-05	1.04755e-05	1.12896
HEAT_2	HEAT repeats	89	314	0.000133047	0.000117849	1.12896
Phage_holin_3_3	LydA holin phage, holin superfamily III	23	83	3.54792e-05	3.14264e-05	1.12896
DUF3346	Protein of unknown function (DUF3346)	3	13	5.9132e-06	5.23774e-06	1.12896
NAD_binding_4	Male sterility protein	47	167	7.09584e-05	6.28529e-05	1.12896
HTH_Tnp_4	Helix-turn-helix of DDE superfamily endonuclease	31	111	4.73056e-05	4.19019e-05	1.12896
DndE	DNA sulphur modification protein DndE	3	13	5.9132e-06	5.23774e-06	1.12896
FtsH_ext	FtsH Extracellular	7	27	1.18264e-05	1.04755e-05	1.12896
Lipase_GDSL_3	GDSL-like Lipase/Acylhydrolase family	7	27	1.18264e-05	1.04755e-05	1.12896
Glyco_hydro_68	Levansucrase/Invertase	17	62	2.66094e-05	2.35698e-05	1.12896
Peptidase_M13	Peptidase family M13	17	62	2.66094e-05	2.35698e-05	1.12896
IcmF_C	Type VI secretion protein IcmF C-terminal	21	76	3.25226e-05	2.88076e-05	1.12896
DUF3799	PDDEXK-like domain of unknown function (DUF3799)	13	48	2.06962e-05	1.83321e-05	1.12896
HutD	HutD	55	195	8.27848e-05	7.33284e-05	1.12896
UPF0149	Uncharacterised protein family (UPF0149)	111	391	0.000165569	0.000146657	1.12896
PaaB	Phenylacetic acid degradation B	50	178	7.53933e-05	6.69683e-05	1.12581
COX3	Cytochrome c oxidase subunit III	203	715	0.000301573	0.000267873	1.12581
Na_H_antiport_1	Na+/H+ antiporter 1	93	329	0.00013896	0.000123461	1.12554
PhageMin_Tail	Phage-related minor tail protein	89	315	0.000133047	0.000118223	1.12539
DUF1348	Protein of unknown function (DUF1348)	44	157	6.65235e-05	5.91116e-05	1.12539
GntR	Bacterial regulatory proteins, gntR family	601	2117	0.000889936	0.000792395	1.1231
UPF0236	Uncharacterised protein family (UPF0236)	26	94	3.99141e-05	3.55418e-05	1.12302
CHAP	CHAP domain	77	274	0.000115307	0.000102884	1.12075
Cpn10	Chaperonin 10 Kd subunit	194	687	0.000288268	0.000257398	1.11993
NucS	Endonuclease NucS	16	59	2.51311e-05	2.24475e-05	1.11955
TPR_8	Tetratricopeptide repeat	14	52	2.21745e-05	1.98286e-05	1.11831
FhuF	Ferric iron reductase FhuF-like transporter	44	158	6.65235e-05	5.94858e-05	1.11831
DUF3300	Protein of unknown function (DUF3300)	44	158	6.65235e-05	5.94858e-05	1.11831
MaoC_dehydratas	MaoC like domain	295	1045	0.000437577	0.000391334	1.11817
UDPGT	UDP-glucoronosyl and UDP-glucosyl transferase	42	151	6.35669e-05	5.68669e-05	1.11782
Sacchrp_dh_NADP	Saccharopine dehydrogenase NADP binding domain	83	296	0.000124177	0.000111115	1.11756
Arabinose_bd	Arabinose-binding domain of AraC transcription regulator, N-term	165	586	0.000245398	0.000219611	1.11742
PhnI	Bacterial phosphonate metabolism protein (PhnI)	40	144	6.06103e-05	5.4248e-05	1.11728
DoxX	DoxX	272	965	0.000403576	0.000361404	1.11669
T6SS-SciN	Type VI secretion lipoprotein, VasD, EvfM, TssJ, VC_A0113	78	279	0.000116786	0.000104755	1.11485
LMWPc	Low molecular weight phosphotyrosine protein phosphatase	281	999	0.00041688	0.000374124	1.11428
ResIII	Type III restriction enzyme, res subunit	318	1131	0.000471577	0.000423509	1.1135
SUKH_5	SMI1-KNR4 cell-wall	19	70	2.9566e-05	2.65628e-05	1.11306
Mut7-C	Mut7-C RNAse domain	17	63	2.66094e-05	2.3944e-05	1.11132
HTH_AsnC-type	AsnC-type helix-turn-helix domain	97	348	0.000144873	0.000130569	1.10955
T2SSL	Type II secretion system (T2SS), protein L	38	138	5.76537e-05	5.20033e-05	1.10865
Thioredoxin_3	Thioredoxin domain	20	74	3.10443e-05	2.80593e-05	1.10638
Toprim	Toprim domain	20	74	3.10443e-05	2.80593e-05	1.10638
DUF1942	Domain of unknown function (DUF1942)	6	24	1.03481e-05	9.35311e-06	1.10638
HsdM_N	HsdM N-terminal domain	13	49	2.06962e-05	1.87062e-05	1.10638
AstE_AspA	Succinylglutamate desuccinylase / Aspartoacylase family	162	583	0.000240963	0.000218489	1.10286
DUF692	Protein of unknown function (DUF692)	64	232	9.60895e-05	8.7171e-05	1.10231
HNH_5	HNH endonuclease	43	157	6.50452e-05	5.91116e-05	1.10038
Bac_DNA_binding	Bacterial DNA-binding protein	460	1658	0.000681496	0.000620672	1.098
MASE3	Membrane-associated sensor domain	4	17	7.3915e-06	6.73424e-06	1.0976
Ykof	YKOF-related Family	4	17	7.3915e-06	6.73424e-06	1.0976
DUF4188	Domain of unknown function (DUF4188)	4	17	7.3915e-06	6.73424e-06	1.0976
CdiI	CDI immunity protein	4	17	7.3915e-06	6.73424e-06	1.0976
TcdB_toxin_midN	Insecticide toxin TcdB middle/N-terminal region	4	17	7.3915e-06	6.73424e-06	1.0976
Cas_CT1975	CT1975-like protein	29	107	4.4349e-05	4.04054e-05	1.0976
SIP	Siderophore-interacting protein	57	208	8.57414e-05	7.8192e-05	1.09655
DsbC	Disulphide bond corrector protein DsbC	114	414	0.000170004	0.000155262	1.09495
CT_A_B	Carboxyltransferase domain, subdomain A and B	148	537	0.000220267	0.000201279	1.09434
DUF1445	Protein of unknown function (DUF1445)	30	111	4.58273e-05	4.19019e-05	1.09368
CRISPR_Cse2	CRISPR-associated protein Cse2 (CRISPR_cse2)	25	93	3.84358e-05	3.51677e-05	1.09293
MCPsignal	Methyl-accepting chemotaxis protein (MCP) signalling domain	1296	4690	0.00191735	0.00175502	1.0925
Flp_Fap	Flp/Fap pilin component	49	180	7.3915e-05	6.77165e-05	1.09154
Cpn60_TCP1	TCP-1/cpn60 chaperonin family	231	839	0.000342965	0.000314264	1.09133
Wzy_C	O-Antigen ligase	160	582	0.000238006	0.000218115	1.0912
HpcH_HpaI	HpcH/HpaI aldolase/citrate lyase family	300	1090	0.000444968	0.00040817	1.09015
zinc_ribbon_2	zinc-ribbon domain	7	28	1.18264e-05	1.08496e-05	1.09003
DUF2390	Protein of unknown function (DUF2390)	15	57	2.36528e-05	2.16992e-05	1.09003
SpoIIID	Stage III sporulation protein D	15	57	2.36528e-05	2.16992e-05	1.09003
KdpC	K+-transporting ATPase, c chain	96	351	0.000143395	0.000131692	1.08887
AFOR_C	Aldehyde ferredoxin oxidoreductase, domains 2 & 3	18	68	2.80877e-05	2.58146e-05	1.08806
DUF4432	Domain of unknown function (DUF4432)	29	108	4.4349e-05	4.07796e-05	1.08753
GLF	UDP-galactopyranose mutase	43	159	6.50452e-05	5.98599e-05	1.08662
Sortilin-Vps10	Sortilin, neurotensin receptor 3,	43	159	6.50452e-05	5.98599e-05	1.08662
DUF418	Protein of unknown function (DUF418)	76	279	0.000113829	0.000104755	1.08662
Cation_efflux	Cation efflux family	385	1405	0.000570623	0.000526019	1.0848
DUF2543	Protein of unknown function (DUF2543)	13	50	2.06962e-05	1.90803e-05	1.08469
PdxA	Pyridoxal phosphate biosynthetic protein PdxA	145	531	0.000215832	0.000199034	1.0844
UvrD-helicase	UvrD/REP helicase N-terminal domain	521	1902	0.000771672	0.000711959	1.08387
ACR_tran	AcrB/AcrD/AcrF family	1106	4035	0.00163648	0.00150997	1.08378
Pantoate_transf	Ketopantoate hydroxymethyltransferase	143	525	0.000212875	0.000196789	1.08174
DUF521	Protein of unknown function (DUF521)	31	116	4.73056e-05	4.37726e-05	1.08071
Oxidored_FMN	NADH:flavin oxidoreductase / NADH oxidase family	468	1714	0.000693322	0.000641623	1.08058
Bac_export_3	Bacterial export proteins, family 3	157	577	0.000233571	0.000216244	1.08013
fn3	Fibronectin type III domain	17	65	2.66094e-05	2.46922e-05	1.07764
DUF3238	Protein of unknown function (DUF3238)	2	10	4.4349e-06	4.11537e-06	1.07764
DUF1574	Protein of unknown function (DUF1574)	2	10	4.4349e-06	4.11537e-06	1.07764
DUF3937	Protein of unknown function (DUF3937)	2	10	4.4349e-06	4.11537e-06	1.07764
DrsE_2	DsrE/DsrF/DrsH-like family	26	98	3.99141e-05	3.70383e-05	1.07764
TPR_7	Tetratricopeptide repeat	2	10	4.4349e-06	4.11537e-06	1.07764
YjcQ	YjcQ protein	2	10	4.4349e-06	4.11537e-06	1.07764
DUF2199	Uncharacterized protein conserved in bacteria (DUF2199)	5	21	8.8698e-06	8.23074e-06	1.07764
HicB-like_2	HicB_like antitoxin of bacterial toxin-antitoxin system	2	10	4.4349e-06	4.11537e-06	1.07764
CBP_BcsS	Cellulose biosynthesis protein BcsS	2	10	4.4349e-06	4.11537e-06	1.07764
NKWYS	Putative capsular polysaccharide synthesis protein	2	10	4.4349e-06	4.11537e-06	1.07764
DUF4494	Domain of unknown function (DUF4494)	2	10	4.4349e-06	4.11537e-06	1.07764
Phage_tail_APC	Phage tail assembly chaperone protein	2	10	4.4349e-06	4.11537e-06	1.07764
DUF1525	Protein of unknown function (DUF1525)	11	43	1.77396e-05	1.64615e-05	1.07764
DUF3613	Protein of unknown function (DUF3613)	11	43	1.77396e-05	1.64615e-05	1.07764
DUF1851	Domain of unknown function (DUF1851)	2	10	4.4349e-06	4.11537e-06	1.07764
Oxidored_molyb	Oxidoreductase molybdopterin binding domain	154	568	0.000229136	0.000212877	1.07638
adh_short	short chain dehydrogenase	1804	6636	0.00266833	0.00248306	1.07461
DUF389	Domain of unknown function (DUF389)	18	69	2.80877e-05	2.61887e-05	1.07251
GerA	Bacillus/Clostridium GerA spore germination protein	94	349	0.000140438	0.000130943	1.07251
Acyl_transf_3	Acyltransferase family	461	1703	0.000682974	0.000637508	1.07132
FA_desaturase	Fatty acid desaturase	234	867	0.0003474	0.00032474	1.06978
2-Hacid_dh_C	D-isomer specific 2-hydroxyacid dehydrogenase, NAD binding domain	730	2700	0.00108064	0.00101051	1.0694
RsbRD_N	RsbT co-antagonist protein rsbRD N-terminal domain	9	36	1.4783e-05	1.38426e-05	1.06793
DUF4298	Domain of unknown function (DUF4298)	9	36	1.4783e-05	1.38426e-05	1.06793
PG_binding_1	Putative peptidoglycan binding domain	59	221	8.8698e-05	8.30556e-05	1.06793
Pectate_lyase22	Oligogalacturonate lyase	9	36	1.4783e-05	1.38426e-05	1.06793
YscJ_FliF	Secretory protein of YscJ/FliF family	157	584	0.000233571	0.000218863	1.0672
DUF3290	Protein of unknown function (DUF3290)	6	25	1.03481e-05	9.72723e-06	1.06383
DUF3102	Protein of unknown function (DUF3102)	6	25	1.03481e-05	9.72723e-06	1.06383
DUF108	Domain of unknown function DUF108	27	103	4.13924e-05	3.89089e-05	1.06383
DUF4282	Domain of unknown function (DUF4282)	6	25	1.03481e-05	9.72723e-06	1.06383
UPF0715	Uncharacterised protein family (UPF0715)	6	25	1.03481e-05	9.72723e-06	1.06383
Cas_Cas2CT1978	CRISPR-associated protein (Cas_Cas2CT1978)	24	92	3.69575e-05	3.47936e-05	1.06219
Phage_holin_3_6	Putative Actinobacterial Holin-X, holin superfamily III	78	293	0.000116786	0.000109993	1.06176
DUF2345	Uncharacterized protein conserved in bacteria (DUF2345)	21	81	3.25226e-05	3.06782e-05	1.06012
OpuAC	Substrate binding domain of ABC-type glycine betaine transport system	322	1203	0.000477491	0.000450446	1.06004
Glyco_trans_1_4	Glycosyl transferases group 1	187	700	0.00027792	0.000262261	1.05971
Sipho_tail	Phage tail protein	41	156	6.20886e-05	5.87375e-05	1.05705
HNH_3	HNH endonuclease	26	100	3.99141e-05	3.77866e-05	1.0563
APS_kinase	Adenylylsulphate kinase	109	411	0.000162613	0.000154139	1.05497
Glycos_transf_1	Glycosyl transferases group 1	1034	3879	0.00153004	0.0014516	1.05403
Colicin_immun	Bacterial self-protective colicin-like immunity	3	14	5.9132e-06	5.61187e-06	1.0537
DUF4868	Domain of unknown function (DUF4868)	3	14	5.9132e-06	5.61187e-06	1.0537
DUF3323	Protein of unknown function N-terminus (DUF3323)	3	14	5.9132e-06	5.61187e-06	1.0537
PriCT_2	Primase C terminal 2 (PriCT-2)	3	14	5.9132e-06	5.61187e-06	1.0537
DUF3775	Protein of unknown function (DUF3775)	3	14	5.9132e-06	5.61187e-06	1.0537
GTP_CH_N	GTP cyclohydrolase N terminal	3	14	5.9132e-06	5.61187e-06	1.0537
FcoT	FcoT-like thioesterase domain	3	14	5.9132e-06	5.61187e-06	1.0537
DHHW	DHHW protein	3	14	5.9132e-06	5.61187e-06	1.0537
Gluconate_2-dh3	Gluconate 2-dehydrogenase subunit 3	39	149	5.9132e-05	5.61187e-05	1.0537
PIN_4	PIN domain	7	29	1.18264e-05	1.12237e-05	1.0537
FAA_hydrolase	Fumarylacetoacetate (FAA) hydrolase family	397	1494	0.000588363	0.000559316	1.05193
ABM	Antibiotic biosynthesis monooxygenase	310	1168	0.000459751	0.000437351	1.05122
HTH_Tnp_IS630	Transposase	49	187	7.3915e-05	7.03354e-05	1.05089
Abhydrolase_3	alpha/beta hydrolase fold	396	1492	0.000586885	0.000558568	1.0507
DUF4130	Domain of unknown function (DUF4130	20	78	3.10443e-05	2.95558e-05	1.05036
HTH_1	Bacterial regulatory helix-turn-helix protein, lysR family	767	2889	0.00113533	0.00108122	1.05005
Glyco_hydro_6	Glycosyl hydrolases family 6	16	63	2.51311e-05	2.3944e-05	1.04958
Tim44	Tim44-like domain	50	191	7.53933e-05	7.18319e-05	1.04958
FIST	FIST N domain	34	131	5.17405e-05	4.93844e-05	1.04771
TPR_2	Tetratricopeptide repeat	266	1006	0.000394706	0.000376743	1.04768
T6SS_HCP	Type VI secretion system effector, Hcp	149	565	0.000221745	0.000211754	1.04718
DDE_Tnp_1_6	Transposase DDE domain	156	592	0.000232093	0.000221856	1.04614
CPT	Chloramphenicol phosphotransferase-like protein	8	33	1.33047e-05	1.27202e-05	1.04595
NEAT	Iron Transport-associated domain	35	135	5.32188e-05	5.08809e-05	1.04595
DUF4065	Protein of unknown function (DUF4065)	26	101	3.99141e-05	3.81607e-05	1.04595
Spore_GerAC	Spore germination B3/ GerAC like, C-terminal	71	271	0.000106438	0.000101762	1.04595
DUF871	Bacterial protein of unknown function (DUF871)	40	154	6.06103e-05	5.79893e-05	1.0452
DUF190	Uncharacterized ACR, COG1993	22	86	3.40009e-05	3.25488e-05	1.04461
Kelch_1	Kelch motif	13	52	2.06962e-05	1.98286e-05	1.04375
SCO1-SenC	SCO1/SenC	123	469	0.000183309	0.000175839	1.04249
DUF3992	Protein of unknown function (DUF3992)	4	18	7.3915e-06	7.10836e-06	1.03983
SLAP	SLAP domain	4	18	7.3915e-06	7.10836e-06	1.03983
Glug	The GLUG motif	9	37	1.4783e-05	1.42167e-05	1.03983
DUF4251	Domain of unknown function (DUF4251)	4	18	7.3915e-06	7.10836e-06	1.03983
DUF2510	Protein of unknown function (DUF2510)	9	37	1.4783e-05	1.42167e-05	1.03983
HD_3	HD domain	69	265	0.000103481	9.95171e-05	1.03983
DUF3599	Domain of unknown function (DUF3599)	4	18	7.3915e-06	7.10836e-06	1.03983
DHC	Dihaem cytochrome c	4	18	7.3915e-06	7.10836e-06	1.03983
DUF350	Domain of Unknown Function (DUF350)	54	208	8.13065e-05	7.8192e-05	1.03983
Aspzincin_M35	Lysine-specific metallo-endopeptidase	4	18	7.3915e-06	7.10836e-06	1.03983
ThiG	Thiazole biosynthesis protein ThiG	116	444	0.000172961	0.000166485	1.0389
cNMP_binding	Cyclic nucleotide-binding domain	347	1324	0.000514448	0.000495715	1.03779
CoA_trans	Coenzyme A transferase	356	1359	0.000527753	0.000508809	1.03723
DUF421	Protein of unknown function (DUF421)	117	449	0.000174439	0.000168356	1.03613
FMN_bind_2	Putative FMN-binding domain	58	225	8.72197e-05	8.45521e-05	1.03155
T2SSC	Type II secretion system protein C	35	137	5.32188e-05	5.16292e-05	1.03079
Csm2_III-A	Csm2 Type III-A	5	22	8.8698e-06	8.60486e-06	1.03079
DUF4337	Domain of unknown function (DUF4337)	5	22	8.8698e-06	8.60486e-06	1.03079
PT-VENN	Pre-toxin domain with VENN motif	11	45	1.77396e-05	1.72097e-05	1.03079
DUF1849	Domain of unknown function (DUF1849)	5	22	8.8698e-06	8.60486e-06	1.03079
SpoOE-like	Spo0E like sporulation regulatory protein	42	164	6.35669e-05	6.17305e-05	1.02975
dTDP_sugar_isom	dTDP-4-dehydrorhamnose 3,5-epimerase	122	471	0.000181831	0.000176587	1.0297
FliP	FliP family	154	595	0.000229136	0.000222978	1.02762
DUF2170	Uncharacterized protein conserved in bacteria (DUF2170)	25	99	3.84358e-05	3.74124e-05	1.02735
TPR_1	Tetratricopeptide repeat	127	492	0.000189222	0.000184443	1.02591
Lactamase_B	Metallo-beta-lactamase superfamily	774	2986	0.00114568	0.00111751	1.02521
YebF	YebF-like protein	20	80	3.10443e-05	3.03041e-05	1.02443
HmuY	HmuY protein	6	26	1.03481e-05	1.01014e-05	1.02443
Glyco_hydro_85	Glycosyl hydrolase family 85	6	26	1.03481e-05	1.01014e-05	1.02443
TetR_C_11	Bacterial transcriptional repressor C-terminal	62	242	9.31329e-05	9.09122e-05	1.02443
Tubulin_2	Tubulin like	6	26	1.03481e-05	1.01014e-05	1.02443
SBF	Sodium Bile acid symporter family	158	613	0.00023505	0.000229712	1.02323
Uma2	Putative restriction endonuclease	101	393	0.000150787	0.000147405	1.02294
Glyco_hydro_42	Beta-galactosidase	45	177	6.80018e-05	6.65941e-05	1.02114
LRAT	Lecithin retinol acyltransferase	7	30	1.18264e-05	1.15979e-05	1.01971
MauE	Methylamine utilisation protein MauE	7	30	1.18264e-05	1.15979e-05	1.01971
Glyco_hydro_36	Glycosyl hydrolase 36 superfamily, catalytic domain	23	92	3.54792e-05	3.47936e-05	1.01971
[truncated: 5,044 more rows]
