# Supplementary material for: Plasmid detection and assembly in genomic and metagenomic data sets
Source: HighWire-hosted journal article supplement (doi:10.1101/gr.241299.118), 2019-05-02
Supplement: Supplemental_Table_S9.docx [file Supplemental_Table_S9.docx]

| dataset | #contigs | #plasmidic contigs  identified by plasmidVerify | #plasmidic contigs identified by cBar |
| --- | --- | --- | --- |
| INFANT | 141,027 | 2,713 (1.9%) | 58,860 (41%) |
| CROHN | 578,442 | 5,128 (0.8%) | 251,568 (43%) |
| PLASMIDOME | 33,141 | 649 (2.0%) | 14,339 (43%) |
| MARINE | 1,656,442 | 4,271 (0.3%) | 399,253 (24.1%) |
| LAKE | 541,983 | 5,761 (1.1%) | 227,269 (41.9%) |

**Table S9. The number of contigs in metaSPAdes assemblies identified as plasmidic by plasmidVerify and cBar.**
