# Supplementary figures and images for: Plasmid detection and assembly in genomic and metagenomic data sets
Source: HighWire-hosted journal article supplement (doi:10.1101/gr.241299.118), 2019-05-02

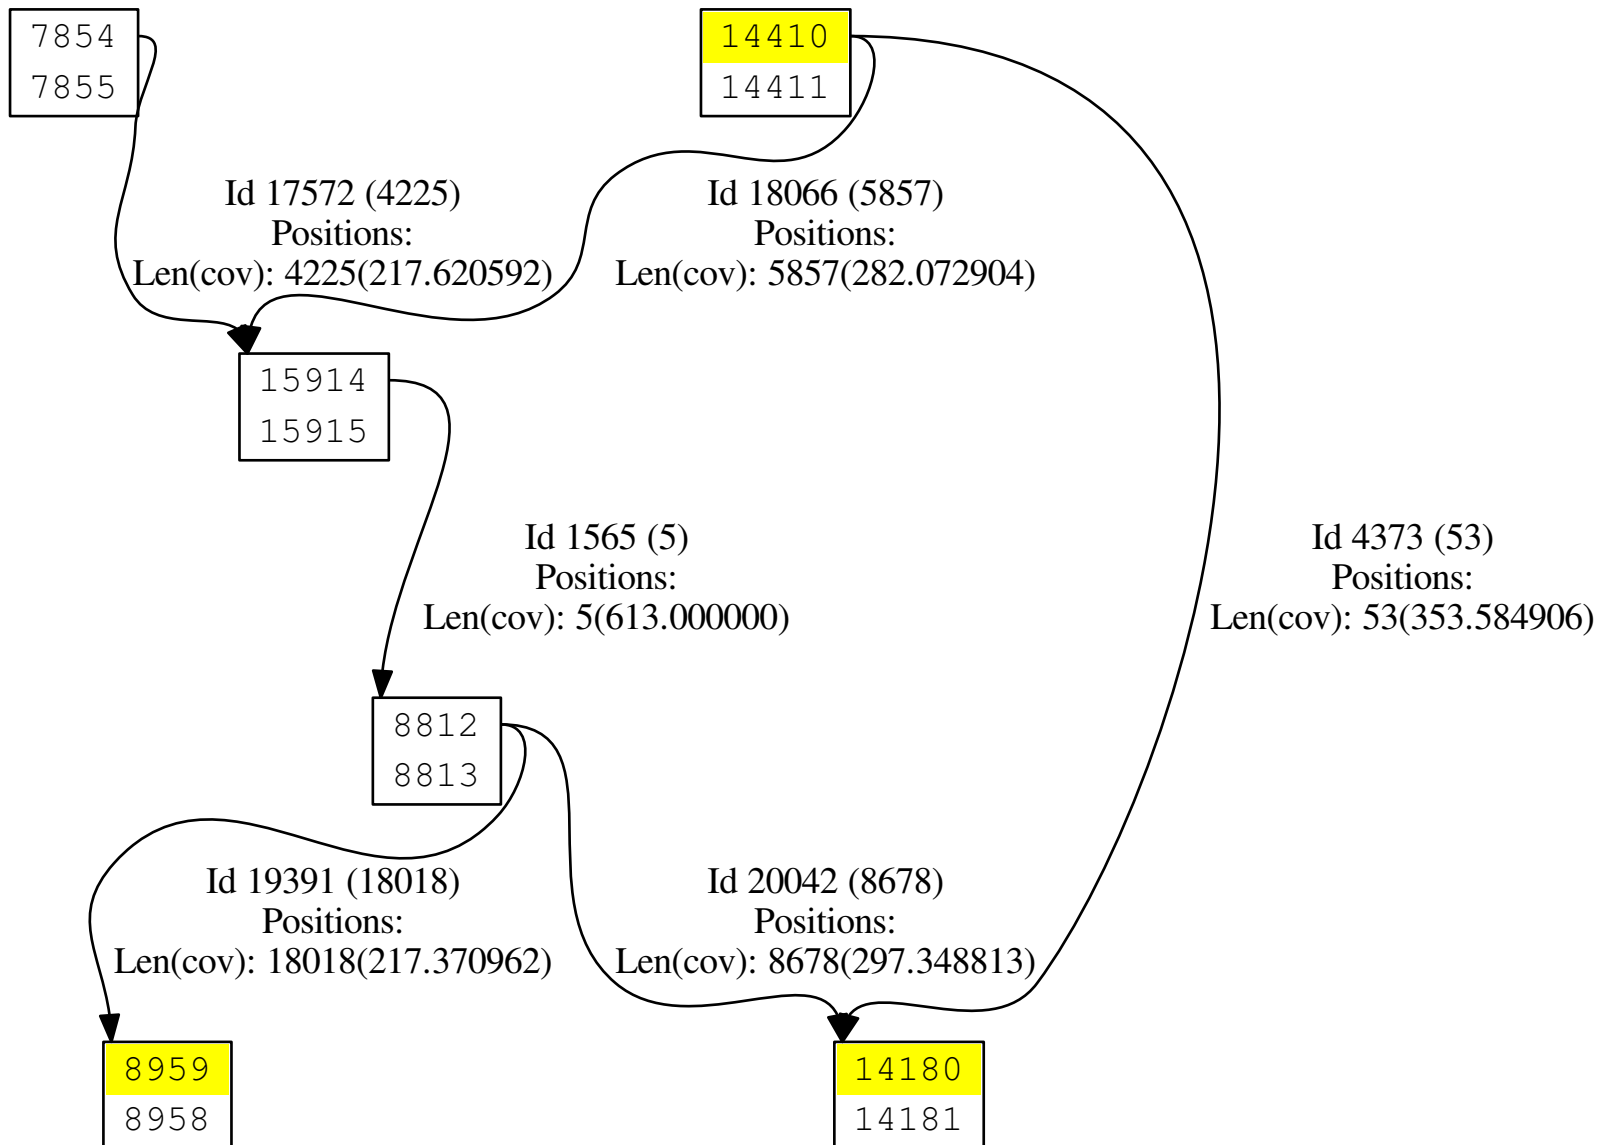

Supplement: Supplemental_File_S2.zip [file basic_repeat.pdf › spades-metaplasmid_3.13.0/assembler/src/test/debruijn/graph_fragments/ecoli_400k/basic_repeat.pdf]

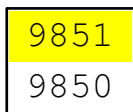

Id 20129 (46098)  
Positions:  
Len(cov): 46098(212.957373)

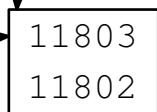

Id 20131 (56)  
Positions:  
Len(cov): 56(162.125000)

Id 17993 (29)  
Positions:  
Len(cov): 29(290.241379)

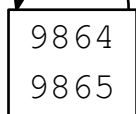

Id 19506 (140712)  
Positions:  
Len(cov): 140712(220.239475)

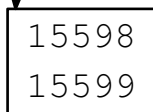

Supplement: Supplemental_File_S2.zip [file loop.pdf › spades-metaplasmid_3.13.0/assembler/src/test/debruijn/graph_fragments/ecoli_400k/loop.pdf]
